# Supplementary material for: Floristic analyses of Shandong peninsula and adjacent areas indicate the barrier effect of the Yellow river on floristic diversity
Source: Frontiers journal article supplement (doi:10.3389/fpls.2024.1419876), 2024-08-15
Supplement: Image_1.pdf [file Image_1.pdf]

## Supplementary Material

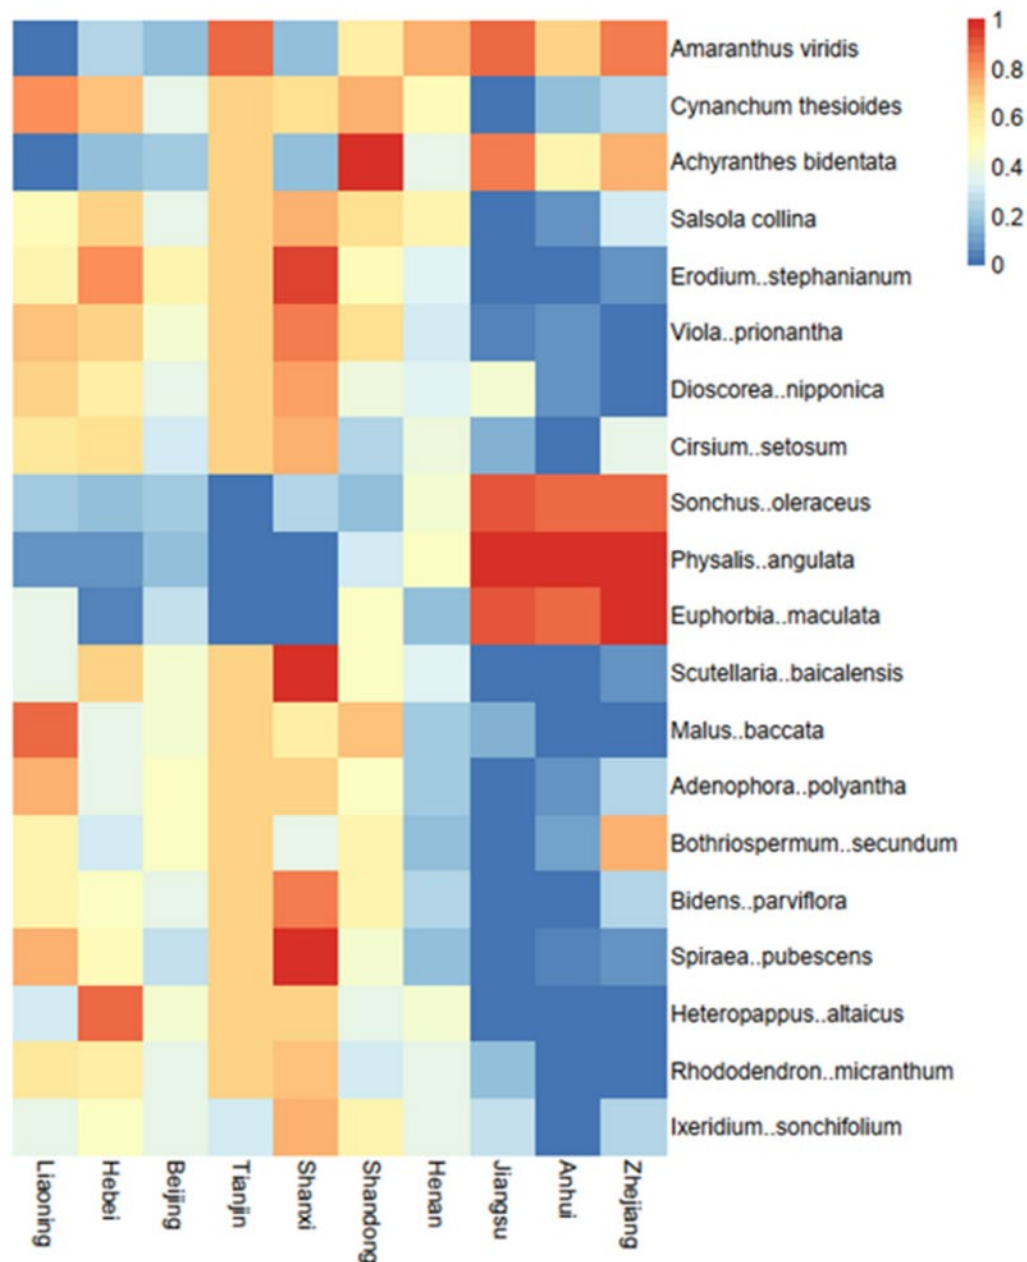

**Supplementary Figure 1.** A heatmap illustrating the distribution and relative abundance of the most commonly shared species in at least two, but not all, regions. The color grades indicate their relative abundances which transformed by the log base 10.
