# Supplementary material for: Floristic analyses of Shandong peninsula and adjacent areas indicate the barrier effect of the Yellow river on floristic diversity
Source: Front Plant Sci. 2024 Aug 15;15:1419876. doi: 10.3389/fpls.2024.1419876 (PMC11358103; doi:10.3389/fpls.2024.1419876)
Supplement: Supplementary file 1 [file Table1.xlsx]

## Sheet: Sheet1
Supplementary Table1. The investigated species, their distribution areas and relative abundances.
Family	Genus	Species	Beijing	Tianjin	Hebei	Shanxi	Liaoning	Shandong	Henan	Zhejiang	Jiangsu	Anhui
Acanthaceae	Asystasia	Asystasia neesiana	0	0	0	0	0	0	0.0705882	0.107692	0.2	0.0125
Acanthaceae	Justicia	Justicia championii	0	0	0	0	0	0	0	0	0.363636	0.1375
Acanthaceae	Peristrophe	Peristrophe japonica	0.0555556	0	0	0	0	0	0.0823529	0.261538	0.672727	0.3
Acanthaceae	Rungia	Rungia chinensis	0	0	0	0	0	0	0	0	0.0727273	0.025
Acanthaceae	Rungia	Rungia densiflora	0	0	0	0	0	0	0	0	0.145455	0.1875
Acanthaceae	Strobilanthes	Strobilanthes oliganthus	0	0	0	0	0	0	0	0	0.272727	0.05
Aceraceae	Acer	Acer dielsii	0	0	0	0.0909091	0	0	0.0823529	0	0	0
Aceraceae	Acer	Acer grosseri	0	0.333333	0.0909091	0.2	0	0.223529	0.141176	0	0.0181818	0.1
Aceraceae	Acer	Acer negundo	0.166667	0.666667	0.163636	0.345455	0.4	0.647059	0.152941	0.0923077	0.0909091	0
Aceraceae	Acer	Acer olivaceum	0	0	0	0	0	0	0	0	0.163636	0.075
Aceraceae	Acer	Acer oliverianum	0	0	0	0.0909091	0	0	0.105882	0	0.272727	0.075
Aceraceae	Acer	Acer sinopurpurascens	0	0	0	0	0	0	0	0.0769231	0.236364	0.0125
Aceraceae	Acer	Acer buergerianum	0	0	0	0	0	0	0	0	0.145455	0.0125
Aceraceae	Acer	Acer griseum	0.0555556	0	0	0.127273	0	0.0588235	0.129412	0	0	0
Aceraceae	Acer	Acer henryi	0	0	0	0	0	0	0	0.0769231	0.218182	0.0125
Aceraceae	Acer	Acer linganense	0	0	0	0	0	0	0.0117647	0	0.181818	0.075
Aceraceae	Acer	Acer tataricum	0	0	0	0	0	0.0705882	0.117647	0.107692	0.272727	0.2375
Aceraceae	Acer	Acer wilsonii	0	0	0	0.0363636	0	0.129412	0.223529	0.184615	0.236364	0.1
Actinidiaceae	Actinidia	Actinidia callosa	0	0	0	0	0	0	0	0	0.490909	0.1125
Actinidiaceae	Actinidia	Actinidia chinensis	0.0555556	0	0	0	0	0	0.247059	0.0769231	0.581818	0.175
Actinidiaceae	Actinidia	Actinidia lanceolata	0	0	0	0	0	0	0.0588235	0	0.527273	0.25
Actinidiaceae	Actinidia	Actinidia melanandra	0.0555556	0	0.0363636	0	0	0	0.0470588	0	0.218182	0.0625
Actinidiaceae	Actinidia	Actinidia polygama	0	0	0.0363636	0	0.3	0.247059	0.0235294	0	0.109091	0.025
Actinidiaceae	Actinidia	Actinidia valvata	0	0	0	0	0	0	0	0	0.272727	0.075
Actinidiaceae	Actinidia	Actinidia latifolia	0	0	0	0	0	0	0	0	0.109091	0.0625
Actinidiaceae	Actinidia	Actinidia kolomikta	0.0555556	0.333333	0.0727273	0.0909091	0.128571	0.141176	0.0588235	0	0	0
Adoxaceae	Adoxa	Adoxa moschatellina	0.166667	0.333333	0.0545455	0	0.157143	0.0588235	0	0	0	0
Aizoaceae	Trigastrotheca	Trigastrotheca stricta	0.0555556	0	0	0.0909091	0	0.294118	0.0117647	0.446154	0.618182	0.3875
Alangiaceae	Alangium	Alangium chinense	0.0555556	0.333333	0	0.127273	0.1	0.129412	0.317647	0.569231	0.727273	0.45
Alangiaceae	Alangium	Alangium kurzii	0	0	0	0	0	0	0.0823529	0.276923	0.672727	0.125
Alismataceae	Alisma	Alisma canaliculatum	0	0	0	0	0	0	0	0.338462	0.236364	0
Alismataceae	Alisma	Alisma plantago-aquatica	0.111111	0	0.0909091	0.0363636	0.0714286	0.0705882	0	0.0153846	0	0
Alismataceae	Sagittaria	Sagittaria potamogetifola	0	0	0	0	0.0714286	0	0	0	0.0181818	0
Alismataceae	Sagittaria	Sagittaria pygmaea	0	0	0	0	0	0	0.105882	0.169231	0.363636	0.0125
Alismataceae	Sagittaria	Sagittaria trifolia	0.166667	0.333333	0.2	0.109091	0.485714	0.117647	0.0823529	0.123077	0.145455	0
Amaranthaceae	Achyranthes	Achyranthes bidentata	0.222222	0.666667	0.181818	0.181818	0	1	0.376471	0.738462	0.854545	0.5375
Amaranthaceae	Alternanthera	Alternanthera philoxeroides	0.166667	0	0.0181818	0	0	0.152941	0.270588	0.415385	0.963636	0.9625
Amaranthaceae	Alternanthera	Alternanthera sessilis	0	0	0	0	0.0142857	0.0941176	0.0705882	0.446154	0.545455	0.2125
Amaranthaceae	Amaranthus	Amaranthus spinosus	0.277778	0	0.0181818	0	0	0.223529	0.164706	0.769231	1	0.5875
Amaranthaceae	Amaranthus	Amaranthus viridis	0.166667	0.866667	0.236364	0.2	0	0.576471	0.741176	0.861538	0.872727	0.7
Amaranthaceae	Amaranthus	Amaranthus hybridus	0.277778	0	0.0181818	0	0.0142857	0.341176	0.223529	0.753846	1	0.7625
Amaranthaceae	Chenopodium	Chenopodium gracilispicum	0.0555556	0	0	0.0181818	0	0.188235	0.0470588	0.415385	0.109091	0.025
Amaranthaceae	Cyathula	Cyathula officinalis	0	0	0.0181818	0	0	0	0	0	0.0181818	0
Amaranthaceae	Amaranthus	Amaranthus graecizans	0.0555556	0.333333	0.0181818	0.290909	0	0.0705882	0.223529	0	0	0
Amaryllidaceae	Lycoris	Lycoris aurea	0	0	0.0181818	0	0	0	0.0823529	0.0153846	0.109091	0
Amaryllidaceae	Lycoris	Lycoris chinensis	0	0	0	0	0	0	0.0588235	0.0153846	0.218182	0
Amaryllidaceae	Lycoris	Lycoris sprengeri	0	0	0	0	0	0	0	0.0153846	0.381818	0
Amaryllidaceae	Lycoris	Lycoris radiata	0	0	0	0	0	0.0588235	0.117647	0.169231	0.418182	0.0125
Amaryllidaceae	Lycoris	Lycoris squamigera	0	0	0	0	0	0	0.0588235	0.0769231	0.181818	0
Anacardiaceae	Choerospondias	Choerospondias axillaris	0	0	0	0	0	0	0	0.0923077	0.290909	0.0125
Anacardiaceae	Cotinus	Cotinus coggygria	0.111111	0.0666667	0.0363636	0.272727	0.0714286	0.811765	0.270588	0.0769231	0.0545455	0
Anacardiaceae	Rhus	Rhus potaninii	0	0	0.0363636	0.490909	0	0	0.117647	0	0	0.0625
Anacardiaceae	Toxicodendron	Toxicodendron succedaneum	0	0	0.0181818	0	0	1	0.0705882	0.0153846	0.636364	0.0875
Anacardiaceae	Toxicodendron	Toxicodendron sylvestre	0	0	0	0	0	0.0117647	0.0941176	0.369231	0.581818	0.2625
Anacardiaceae	Toxicodendron	Toxicodendron trichocarpum	0	0	0	0	0	0	0	0.0769231	0.254545	0.0875
Apocynaceae	Apocynum	Apocynum venetum	0.388889	0.333333	0.381818	0.381818	0.357143	0.517647	0.317647	0.415385	0	0
Apocynaceae	Asclepias	Asclepias curassavica	0.0555556	0.333333	0	0	0.0857143	0	0.0705882	0.0769231	0.0909091	0
Apocynaceae	Biondia	Biondia henryi	0	0	0	0	0	0	0.0588235	0.0153846	0.127273	0.1375
Apocynaceae	Catharanthus	Catharanthus roseus	0	0	0	0.0909091	0	0.117647	0	0.0769231	0.2	0.0625
Apocynaceae	Cynanchum	Cynanchum amplexicaule	0.111111	0.333333	0.109091	0	0.171429	0.0705882	0.0705882	0.107692	0	0.0625
Apocynaceae	Cynanchum	Cynanchum atratum	0.277778	0.333333	0.127273	0.109091	0.6	0.282353	0.105882	0.246154	0	0.0375
Apocynaceae	Cynanchum	Cynanchum bungei	0.277778	0.666667	0.618182	0.454545	0.2	0.188235	0.0352941	0	0	0
Apocynaceae	Cynanchum	Cynanchum glaucescens	0	0	0	0	0	0	0	0	0.2	0.0125
Apocynaceae	Cynanchum	Cynanchum inamoenum	0.277778	0.333333	0.4	0.418182	0.1	0.282353	0.117647	0	0.109091	0.1125
Apocynaceae	Cynanchum	Cynanchum taihangense	0	0	0.0727273	0	0	0	0	0	0.0181818	0.0125
Apocynaceae	Cynanchum	Cynanchum thesioides	0.388889	0.666667	0.727273	0.654545	0.828571	0.752941	0.529412	0.246154	0	0.175
Apocynaceae	Cynanchum	Cynanchum chekiangense	0	0	0	0	0	0	0.0117647	0	0.236364	0.0125
Apocynaceae	Cynanchum	Cynanchum chinense	0	0	0	0	0	0	0.0588235	0.4	0.363636	0.1125
Apocynaceae	Cynanchum	Cynanchum stauntonii	0.0555556	0	0.0363636	0	0	0	0.0117647	0	0.690909	0.175
Apocynaceae	Trachelospermum	Trachelospermum jasminoides	0.0555556	0	0.0181818	0.218182	0	0.152941	0.247059	0.753846	0.836364	0.4875
Apocynaceae	Tylophora	Tylophora floribunda	0	0	0	0	0	0	0.0705882	0.338462	0.309091	0.1125
Apocynaceae	Tylophora	Tylophora silvestris	0	0	0	0	0	0	0	0.0307692	0.254545	0.0875
Apocynaceae	Vinca	Vinca major	0	0	0	0	0	0.0588235	0	0.0769231	0.0909091	0
Aquifoliaceae	Ilex	Ilex buergeri	0	0	0	0	0	0.0588235	0	0	0.454545	0.125
Aquifoliaceae	Ilex	Ilex chinensis	0	0	0.0181818	0	0	0.0235294	0.0705882	0.307692	0.563636	0.4
Aquifoliaceae	Ilex	Ilex cornuta	0	0	0	0.0909091	0	0.458824	0.152941	0.369231	0.436364	0.55
Aquifoliaceae	Ilex	Ilex crenata	0	0	0	0	0	0.129412	0	0	0.472727	0.0125
Aquifoliaceae	Ilex	Ilex editicostata	0	0	0	0	0	0	0.0117647	0	0.181818	0
Aquifoliaceae	Ilex	Ilex elmerrilliana	0	0	0	0	0	0	0	0	0.763636	0.0375
Aquifoliaceae	Ilex	Ilex lohfauensis	0	0	0	0	0	0	0	0.0153846	0.145455	0.025
Aquifoliaceae	Ilex	Ilex macrocarpa	0	0	0	0	0	0	0.0117647	0.0769231	0.127273	0.3125
Aquifoliaceae	Ilex	Ilex macropoda	0	0	0	0	0	0	0	0.0769231	0.181818	0.1625
Aquifoliaceae	Ilex	Ilex micrococca	0	0	0	0	0	0	0	0	0.327273	0.0125
Aquifoliaceae	Ilex	Ilex rotunda	0	0	0	0	0	0	0	0.0923077	0.690909	0.15
Aquifoliaceae	Ilex	Ilex suaveolens	0	0	0	0	0	0	0	0.169231	0.527273	0.15
Aquifoliaceae	Ilex	Ilex wilsonii	0	0	0	0	0	0	0	0	0.618182	0.1625
Aquifoliaceae	Ilex	Ilex ficoidea	0	0	0	0	0	0	0	0	0.436364	0.075
Aquifoliaceae	Ilex	Ilex latifrons	0	0	0	0	0	0.0117647	0	0.0923077	0.745455	0.2375
Aquifoliaceae	Ilex	Ilex pedunculosa	0	0	0	0	0	0	0	0.0769231	0.2	0.2125
Aquifoliaceae	Ilex	Ilex pernyi	0	0	0	0	0	0.0117647	0	0	0.0363636	0.0375
Aquifoliaceae	Ilex	Ilex pubescens	0	0	0	0	0	0	0	0	0.8	0.0875
Aquifoliaceae	Ilex	Ilex triflora	0	0	0	0	0	0	0	0.0769231	0.272727	0.075
Aquifoliaceae	Ilex	Ilex viridis	0	0	0	0	0	0	0	0.0923077	0.4	0.075
Araceae	Acorus	Acorus calamus	0	0	0.0181818	0	0	1	0	0.0923077	0.363636	0
Araceae	Amorphophallus	Amorphophallus konjac	0	0	0	0	0	0	0.0588235	0.0153846	0.0181818	0.0125
Araceae	Arisaema	Arisaema amurense	0.277778	0.666667	0.181818	0.0181818	0.385714	0.117647	0.0117647	0	0.127273	0.0125
Araceae	Arisaema	Arisaema angustatum	0	0	0	0	0.0142857	0	0.0117647	0	0	0
Araceae	Arisaema	Arisaema lobatum	0	0	0	0	0	0	0.0705882	0	0.127273	0.0625
Araceae	Arisaema	Arisaema silvestrii	0	0	0	0	0	0	0.0117647	0.0153846	0.236364	0
Araceae	Arisaema	Arisaema erubescens	0.222222	0	0.0363636	0.127273	0	0	0.141176	0	0.581818	0.0875
Araceae	Arisaema	Arisaema sikokianum	0	0	0.0181818	0	0	0	0	0	0.181818	0.0625
Araceae	Pinellia	Pinellia cordata	0	0	0	0	0	0	0	0	0.472727	0.275
Araceae	Pistia	Pistia stratiotes	0	0.333333	0	0	0	0.176471	0.0941176	0.0923077	0.381818	0.075
Araceae	Sauromatum	Sauromatum giganteum	0.0555556	0.666667	0.0909091	0	0.0714286	0	0.0941176	0.0769231	0	0
Araceae	Zantedeschia	Zantedeschia aethiopica	0	0	0	0	0	0.117647	0.0117647	0	0	0
Araliaceae	Aralia	Aralia continentalis	0	0	0.0181818	0	0.0142857	0	0	0	0	0
Araliaceae	Aralia	Aralia dasyphylla	0	0	0	0	0	0	0	0	0.0727273	0.075
Araliaceae	Aralia	Aralia elata	0.111111	0	0.0363636	0.0181818	0.0142857	0	0.0823529	0.0769231	0.109091	0.075
Araliaceae	Aralia	Aralia cordata	0	0	0	0	0	0	0	0	0.0909091	0.0125
Araliaceae	Aralia	Aralia echinocaulis	0	0	0	0	0	0	0	0.0769231	0.236364	0.1125
Araliaceae	Aralia	Aralia elata	0.166667	0.333333	0.0363636	0	0.314286	0.176471	0	0.153846	0.0909091	0
Araliaceae	Dendropanax	Dendropanax dentiger	0	0	0	0	0	0	0.0117647	0.0769231	0.490909	0.1375
Araliaceae	Eleutherococcus	Eleutherococcus henryi	0	0	0	0.0727273	0	0	0	0.0769231	0	0
Araliaceae	Eleutherococcus	Eleutherococcus leucorrhizus var. fulvescens	0	0	0	0.0181818	0	0	0.0470588	0	0.0181818	0
Araliaceae	Eleutherococcus	Eleutherococcus leucorrhizus var. scaberulus	0	0	0	0	0	0	0.0235294	0	0.0181818	0.0125
Araliaceae	Eleutherococcus	Eleutherococcus scandens	0	0	0	0	0	0	0	0	0.127273	0.025
Araliaceae	Fatsia	Fatsia japonica	0	0	0	0	0	0.0705882	0	0.0769231	0.0909091	0.0625
Araliaceae	Hedera	Hedera nepalensis	0	0	0	0	0	0.129412	0.152941	0.0923077	0.545455	0.3625
Araliaceae	Kalopanax	Kalopanax septemlobus	0	0.666667	0.0727273	0.145455	0.114286	0.458824	0.188235	0.261538	0.345455	0.1375
Araliaceae	Pentapanax	Pentapanax henryi	0	0	0	0	0	0	0	0	0.0181818	0.075
Araliaceae	Tetrapanax	Tetrapanax papyrifer	0	0	0	0	0	0	0	0.0769231	0.0909091	0.025
Araliaceae	Eleutherococcus	Eleutherococcus senticosus	0.111111	0.333333	0.272727	0.218182	0.371429	0.0117647	0.0588235	0.0769231	0	0
Araliaceae	Panax	Panax ginseng	0	0	0.0181818	0.0181818	0.171429	0.0117647	0.0588235	0	0	0
Aristolochiaceae	Aristolochia	Aristolochia tubiflora	0	0	0	0	0	0	0.0117647	0.0769231	0.527273	0.125
Aristolochiaceae	Aristolochia	Aristolochia debilis	0	0	0.0181818	0.0181818	0.0714286	0.435294	0.2	0.723077	0.654545	0.6
Aristolochiaceae	Aristolochia	Aristolochia mollissimum	0	0	0	0	0	0.4	0.176471	0.476923	0.109091	0.225
Aristolochiaceae	Asarum	Asarum forbesii	0	0	0	0	0	0	0.0705882	0.353846	0.218182	0.225
Aristolochiaceae	Asarum	Asarum fukienense	0	0	0	0	0	0	0	0	0.2	0.025
Aristolochiaceae	Asarum	Asarum ichangense	0	0	0	0	0	0	0	0.0769231	0.381818	0.075
Aristolochiaceae	Asarum	Asarum sieboldii	0	0	0	0	0	0.0588235	0.117647	0	0.0909091	0.1
Balsaminaceae	Impatiens	Impatiens davidii	0	0	0	0	0	0	0.0470588	0	0.163636	0.0125
Balsaminaceae	Impatiens	Impatiens neglecta	0	0	0	0	0	0	0	0	0.0727273	0.075
Balsaminaceae	Impatiens	Impatiens pterosepala	0	0	0	0	0	0	0.129412	0	0	0.125
Balsaminaceae	Impatiens	Impatiens blepharosepala	0	0	0	0	0	0	0.0117647	0	0.0545455	0.0875
Balsaminaceae	Impatiens	Impatiens noli-tangere	0.388889	0.666667	0.381818	0.254545	0.371429	0.470588	0.0823529	0	0.0181818	0
Balsaminaceae	Impatiens	Impatiens henanensis	0	0	0	0.0181818	0	0	0.117647	0	0	0
Basellaceae	Anredera	Anredera cordifolia	0	0	0	0	0.0714286	0	0	0.0769231	0.636364	0
Begoniaceae	Begonia	Begonia grandis	0.222222	0.666667	0.0363636	0.0181818	0.0142857	0	0.317647	0.0153846	0.145455	0.1
Berberidaceae	Berberis	Berberis amurensis	0.388889	0.333333	0.327273	0.690909	0.357143	0.141176	0.152941	0.0769231	0	0
Berberidaceae	Berberis	Berberis brachypoda	0	0	0	0.272727	0	0	0.105882	0	0	0.0125
Berberidaceae	Berberis	Berberis dasystachya	0	0.333333	0.0909091	0.163636	0	0	0.0941176	0.0769231	0	0.0125
Berberidaceae	Berberis	Berberis poiretii	0.388889	0.666667	0.436364	0.109091	0.642857	0.0117647	0.0117647	0	0	0
Berberidaceae	Berberis	Berberis sibirica	0.111111	0.333333	0.163636	0	0.0714286	0	0.0117647	0	0	0
Berberidaceae	Berberis	Berberis dielsiana	0.0555556	0.333333	0	0.272727	0.0142857	0	0.223529	0.0769231	0	0
Berberidaceae	Berberis	Berberis hersii	0	0	0.0363636	0.290909	0	0.0705882	0	0	0	0
Berberidaceae	Epimedium	Epimedium brevicornu	0	0	0	0.4	0	0	0.164706	0	0.0181818	0
Berberidaceae	Epimedium	Epimedium pubescens	0	0	0.0181818	0	0	0	0.0117647	0	0	0
Berberidaceae	Berberis	Berberis anhweiensis	0	0	0	0	0	0	0	0	0.127273	0.1125
Berberidaceae	Berberis	Berberis virgetorum	0	0	0	0	0	0.0117647	0	0.0923077	0.290909	0.1375
Berberidaceae	Caulophyllum	Caulophyllum robustum	0.0555556	0.333333	0.145455	0.0909091	0.128571	0	0.164706	0	0.109091	0.025
Berberidaceae	Dysosma	Dysosma versipellis	0	0	0	0	0	0	0.0117647	0	0.109091	0.1
Berberidaceae	Epimedium	Epimedium koreanum	0	0	0	0.0181818	0.2	0	0	0	0	0
Berberidaceae	Mahonia	Mahonia bealei	0	0	0	0	0.0857143	0.152941	0.129412	0.153846	0.490909	0.075
Berberidaceae	Nandina	Nandina domestica	0.0555556	0.333333	0	0.127273	0.0142857	0.470588	0.294118	0.615385	0.509091	0.1875
Betulaceae	Alnus	Alnus cremastogyne	0	0	0	0	0	0	0	0.0769231	0.145455	0.0625
Betulaceae	Alnus	Alnus japonica	0.0555556	0	0	0	0.2	0.282353	0.0705882	0.107692	0.0909091	0
Betulaceae	Alnus	Alnus trabeculosa	0	0	0	0	0	0.0588235	0.105882	0.169231	0.2	0.125
Betulaceae	Betula	Betula luminifera	0	0	0	0	0	0	0.105882	0.0769231	0.309091	0.1875
Betulaceae	Carpinus	Carpinus hupeana	0	0	0	0	0	0	0.0352941	0.0769231	0.109091	0.025
Betulaceae	Carpinus	Carpinus londoniana	0	0	0	0	0	0	0	0	0.509091	0.0125
Betulaceae	Carpinus	Carpinus tschonoskii	0	0	0	0	0	0	0.0588235	0.0923077	0.0363636	0
Betulaceae	Carpinus	Carpinus viminea	0	0	0	0	0	0	0	0.0923077	0.636364	0.15
Betulaceae	Ostrya	Ostrya japonica	0	0.333333	0.0363636	0.0363636	0.0142857	0	0.0235294	0.0769231	0	0
Betulaceae	Betula	Betula albosinensis	0.111111	0	0.0363636	0.109091	0.0142857	0	0.0941176	0	0	0
Betulaceae	Betula	Betula dahurica	0.333333	0.333333	0.309091	0.0909091	0.528571	0.0588235	0	0	0	0
Betulaceae	Betula	Betula platyphylla	0.388889	0.333333	0.454545	0.6	0.328571	0.188235	0.211765	0	0	0
Betulaceae	Betula	Betula utilis	0.0555556	0.333333	0.163636	0.181818	0	0.0117647	0.0235294	0.0769231	0	0
Betulaceae	Betula	Betula chinensis	0.388889	0.666667	0.418182	0.345455	0.542857	0.305882	0.2	0	0	0
Betulaceae	Corylus	Corylus mandshurica	0.333333	0.333333	0.436364	0.436364	0.4	0.0588235	0.0235294	0	0	0
Betulaceae	Ostryopsis	Ostryopsis davidiana	0.166667	0.333333	0.381818	0.981818	0.214286	0	0	0	0	0
Bignoniaceae	Catalpa	Catalpa fargesii	0	0.333333	0.0181818	0.309091	0	0.188235	0.0588235	0	0	0
Bignoniaceae	Incarvillea	Incarvillea sinensis	0.388889	0.666667	0.709091	0.8	0.185714	0.341176	0.211765	0	0.0909091	0
Bignoniaceae	Campsis	Campsis grandiflora	0.111111	0.733333	0.0363636	0.0909091	0	0.188235	0.164706	0.415385	0.309091	0.1125
Boraginaceae	Cynoglossum	Cynoglossum lanceolatum	0	0	0	0.0909091	0	0	0.0235294	0.0153846	0.109091	0
Boraginaceae	Lithospermum	Lithospermum arvense	0	0	0.163636	0.145455	0.0857143	0.176471	0.317647	0.630769	0.109091	0.1
Boraginaceae	Lithospermum	Lithospermum zollingeri	0	0	0	0	0	0.0588235	0.105882	0.415385	0.345455	0.2
Boraginaceae	Omphalotrigonotis	Omphalotrigonotis cupulifera	0	0	0	0	0	0	0	0	0.2	0.0125
Boraginaceae	Sinojohnstonia	Sinojohnstonia chekiangensis	0	0	0	0.163636	0	0	0.0705882	0	0.109091	0.1625
Boraginaceae	Thyrocarpus	Thyrocarpus glochidiatus	0.0555556	0	0	0	0.0714286	0.0823529	0.188235	0.169231	0.0909091	0.1375
Boraginaceae	Thyrocarpus	Thyrocarpus sampsonii	0	0	0	0	0	0	0.0117647	0.169231	0.509091	0.2125
Boraginaceae	Bothriospermum	Bothriospermum chinense	0.388889	0.333333	0.254545	0.327273	0.1	0.247059	0.223529	0.153846	0	0
Boraginaceae	Bothriospermum	Bothriospermum kusnezowii	0.333333	0.333333	0.181818	0.381818	0.171429	0	0.0588235	0.153846	0.0909091	0.0375
Boraginaceae	Bothriospermum	Bothriospermum secundum	0.5	0.666667	0.309091	0.381818	0.542857	0.564706	0.2	0.753846	0	0.125
Boraginaceae	Cynoglossum	Cynoglossum divaricatum	0.166667	0.333333	0.345455	0.636364	0.0428571	0	0.0352941	0	0	0
Boraginaceae	Eritrichium	Eritrichium borealisinense	0.166667	0.333333	0.163636	0.0909091	0.1	0	0	0	0	0
Boraginaceae	Lappula	Lappula myosotis	0.222222	0.666667	0.272727	0.672727	0.0857143	0.305882	0.164706	0.0153846	0	0
Boraginaceae	Lappula	Lappula shanhsiensis	0	0.333333	0.0363636	0.309091	0.0714286	0	0	0	0	0
Boraginaceae	Lithospermum	Lithospermum erythrorhizon	0.222222	0.333333	0.236364	0.0545455	0.628571	0.2	0.176471	0.0769231	0	0.125
Boraginaceae	Stenosolenium	Stenosolenium saxatile	0.111111	0.333333	0.254545	0.109091	0.0285714	0	0	0	0	0
Butomaceae	Butomus	Butomus umbellatus	0.333333	0.666667	0.127273	0	0.242857	0.0941176	0.0705882	0.0307692	0	0
Buxaceae	Buxus	Buxus bodinieri	0	0	0	0	0	0.0823529	0.0117647	0	0.0727273	0.1375
Buxaceae	Buxus	Buxus sinica	0.166667	0.333333	0	0.0909091	0.0714286	0.352941	0.235294	0.261538	0.327273	0.1
Callitrichaceae	Callitriche	Callitriche palustris	0	0	0	0	0	0	0	0.169231	0.309091	0.0125
Calycanthaceae	Chimonanthus	Chimonanthus nitens	0	0	0	0	0	0	0	0.153846	0.309091	0.1625
Calycanthaceae	Chimonanthus	Chimonanthus praecox	0.111111	0.333333	0.0181818	0	0.0142857	0.670588	0.329412	0.2	0.272727	0.1125
Campanales	Chrysanthemum	Chrysanthemum vestitum	0	0	0	0	0	0	0.176471	0	0	0.0375
Campanales	Cirsium	Cirsium lineare	0	0	0.0727273	0	0	0	0.223529	0	0	0.1
Campanales	Crepidiastrum	Crepidiastrum sonchifolium	0.111111	0.333333	0.236364	0	0	0.0588235	0.0705882	0	0	0
Campanales	Leontopodium	Leontopodium japonicum	0	0	0.0181818	0.181818	0.285714	0	0.282353	0	0.0363636	0.2
Campanales	Saussurea	Saussurea acromelaena	0	0.333333	0.0545455	0	0	0	0.0352941	0	0	0
Campanales	Senecio	Senecio ambracea	0.166667	0.333333	0.0545455	0.109091	0.128571	0.0117647	0.0823529	0	0.0909091	0
Campanales	Zinnia	Zinnia peruviana	0	0.666667	0.109091	0	0.0142857	0.152941	0.0588235	0.0769231	0	0.075
Campanulaceae	Adenophora	Adenophora stricta	0	0	0	0	0	0	0.0117647	0.0769231	0	0.0375
Campanulaceae	Adenophora	Adenophora trachelioides	0	0	0.0181818	0	0	0.0588235	0	0	0	0
Campanulaceae	Adenophora	Adenophora petiolata	0	0	0	0	0	0	0	0.0769231	0.236364	0.0125
Campanulaceae	Campanumoea	Campanumoea javanica	0	0	0	0	0	0	0	0	0.0545455	0.0625
Campanulaceae	Lobelia	Lobelia chinensis	0	0	0	0	0	0.0588235	0.0823529	0.630769	0.654545	0.65
Campanulaceae	Lobelia	Lobelia sessilifolia	0	0	0	0	0.0142857	0.0117647	0	0	0.0181818	0
Campanulaceae	Peracarpa	Peracarpa carnosa	0	0	0	0	0	0	0	0.0153846	0.181818	0.025
Campanulaceae	Wahlenbergia	Wahlenbergia marginata	0	0	0	0	0	0	0.0941176	0.169231	0.763636	0.325
Campanulaceae	Adenophora	Adenophora divaricata	0.388889	0.666667	0.290909	0.0181818	0.557143	0.0117647	0	0	0	0
Campanulaceae	Adenophora	Adenophora elata	0.166667	0.333333	0.163636	0.127273	0	0	0.0823529	0	0	0
Campanulaceae	Adenophora	Adenophora gmelinii	0	0.333333	0.0363636	0.236364	0.3	0	0.0588235	0	0	0
Campanulaceae	Adenophora	Adenophora petiolata	0	0	0.0181818	0.345455	0	0	0.188235	0	0	0
Campanulaceae	Adenophora	Adenophora polyantha	0.5	0.666667	0.4	0.690909	0.757143	0.494118	0.223529	0.261538	0	0.0875
Campanulaceae	Adenophora	Adenophora capillaris	0.277778	0.333333	0.272727	0.381818	0.0714286	0.0588235	0.141176	0	0	0
Campanulaceae	Adenophora	Adenophora potaninii	0.444444	0.666667	0.490909	0.436364	0.0428571	0.0588235	0.0705882	0	0	0
Campanulaceae	Campanula	Campanula punctata	0.166667	0	0.163636	0.181818	0.442857	0	0.0470588	0	0	0
Cannabaceae	Aphananthe	Aphananthe aspera	0	0	0	0	0	0.105882	0.0117647	0.446154	0.636364	0.2
Cannabaceae	Celtis	Celtis biondii	0	0	0	0	0	0	0.211765	0.630769	0.8	0.2875
Cannabaceae	Celtis	Celtis cerasifera	0	0.333333	0	0.0909091	0	0	0	0	0.0363636	0
Cannabaceae	Celtis	Celtis chekiangensis	0	0	0	0	0	0	0	0.0153846	0.145455	0.0375
Cannabaceae	Celtis	Celtis julianae	0	0	0	0	0	0.0117647	0.0823529	0.0153846	0.218182	0.0875
Cannabaceae	Celtis	Celtis koraiensis	0.222222	0.666667	0.2	0.163636	0.414286	0.411765	0.247059	0.0153846	0	0.1125
Cannabaceae	Celtis	Celtis sinensis	0.277778	0	0.0545455	0	0.0142857	0.870588	0.341176	0.707692	0.690909	0.35
Cannaceae	Canna	Canna indica	0	0.333333	0	0	0	0	0	0.0769231	0.218182	0
Caprifoliaceae	Dipsacus	Dipsacus japonicus	0.277778	0	0.309091	0.418182	0.0142857	0.0117647	0.141176	0.0769231	0.0363636	0.1625
Caprifoliaceae	Lonicera	Lonicera maackii	0	0	0	0	0	0.141176	0	0	0	0.0125
Caprifoliaceae	Patrinia	Patrinia heterophylla	0	0	0.0181818	0	0	0.117647	0.0705882	0	0.2	0.075
Caprifoliaceae	Abelia	Abelia biflora	0.388889	0.333333	0.563636	0.745455	0.171429	0	0.188235	0	0	0.075
Caprifoliaceae	Abelia	Abelia dielsii	0	0	0.0909091	0.218182	0	0	0.188235	0	0.163636	0.1125
Caprifoliaceae	Heptacodium	Heptacodium miconioides	0	0	0	0	0	0	0	0.0769231	0.345455	0
Caprifoliaceae	Kolkwitzia	Kolkwitzia amabilis	0.0555556	0	0.0181818	0.236364	0.142857	0.117647	0.176471	0	0	0.0625
Caprifoliaceae	Lonicera	Lonicera elisae	0.277778	0.333333	0.145455	0.327273	0	0	0.152941	0	0	0.0875
Caprifoliaceae	Lonicera	Lonicera ferdinandi	0	0.333333	0.0545455	0.672727	0.185714	0	0.0705882	0	0	0
Caprifoliaceae	Lonicera	Lonicera fragrantissima	0.111111	0.333333	0.0545455	0.163636	0	0.0588235	0.129412	0.0923077	0.163636	0.1625
Caprifoliaceae	Lonicera	Lonicera hispida	0.111111	0.333333	0.145455	0.327273	0	0.0117647	0.0705882	0.0769231	0	0
Caprifoliaceae	Lonicera	Lonicera microphylla	0.0555556	0	0.0727273	0.109091	0	0	0.0117647	0	0	0
Caprifoliaceae	Lonicera	Lonicera nervosa	0	0	0	0.0181818	0	0	0.105882	0	0	0
Caprifoliaceae	Lonicera	Lonicera tragophylla	0	0	0.0181818	0.363636	0	0.0588235	0.211765	0	0.2	0.125
Caprifoliaceae	Lonicera	Lonicera acuminata	0	0	0	0	0	0	0	0	0.309091	0.1
Caprifoliaceae	Lonicera	Lonicera chrysantha	0	0	0.0181818	0	0	0	0.0588235	0	0.0181818	0.0125
Caprifoliaceae	Lonicera	Lonicera guillonii	0	0	0	0	0	0	0	0	0.490909	0.15
Caprifoliaceae	Lonicera	Lonicera japonica	0	0	0	0	0	0.0588235	0	0	0	0.0125
Caprifoliaceae	Lonicera	Lonicera modesta	0	0	0	0	0	0	0	0	0.0363636	0.1875
Caprifoliaceae	Lonicera	Lonicera szechuanica	0	0	0.0909091	0.0181818	0	0	0	0	0	0
Caprifoliaceae	Lonicera	Lonicera tangutica	0	0.333333	0.181818	0.527273	0	0	0.152941	0	0	0
Caprifoliaceae	Lonicera	Lonicera trichosepala	0	0	0	0	0	0	0	0	0.127273	0.0875
Caprifoliaceae	Lonicera	Lonicera webbiana	0	0	0	0	0	0	0.0117647	0	0.145455	0.0625
Caprifoliaceae	Sambucus	Sambucus javanica	0	0	0.0545455	0	0	0	0.105882	0.353846	0.581818	0.2375
Caprifoliaceae	Triosteum	Triosteum pinnatifidum	0	0.333333	0.0545455	0.327273	0	0	0.235294	0	0	0
Caprifoliaceae	Viburnum	Viburnum fordiae	0	0	0	0	0	0	0	0.0153846	0.436364	0.0875
Caprifoliaceae	Viburnum	Viburnum hengshanicum	0	0	0	0	0	0	0	0	0.181818	0.2125
Caprifoliaceae	Viburnum	Viburnum keteleeri	0	0	0	0.0181818	0	0.117647	0.0823529	0.276923	0.2	0.0625
Caprifoliaceae	Viburnum	Viburnum melanocarpum	0	0	0	0	0	0	0	0.0153846	0.290909	0.1125
Caprifoliaceae	Viburnum	Viburnum mongolicum	0.333333	0.333333	0.4	0.490909	0.0142857	0	0.0941176	0	0.0909091	0
Caprifoliaceae	Viburnum	Viburnum sympodiale	0	0	0	0	0	0	0.0705882	0	0.436364	0.2125
Caprifoliaceae	Viburnum	Viburnum thunbergianum	0	0	0	0	0	0	0.141176	0	0.563636	0.1375
Caprifoliaceae	Viburnum	Viburnum glomeratum	0	0	0	0	0	0	0	0	0.109091	0.05
Caprifoliaceae	Viburnum	Viburnum setigerum	0	0	0	0	0	0	0	0.107692	0.345455	0.1875
Caprifoliaceae	Viburnum	Viburnum wrightii	0	0	0	0	0	0	0.0117647	0	0.0363636	0.0875
Caprifoliaceae	Weigela	Weigela japonica	0	0	0.0181818	0	0.0142857	0.0588235	0.0705882	0.0153846	0.563636	0.4375
Caryophyllaceae	Cerastium	Cerastium glomeratum	0.0555556	0	0	0	0	0.235294	0	0.384615	1	0.7
Caryophyllaceae	Cerastium	Cerastium wilsonii	0	0	0	0	0	0	0.0235294	0	0	0.025
Caryophyllaceae	Dianthus	Dianthus longicalyx	0	0	0.0181818	0.0545455	0	0.0823529	0.223529	0.276923	0.363636	0.1625
Caryophyllaceae	Gypsophila	Gypsophila tschiliensis	0.111111	0.333333	0.0363636	0	0	0	0.0235294	0	0	0
Caryophyllaceae	Lychnis	Lychnis banksia	0	0	0	0	0	0	0.0705882	0.0153846	0.163636	0.0875
Caryophyllaceae	Lychnis	Lychnis bungeana	0	0	0.0545455	0.0181818	0	0	0.152941	0.123077	0.272727	0.125
Caryophyllaceae	Lychnis	Lychnis cognata	0.111111	0.333333	0.181818	0.109091	0.385714	0.0705882	0	0.0923077	0	0
Caryophyllaceae	Pseudostellaria	Pseudostellaria davidii	0.333333	0.333333	0.381818	0.181818	0.185714	0.0588235	0.0235294	0	0.127273	0.1375
Caryophyllaceae	Pseudostellaria	Pseudostellaria heterophylla	0	0	0.0363636	0	0.228571	0.458824	0.0235294	0.261538	0.327273	0.1125
Caryophyllaceae	Pseudostellaria	Pseudostellaria sylvatica	0.111111	0.333333	0.0181818	0	0	0	0	0	0	0
Caryophyllaceae	Sagina	Sagina japonica	0	0	0.0181818	0.0181818	0.0714286	0.352941	0.0941176	0.446154	0.418182	0.2875
Caryophyllaceae	Sagina	Sagina maxima	0	0	0	0	0	0.0588235	0	0	0.0909091	0.1
Caryophyllaceae	Stellaria	Stellaria chinensis	0.444444	0.333333	0.163636	0	0	0.141176	0.270588	0.0461538	0.181818	0.15
Caryophyllaceae	Stellaria	Stellaria filicaulis	0.0555556	0	0	0	0.185714	0	0	0	0	0
Caryophyllaceae	Stellaria	Stellaria neglecta	0	0	0	0.0181818	0	0.0117647	0.0117647	0.415385	0.236364	0
Caryophyllaceae	Stellaria	Stellaria vestita	0	0	0.0181818	0.0363636	0	0	0.0352941	0	0.181818	0.0625
Caryophyllaceae	Arenaria	Arenaria juncea	0.277778	0.666667	0.327273	0.218182	0.0428571	0.188235	0.0117647	0	0	0
Caryophyllaceae	Cerastium	Cerastium furcatum	0	0	0.0181818	0.0181818	0	0	0.0352941	0	0	0
Caryophyllaceae	Cerastium	Cerastium lanceolata	0.0555556	0	0.0545455	0	0	0	0	0.0769231	0	0
Caryophyllaceae	Gypsophila	Gypsophila licentiana	0.0555556	0	0.0181818	0.109091	0	0	0	0	0	0
Caryophyllaceae	Gypsophila	Gypsophila oldhamiana	0	0.666667	0.145455	0.290909	0.6	0.552941	0.305882	0.184615	0.0909091	0.0125
Caryophyllaceae	Lychnis	Lychnis fulgens	0.277778	0.333333	0.254545	0.218182	0.128571	0	0.0470588	0.0153846	0	0.0125
Caryophyllaceae	Moehringia	Moehringia lateriflora	0.111111	0.333333	0.181818	0.0181818	0.0285714	0	0	0	0	0.0125
Caryophyllaceae	Pseudostellaria	Pseudostellaria heterantha	0.222222	0.333333	0.0909091	0.0363636	0	0	0	0	0.0181818	0.0375
Caryophyllaceae	Silene	Silene fortunei	0	0.333333	0.127273	0.381818	0	0.329412	0.329412	0.461538	0.927273	0.3875
Caryophyllaceae	Silene	Silene gonosperma	0	0	0.0181818	0.0727273	0	0	0	0	0	0
Caryophyllaceae	Silene	Silene jenisseensis	0.166667	0.333333	0.381818	0.418182	0.185714	0.235294	0	0	0.0909091	0
Caryophyllaceae	Silene	Silene tatarinowii	0.388889	0.333333	0.309091	0.490909	0	0	0.0823529	0	0	0
Caryophyllaceae	Stellaria	Stellaria cherleriae	0.111111	0.333333	0.0545455	0.0363636	0	0	0	0	0	0
Caryophyllaceae	Stellaria	Stellaria infracta	0.0555556	0.333333	0.127273	0.272727	0	0	0	0	0	0
Caryophyllaceae	Stellaria	Stellaria palustris	0.222222	0	0.0181818	0.363636	0.0428571	0.105882	0.0117647	0	0	0.0875
Caryophyllaceae	Stellaria	Stellaria umbellata	0	0	0.0181818	0.0181818	0	0	0	0	0	0
Celastraceae	Celastrus	Celastrus angulatus	0	0	0	0.254545	0	0.2	0.435294	0.107692	0.127273	0.2
Celastraceae	Celastrus	Celastrus gemmatus	0	0	0.0181818	0.363636	0	0	0.0823529	0.0923077	0.472727	0.225
Celastraceae	Celastrus	Celastrus hypoleucus	0	0	0.0363636	0.0181818	0	0	0.0705882	0	0.0181818	0
Celastraceae	Celastrus	Celastrus oblanceifolius	0	0	0	0	0	0	0	0	0.436364	0.0625
Celastraceae	Celastrus	Celastrus punctatus	0	0	0.0181818	0	0	0	0	0	0.127273	0.025
Celastraceae	Celastrus	Celastrus rosthornianus	0	0	0.0363636	0	0	0	0.0470588	0	0.145455	0.125
Celastraceae	Celastrus	Celastrus stylosus	0	0	0	0	0	0	0.0117647	0	0.272727	0.075
Celastraceae	Euonymus	Euonymus acanthocarpus	0	0	0	0	0	0	0.0117647	0	0.381818	0.0875
Celastraceae	Euonymus	Euonymus carnosus	0	0	0	0.0181818	0	0	0.141176	0.107692	0.836364	0.3125
Celastraceae	Euonymus	Euonymus centidens	0	0	0	0	0	0	0.0117647	0	0.509091	0.0875
Celastraceae	Euonymus	Euonymus chenmoui	0	0	0	0	0	0	0	0	0.272727	0.0875
Celastraceae	Euonymus	Euonymus dielsianus	0	0	0	0	0	0	0.0588235	0	0.163636	0.0125
Celastraceae	Euonymus	Euonymus echinatus	0	0	0	0.0909091	0	0	0	0.0153846	0	0.0125
Celastraceae	Euonymus	Euonymus euscaphis	0	0	0	0	0	0	0.0117647	0	0.272727	0.0125
Celastraceae	Euonymus	Euonymus fortunei	0.0555556	0	0	0.0181818	0.0142857	0.623529	0.352941	0.323077	0.745455	0.2375
Celastraceae	Euonymus	Euonymus hamiltonianus	0.0555556	0.333333	0.0727273	0.0909091	0	0.188235	0.141176	0.169231	0.345455	0.1125
Celastraceae	Euonymus	Euonymus laxiflorus	0	0	0	0	0	0	0	0.0769231	0.272727	0.0875
Celastraceae	Euonymus	Euonymus myrianthus	0	0	0	0	0	0	0	0	0.490909	0.025
Celastraceae	Euonymus	Euonymus nitidus	0	0	0	0.0909091	0.0142857	0.0117647	0.0117647	0	0.345455	0.025
Celastraceae	Euonymus	Euonymus oxyphyllus	0	0	0	0	0.171429	0.458824	0.0823529	0.0769231	0.2	0.125
Celastraceae	Euonymus	Euonymus echinatus	0	0	0	0	0	0	0	0	0.254545	0.0125
Celastraceae	Euonymus	Euonymus nitidus	0	0	0	0	0	0	0	0	0.690909	0.05
Celastraceae	Microtropis	Microtropis fokienensis	0	0	0	0	0	0	0	0	0.218182	0.0625
Celastraceae	Parnassia	Parnassia foliosa	0	0	0	0	0	0	0	0.0769231	0.0181818	0.1125
Celastraceae	Parnassia	Parnassia oreophila	0.0555556	0.333333	0.272727	0.290909	0	0	0.0117647	0	0	0
Celastraceae	Parnassia	Parnassia palustris	0.333333	0.333333	0.381818	0.381818	0.328571	0	0.0470588	0.0769231	0	0.0625
Celastraceae	Tripterygium	Tripterygium wilfordii	0	0	0	0	0	0	0	0.0769231	0.527273	0.1625
Celastraceae	Euonymus	Euonymus frigidus	0	0	0	0.0181818	0	0	0.0117647	0	0	0
Celastraceae	Euonymus	Euonymus giraldii	0.0555556	0	0.109091	0.0727273	0.0714286	0	0.105882	0	0	0.025
Celastraceae	Euonymus	Euonymus nanoides	0	0.333333	0.0363636	0.0909091	0	0	0	0	0	0
Celastraceae	Euonymus	Euonymus phellomanus	0.0555556	0	0.0363636	0.0545455	0	0.2	0.141176	0.0769231	0.0909091	0.0625
Celastraceae	Euonymus	Euonymus sanguineus	0	0	0	0.363636	0	0	0.0823529	0	0	0
Celastraceae	Euonymus	Euonymus semenovii	0	0	0.0545455	0.0181818	0	0	0	0	0	0
Celastraceae	Euonymus	Euonymus verrucosoides	0	0	0.0181818	0.2	0.0714286	0	0.117647	0	0.0181818	0.0125
Celastraceae	Euonymus	Euonymus semenovii	0.0555556	0	0.0181818	0.0181818	0	0	0	0	0	0
Ceratophyllaceae	Ceratophyllum	Ceratophyllum demersum	0.166667	0.333333	0.127273	0	0.0714286	0.164706	0.0941176	0.430769	0.290909	0.2125
Cercidiphyllaceae	Cercidiphyllum	Cercidiphyllum japonicum	0.0555556	0	0	0.0545455	0	0	0.0941176	0	0.0363636	0.0375
Chenopodiaceae	Agriophyllum	Agriophyllum squarrosum	0.111111	0.333333	0.218182	0.109091	0.171429	0	0.0941176	0	0	0.0125
Chenopodiaceae	Atriplex	Atriplex fera	0	0.333333	0.0363636	0.0909091	0.0714286	0	0	0	0	0
Chenopodiaceae	Axyris	Axyris amaranthoides	0.333333	0.333333	0.363636	0.218182	0.3	0	0	0	0	0
Chenopodiaceae	Axyris	Axyris hybrida	0	0.333333	0.0545455	0.0727273	0	0	0	0	0	0
Chenopodiaceae	Bassia	Bassia dasyphylla	0	0.333333	0.127273	0.236364	0.0142857	0	0.0117647	0	0	0
Chenopodiaceae	Chenopodium	Chenopodiastrum hybridum	0.333333	0.333333	0.290909	0.581818	0.242857	0.0588235	0.0941176	0	0	0
Chenopodiaceae	Chenopodium	Chenopodium strictum	0	0	0.0181818	0.436364	0.0285714	0	0.0117647	0	0	0
Chenopodiaceae	Chenopodium	Chenopodium urbica	0.111111	0.4	0.0909091	0.127273	0	0.0705882	0	0.0153846	0	0
Chenopodiaceae	Chenopodium	Chenopodium giganteum	0	0	0	0	0.0285714	0	0.0117647	0	0.109091	0
Chenopodiaceae	Corispermum	Corispermum declinatum	0	0.333333	0.0545455	0.218182	0	0	0.0705882	0	0	0
Chenopodiaceae	Salicornia	Salicornia europaea	0	0.333333	0.0181818	0.109091	0.214286	0.129412	0	0.107692	0.0909091	0
Chenopodiaceae	Salsola	Salsola collinum	0.388889	0.666667	0.690909	0.763636	0.528571	0.658824	0.541176	0.323077	0	0.075
Chenopodiaceae	Salsola	Salsola komarovii	0	0.333333	0.0363636	0.0727273	0.0857143	0.117647	0.0117647	0.169231	0.109091	0
Chenopodiaceae	Salsola	Salsola tragus	0.111111	0.666667	0.163636	0.127273	0.257143	0.141176	0	0.0153846	0	0
Chenopodiaceae	Suaeda	Suaeda glauca	0.222222	1	0.163636	0.490909	0.4	0.258824	0.152941	0.307692	0.2	0
Chenopodiaceae	Suaeda	Suaeda prostrata	0	0	0	0.109091	0	0	0	0	0	0.0125
Chenopodiaceae	Suaeda	Suaeda salsa	0	0.666667	0.290909	0.345455	0.428571	0.211765	0.0117647	0.246154	0.290909	0.0125
Chloranthaceae	Chloranthus	Chloranthus henryi	0	0	0	0	0	0	0.0470588	0.0769231	0.363636	0.15
Chloranthaceae	Chloranthus	Chloranthus multistachys	0	0	0	0	0	0	0.0941176	0.0769231	0.181818	0.0375
Chloranthaceae	Chloranthus	Chloranthus holostegius	0	0	0	0	0	0.0705882	0.0705882	0.261538	0.454545	0.1625
Chloranthaceae	Chloranthus	Chloranthus serratus	0	0	0	0	0	0.0588235	0	0.0923077	0.418182	0.175
Chloranthaceae	Sarcandra	Sarcandra glabra	0	0	0	0	0	0	0	0	0.454545	0.0875
Chloranthaceae	Chloranthus	Chloranthus quadrifolius	0.277778	0.333333	0.254545	0.0727273	0.414286	0.176471	0.129412	0.0769231	0	0.0625
Commelinaceae	Commelina	Commelina benghalensis	0.0555556	0.333333	0.0363636	0	0	0.141176	0.235294	0.276923	0.309091	0.1
Commelinaceae	Murdannia	Murdannia loriformis	0	0	0	0	0	0	0	0	0.145455	0.05
Commelinaceae	Murdannia	Murdannia nudiflora	0	0	0	0	0	0.211765	0.0352941	0.153846	0.272727	0.1625
Commelinaceae	Murdannia	Murdannia triquetra	0.0555556	0	0.0181818	0	0.0714286	0.129412	0.0705882	0.153846	0.418182	0.1
Commelinaceae	Pollia	Pollia japonica	0	0	0	0	0	0	0	0.0923077	0.490909	0.075
Commelinaceae	Streptolirion	Streptolirion volubile	0.333333	0.666667	0.381818	0	0.157143	0	0.105882	0	0.236364	0
Compositae	Adenostemma	Adenostemma lavenia	0	0	0	0	0	0	0	0.0153846	0.345455	0.15
Compositae	Ageratum	Ageratum conyzoides	0	0	0	0.0909091	0	0.176471	0.117647	0.307692	0.818182	0.475
Compositae	Ainsliaea	Ainsliaea fragrans	0	0	0	0	0	0	0	0	0.818182	0.2
Compositae	Ambrosia	Ambrosia artemisiifolia	0.111111	0	0.0363636	0	0.314286	0.0588235	0	0.153846	0.363636	0.5875
Compositae	Anaphalis	Anaphalis aureopunctata	0	0	0	0.0545455	0	0	0.0823529	0	0.0181818	0.0875
Compositae	Anaphalis	Anaphalis sinica	0	0	0.109091	0.472727	0	0.4	0.317647	0.0923077	0.509091	0.225
Compositae	Artemisia	Artemisia anomala	0	0	0	0	0	0	0.0823529	0.107692	0.545455	0.2125
Compositae	Artemisia	Artemisia atrovirens	0	0	0	0.0181818	0	0	0.0235294	0	0.0909091	0
Compositae	Artemisia	Artemisia capillaris	0.444444	0	0.363636	0.181818	0.628571	0.505882	0.223529	0.338462	0.345455	0.2
Compositae	Artemisia	Artemisia chingii	0	0	0.0181818	0.109091	0	0	0.0117647	0.0769231	0	0
Compositae	Artemisia	Artemisia fauriei	0	0.333333	0.0181818	0	0.0714286	0.0588235	0	0	0	0
Compositae	Artemisia	Artemisia igniaria	0.333333	0.333333	0.345455	0.4	0.228571	0.117647	0.0352941	0	0	0
Compositae	Artemisia	Artemisia lactiflora	0	0.333333	0.109091	0.0727273	0	0	0.0352941	0.169231	0.581818	0.3
Compositae	Artemisia	Artemisia rubripes	0.222222	0.333333	0.327273	0.109091	0.414286	0.341176	0.0588235	0	0.0363636	0.025
Compositae	Artemisia	Artemisia selengensis	0.166667	0.333333	0.127273	0	0.2	0.0941176	0.0117647	0.0769231	0	0.0625
Compositae	Artemisia	Artemisia stolonifera	0	0.333333	0.0909091	0.0363636	0.314286	0.0117647	0.0117647	0	0.0363636	0.0125
Compositae	Artemisia	Artemisia sylvatica	0.111111	0	0.0727273	0.163636	0.428571	0.164706	0.0588235	0.153846	0.0909091	0.025
Compositae	Artemisia	Artemisia viridisquama	0	0	0.0181818	0.0181818	0	0	0.0235294	0	0	0
Compositae	Aster	Aster flaccidus	0	0.333333	0.0909091	0.0727273	0	0	0	0	0	0
Compositae	Aster	Aster indicus	0.222222	0	0.0545455	0.181818	0.228571	0.164706	0.305882	0.446154	0.818182	0.425
Compositae	Aster	Aster lautureanus	0.111111	0.666667	0.2	0.181818	0.5	0.376471	0.2	0.0769231	0	0
Compositae	Aster	Aster panduratus	0	0	0	0	0	0	0	0.0769231	0.418182	0.0875
Compositae	Aster	Aster shimadae	0	0	0	0	0	0	0.0941176	0.123077	0.290909	0.225
Compositae	Aster	Aster turbinatus	0	0	0	0	0	0	0	0.0923077	0.763636	0.0375
Compositae	Atractylodes	Atractylodes macrocephala	0	0.666667	0.127273	0.0363636	0	0	0.0117647	0.0769231	0.236364	0.2
Compositae	Bidens	Bidens cernua	0	0	0.0545455	0	0.1	0	0	0	0	0
Compositae	Bidens	Bidens parviflora	0.388889	0.666667	0.490909	0.836364	0.542857	0.564706	0.235294	0.246154	0	0.025
Compositae	Carpesium	Carpesium divaricatum	0.0555556	0	0	0.109091	0.0714286	0	0.164706	0.0307692	0.309091	0.3875
Compositae	Carpesium	Carpesium macrocephalum	0	0	0.0181818	0.0181818	0.0857143	0	0.0823529	0	0	0
Compositae	Carthamus	Carthamus tinctorius	0.0555556	0	0.0363636	0.0181818	0.142857	0.0705882	0	0.0769231	0.309091	0.0125
Compositae	Centaurea	Centaurea cyanus	0.166667	0	0.0363636	0.109091	0.0714286	0.211765	0.0588235	0	0.2	0.075
Compositae	Chorisis	Chorisis repens	0	0	0.0181818	0	0	0.141176	0	0	0.0909091	0
Compositae	Chrysanthemum	Chrysanthemum segetum	0.0555556	0	0	0	0	0.0588235	0	0.0769231	0.0909091	0
Compositae	Cichorium	Cichorium intybus	0	0	0	0.0181818	0.0714286	0	0.0588235	0.0769231	0	0
Compositae	Cirsium	Cirsium chinense	0.0555556	0.333333	0.0181818	0.0181818	0.157143	0.258824	0	0.0153846	0.236364	0.1625
Compositae	Cirsium	Cirsium japonicum	0	0	0.0909091	0.0363636	0.242857	0.352941	0.176471	0.107692	0.618182	0.225
Compositae	Cirsium	Cirsium lineare	0	0	0.0181818	0	0	0.0588235	0.0470588	0.0769231	0.363636	0.2625
Compositae	Cirsium	Cirsium maackii	0	0.333333	0	0	0.357143	0.0235294	0	0.215385	0.236364	0.1375
Compositae	Cirsium	Cirsium arvense	0.333333	0.666667	0.654545	0.745455	0.614286	0.235294	0.411765	0.384615	0.163636	0
Compositae	Conyza	Conyza bonariensis	0	0	0.0545455	0	0	0.141176	0.670588	0.292308	0.309091	0.0125
Compositae	Crepis	Crepis crocea	0.0555556	0.333333	0.163636	0.272727	0	0	0	0	0	0
Compositae	Dendranthema	Chrysanthemum indicum	0	0.333333	0.0363636	0.0181818	0.4	0.247059	0.247059	0.0923077	0.690909	0.1625
Compositae	Echinops	Echinops grijsii	0	0	0	0	0.0857143	0.247059	0.0470588	0.2	0.0181818	0.125
Compositae	Echinops	Echinops pseudosetifer	0.111111	0.333333	0.0727273	0.0181818	0	0	0	0	0	0
Compositae	Emilia	Emilia sonchifolia	0.0555556	0	0	0	0	0.0705882	0.0117647	0.153846	0.890909	0.3
Compositae	Eupatorium	Eupatorium cannabinum	0.0555556	0	0	0	0	0	0	0.0923077	0.127273	0.0625
Compositae	Eupatorium	Eupatorium chinense	0.0555556	0	0	0	0	0.0588235	0.105882	0.107692	0.618182	0.3375
Compositae	Eupatorium	Eupatorium fortunei	0.111111	0.333333	0	0	0	1	0.176471	0.0769231	0.436364	0.1125
Compositae	Eupatorium	Eupatorium japonicum	0	0	0.0181818	0.145455	0.0857143	0.2	0.247059	0.338462	0.654545	0.2875
Compositae	Gnaphalium	Gnaphalium adnatum	0	0	0	0	0	0	0	0	0.163636	0.125
Compositae	Gynura	Gynura japonica	0	0	0	0	0	0	0	0.0769231	0.327273	0.0125
Compositae	Heteropappus	Aster altaicus	0.444444	0.666667	0.890909	0.690909	0.328571	0.4	0.447059	0	0	0.025
Compositae	Heteropappus	Aster hispidus	0.388889	0.666667	0.4	0.454545	0.614286	0.352941	0.223529	0	0.254545	0.1375
Compositae	Heteropappus	Aster neobiennis	0	0.333333	0.0727273	0.127273	0.0142857	0	0	0	0	0.0125
Compositae	Hieracium	Hieracium umbellatum	0.222222	0.333333	0.254545	0.163636	0.414286	0.0117647	0.0823529	0	0.109091	0.0125
Compositae	Hypochaeris	Hypochaeris ciliata	0.111111	0	0.109091	0.0181818	0.228571	0.0588235	0.0588235	0	0	0
Compositae	Ixeridium	Ixeridium dentatum	0	0	0	0	0	0	0	0.0769231	0.163636	0.25
Compositae	Ixeridium	Ixeridium elegans	0.388889	0.333333	0.472727	0.763636	0.4	0.564706	0.376471	0.246154	0.272727	0
Compositae	Ixeridium	Ixeridium strigosum	0.0555556	0	0.0181818	0	0	0	0	0.0769231	0.109091	0
Compositae	Ixeridium	Ixeris chinensis	0.0555556	0.333333	0.309091	0.181818	0.242857	0.376471	0.105882	0.123077	0.2	0
Compositae	Ixeris	Ixeris polycephala	0.111111	0	0.0363636	0.0909091	0.0285714	0.164706	0.0705882	0.184615	0.381818	0.2
Compositae	Lapsana	Lapsana apogonoides	0	0	0	0	0	0	0	0.0923077	0.236364	0.15
Compositae	Ligularia	Ligularia fischeri	0	0.333333	0.109091	0.145455	0.257143	0	0.164706	0	0.0363636	0.175
Compositae	Ligularia	Ligularia intermedia	0.166667	0.666667	0.381818	0.781818	0.0857143	0	0.258824	0.0769231	0.0363636	0.025
Compositae	Ligularia	Ligularia japonica	0	0	0	0	0	0	0	0	0.218182	0.0625
Compositae	Ligularia	Ligularia mongolica	0.0555556	0.333333	0.236364	0	0.0142857	0	0	0	0	0
Compositae	Ligularia	Ligularia stenocephala	0	0	0	0.163636	0	0.0588235	0.129412	0.0769231	0.0727273	0.15
Compositae	Myripnois	Myripnois dioica	0.444444	0.666667	0.490909	0.290909	0.0571429	0	0.0235294	0	0	0
Compositae	Paraixeris	Paraixeris denticulatum	0.111111	0.333333	0.127273	0.0363636	0.0714286	0.141176	0.0117647	0	0.0181818	0
Compositae	Paraprenanthes	Paraprenanthes sororia	0.0555556	0	0	0	0	0	0.0117647	0.0153846	0.309091	0.1625
Compositae	Parasenecio	Parasenecio hastatus	0.0555556	0.333333	0.181818	0.181818	0.0142857	0.0588235	0.0117647	0	0	0
Compositae	Parasenecio	Parasenecio hwangshanicus	0	0	0	0	0	0	0	0	0.0181818	0.0625
Compositae	Parasenecio	Parasenecio matsudae	0	0	0	0	0	0	0	0	0.0181818	0.0625
Compositae	Petasites	Petasites japonicus	0	0	0	0	0	0.0941176	0	0	0.309091	0.0125
Compositae	Prenanthes	Prenanthes tatarinowii	0.388889	0.333333	0.145455	0.236364	0	0	0.105882	0	0	0
Compositae	Pterocypsela	Pterocypsela formosana	0	0	0	0	0	0.0705882	0.152941	0.0153846	0.127273	0.025
Compositae	Pterocypsela	Pterocypsela indica	0.111111	0.333333	0.0363636	0	0.142857	0.129412	0.0823529	0.0769231	0.181818	0.15
Compositae	Pterocypsela	Pterocypsela raddeana	0	0.333333	0.0363636	0	0.0714286	0.0117647	0.0823529	0	0.2	0.1
Compositae	Pyrethrum	Pyrethrum cinerariifolium	0	0.333333	0	0	0	0.117647	0	0.153846	0.0909091	0.0625
Compositae	Saussurea	Saussurea amara	0.277778	0.333333	0.4	0.527273	0.471429	0	0.0235294	0.0769231	0	0
Compositae	Saussurea	Saussurea baicalensis	0.0555556	0.333333	0.0363636	0	0	0	0	0	0	0
Compositae	Saussurea	Saussurea chinnampoensis	0.0555556	0.333333	0.0363636	0	0.0142857	0	0	0	0	0
Compositae	Saussurea	Saussurea cordifolia	0	0	0	0	0.0142857	0	0.0941176	0.0769231	0.0181818	0.1625
Compositae	Saussurea	Saussurea hwangshanensis	0	0	0	0	0	0	0	0	0.0727273	0.0875
Compositae	Saussurea	Saussurea iodostegia	0.222222	0.333333	0.272727	0.254545	0	0	0	0	0	0
Compositae	Saussurea	Saussurea mongolica	0.277778	0.666667	0.181818	0.290909	0.0285714	0.247059	0.0352941	0	0	0
Compositae	Saussurea	Saussurea nivea	0.388889	0.666667	0.309091	0.0727273	0	0	0.0117647	0	0	0
Compositae	Saussurea	Saussurea pectinata	0.388889	0.666667	0.418182	0.163636	0.285714	0	0.0470588	0	0	0
Compositae	Saussurea	Saussurea pulchella	0.111111	0	0.145455	0.0727273	0.5	0	0	0	0	0
Compositae	Saussurea	Saussurea tunglingensis	0.111111	0.666667	0.109091	0	0.0142857	0	0	0	0	0
Compositae	Saussurea	Saussurea ussuriensis	0.277778	0.333333	0.127273	0.436364	0.1	0.117647	0.0235294	0.0769231	0	0
Compositae	Saussurea	Saussurea bullockii	0	0	0	0	0	0	0.0941176	0	0.145455	0.0875
Compositae	Scorzonera	Scorzonera austriaca	0.333333	0.333333	0.163636	0.236364	0.214286	0.176471	0.105882	0.0923077	0	0.0125
Compositae	Scorzonera	Scorzonera sinensis	0.388889	0.666667	0.272727	0.145455	0.342857	0.352941	0.0117647	0.0769231	0	0
Compositae	Senecio	Senecio nemorensis	0.222222	0.333333	0.290909	0.327273	0	0.0705882	0.0117647	0	0.127273	0.1375
Compositae	Senecio	Senecio scandens	0	0	0.0181818	0.0909091	0	0	0.176471	0	0.527273	0.35
Compositae	Serratula	Serratula coronata	0.111111	0.333333	0.0909091	0	0.157143	0.0117647	0.0235294	0.153846	0	0
Compositae	Serratula	Serratula chinense	0	0	0	0	0	0	0.0352941	0	0.2	0.0125
Compositae	Sheareria	Sheareria nana	0	0	0	0	0	0	0	0	0.272727	0.0875
Compositae	Siegesbeckia	Sigesbeckia glabrescens	0	0	0.0181818	0.0363636	0.185714	0	0.0352941	0.153846	0.272727	0.2
Compositae	Siegesbeckia	Sigesbeckia orientalis	0.111111	0	0	0.0909091	0.0714286	0.235294	0.270588	0.384615	0.381818	0.2125
Compositae	Sinosenecio	Sinosenecio oldhamianus	0	0	0	0.0909091	0	0	0.129412	0	0.181818	0.2625
Compositae	Solidago	Solidago decurrens	0.111111	0	0.0181818	0	0	0.0588235	0.0705882	0.169231	0.763636	0.2125
Compositae	Sonchus	Sonchus oleraceus	0.222222	0	0.181818	0.236364	0.228571	0.2	0.447059	0.876923	0.927273	0.8875
Compositae	Sonchus	Sonchus asper	0	0.0666667	0	0.0181818	0.0714286	0.329412	0.294118	0.938462	0.963636	0.9
Compositae	Sonchus	Sonchus uliginosus	0	0	0.127273	0.309091	0.0857143	0	0.0470588	0	0	0
Compositae	Syneilesis	Syneilesis australis	0	0	0	0	0	0	0	0	0.0181818	0.0625
Compositae	Synurus	Synurus deltoides	0.111111	0.333333	0.2	0.0181818	0.342857	0	0.141176	0	0.127273	0.1125
Compositae	Taraxacum	Taraxacum mongolicum	0.5	0	0.527273	0.418182	0.628571	0.4	0.352941	0.153846	0.509091	0.2875
Compositae	Tephroseris	Tephroseris pierotii	0	0	0	0	0	0	0	0.153846	0.145455	0
Compositae	Tripolium	Tripolium pannonicum	0.166667	0.4	0.254545	0.327273	0.457143	0.129412	0.0117647	0	0.0909091	0
Compositae	Turczaninowia	Turczaninovia fastigiata	0	0	0	0	0.442857	0.282353	0.0117647	0	0	0
Compositae	Youngia	Youngia erythrocarpa	0	0	0	0	0	0	0	0.0769231	0.381818	0.075
Compositae	Youngia	Youngia japonica	0.166667	0	0.0363636	0.109091	0	0.447059	0.482353	0.338462	0.6	0.3125
Compositae	Youngia	Youngia japonica subsp. longiflora	0	0	0	0	0	0.0588235	0	0.0769231	0.145455	0.0625
Compositae	Achillea	Achillea alpina	0.333333	0.333333	0.272727	0.309091	0.271429	0	0.0588235	0.0769231	0.0909091	0
Compositae	Achillea	Achillea wilsoniana	0	0	0	0.0727273	0	0	0.0117647	0	0	0
Compositae	Acroptilon	Acroptilon repens	0	0.333333	0.0181818	0.109091	0	0	0	0	0	0
Compositae	Ajania	Ajania parviflora	0.0555556	0.333333	0.0727273	0.0363636	0	0	0	0	0	0
Compositae	Anaphalis	Anaphalis hancockii	0.166667	0.333333	0.254545	0.309091	0	0	0	0	0	0
Compositae	Artemisia	Artemisia anethifolia	0	0	0	0.163636	0.0142857	0.0588235	0.0705882	0.0153846	0	0
Compositae	Artemisia	Artemisia anethoides	0	0.333333	0.109091	0.418182	0.1	0.105882	0.0705882	0	0	0
Compositae	Artemisia	Artemisia angustissima	0.0555556	0	0.0363636	0	0.0714286	0.0705882	0	0	0	0
Compositae	Artemisia	Artemisia brachyloba	0	0.333333	0.181818	0.109091	0.0857143	0	0	0	0	0
Compositae	Artemisia	Artemisia desertorum	0.111111	0.333333	0.0727273	0.363636	0.0142857	0	0	0	0	0
Compositae	Artemisia	Artemisia dracunculus	0.111111	0.333333	0.109091	0.109091	0.0714286	0	0	0	0	0
Compositae	Artemisia	Artemisia eriopoda	0.277778	0.666667	0.454545	0.527273	0.285714	0.447059	0.164706	0.0923077	0	0.15
Compositae	Artemisia	Artemisia frigida	0	0.333333	0.109091	0.254545	0.0142857	0	0.0235294	0	0.0181818	0
Compositae	Artemisia	Artemisia gansuensis	0	0.333333	0.0181818	0.0181818	0	0	0	0	0	0
Compositae	Artemisia	Artemisia giraldii	0.166667	0.333333	0.2	0.8	0	0	0.0235294	0	0	0
Compositae	Artemisia	Artemisia halodendron	0	0	0.0727273	0.0181818	0.228571	0	0	0	0	0
Compositae	Artemisia	Artemisia leucophylla	0	0	0	0.272727	0	0.0117647	0	0	0	0
Compositae	Artemisia	Artemisia macilenta	0.0555556	0.333333	0.0545455	0.0363636	0.0714286	0	0	0	0	0
Compositae	Artemisia	Artemisia mongolica	0.222222	0	0.218182	0.472727	0.2	0.0705882	0.247059	0.230769	0	0
Compositae	Artemisia	Artemisia ordosica	0	0	0.0181818	0.0909091	0.0714286	0	0	0	0	0
Compositae	Artemisia	Artemisia oxycephala	0	0	0.0181818	0	0.0285714	0	0.0117647	0	0	0
Compositae	Artemisia	Artemisia princeps	0	0	0.0727273	0.0363636	0.114286	0.0823529	0.0352941	0	0	0
Compositae	Artemisia	Artemisia pubescens	0.0555556	0.333333	0.0545455	0	0	0	0	0	0	0
Compositae	Artemisia	Artemisia sieversiana	0.333333	0.333333	0.381818	0.509091	0.342857	0.0941176	0.0352941	0.0769231	0	0
Compositae	Artemisia	Artemisia subulata	0	0.333333	0.0363636	0.0181818	0.0857143	0	0	0	0	0
Compositae	Artemisia	Artemisia tanacetifolia	0.111111	0.333333	0.0545455	0.0909091	0.0142857	0	0	0	0	0
Compositae	Artemisia	Artemisia verbenacea	0	0.333333	0.0727273	0.0545455	0.114286	0	0	0	0	0
Compositae	Aster	Aster alpinus	0.0555556	0	0.0909091	0.0363636	0	0	0	0	0	0
Compositae	Aster	Aster farreri	0	0.333333	0.0363636	0.0363636	0	0	0.0117647	0	0.0909091	0
Compositae	Brachyactis	Brachyactis ciliatum	0.0555556	0.333333	0.109091	0.109091	0.414286	0	0	0	0	0.0125
Compositae	Cirsium	Cirsium leo	0.111111	0.333333	0.127273	0.490909	0	0	0.176471	0	0	0
Compositae	Cirsium	Cirsium pendulum	0.166667	0.333333	0.236364	0.163636	0.1	0	0.105882	0	0	0
Compositae	Cirsium	Cirsium shansiense	0	0	0.0545455	0.236364	0	0	0.0705882	0	0	0.0125
Compositae	Cirsium	Cirsium vlassovianum	0.0555556	0.333333	0.0363636	0.0181818	0.414286	0	0	0	0	0
Compositae	Dendranthema	Dendranthema chanetii	0.444444	0.333333	0.327273	0.472727	0.342857	0.129412	0.0235294	0	0	0
Compositae	Dendranthema	Dendranthema oreastrum	0	0	0.0181818	0.0363636	0	0	0	0	0	0
Compositae	Dendranthema	Dendranthema zawadskii	0.166667	0.666667	0.163636	0.0181818	0.0714286	0	0	0	0.0181818	0.075
Compositae	Echinops	Echinops davuricus	0.388889	0.666667	0.254545	0.345455	0.0714286	0.117647	0.0588235	0	0	0
Compositae	Echinops	Echinops gmelinii	0	0.333333	0.0545455	0.181818	0.0857143	0	0.0588235	0	0	0
Compositae	Erigeron	Erigeron acris	0.166667	0.333333	0.2	0.145455	0.128571	0.0588235	0	0	0	0.025
Compositae	Erigeron	Erigeron acris subsp. kamtschaticus	0.0555556	0.333333	0.0727273	0.0909091	0	0	0.0117647	0	0	0
Compositae	Erigeron	Erigeron acris subsp. politus	0.0555556	0.333333	0.0727273	0.0363636	0	0	0	0	0	0
Compositae	Filifolium	Filifolium sibiricum	0.222222	0.666667	0.272727	0.363636	0.342857	0	0.0117647	0	0	0
Compositae	Heteropappus	Heteropappus meyendorffii	0.0555556	0.333333	0.0363636	0.0363636	0.0142857	0	0	0	0	0.0125
Compositae	Inula	Inula salsoloides	0	0.333333	0.109091	0.327273	0	0	0.0705882	0	0	0
Compositae	Ixeridium	Ixeridium denticulata	0	0	0	0.0181818	0	0	0.0235294	0	0	0
Compositae	Kalimeris	Kalimeris mongolicus	0.222222	0.333333	0.181818	0.0727273	0.4	0.2	0.0588235	0.0769231	0.0181818	0
Compositae	Leontopodium	Leontopodium junpeianum	0.222222	0.333333	0.290909	0.254545	0	0	0	0	0	0
Compositae	Leontopodium	Leontopodium leontopodioides	0.388889	0.666667	0.636364	0.818182	0.771429	0.4	0.0823529	0	0	0.0125
Compositae	Leontopodium	Leontopodium smithianum	0.166667	0.333333	0.272727	0.2	0	0	0	0	0	0
Compositae	Ligularia	Ligularia dentata	0	0	0.0181818	0.309091	0	0	0.129412	0	0.0181818	0.0875
Compositae	Ligularia	Ligularia przewalskii	0.0555556	0	0	0.0545455	0	0	0	0	0	0
Compositae	Ligularia	Ligularia sibirica	0.277778	0	0.145455	0.0909091	0.0714286	0	0.2	0	0	0
Compositae	Ligularia	Ligularia xanthotricha	0	0	0.0545455	0.0909091	0	0	0	0	0	0
Compositae	Mulgedium	Mulgedium tatarica	0.111111	0.333333	0.327273	0.581818	0.1	0.329412	0.0823529	0	0.0909091	0
Compositae	Olgaea	Olgaea lomonossowii	0.111111	0.333333	0.236364	0.0545455	0	0	0	0	0	0
Compositae	Opisthopappus	Opisthopappus taihangensis	0	0	0.0363636	0.109091	0	0	0.0941176	0	0	0
Compositae	Parasenecio	Parasenecio ambiguus	0	0	0.0545455	0.0545455	0	0	0.0941176	0	0.0181818	0
Compositae	Pertya	Pertya sinensis	0	0	0	0.0545455	0	0	0.0470588	0	0	0
Compositae	Picris	Picris hieracioides	0.222222	0.333333	0.272727	0.4	0.4	0.0823529	0.117647	0.169231	0	0.0125
Compositae	Prenanthes	Prenanthes tatarinowii	0.222222	0.333333	0.127273	0.345455	0.214286	0.0588235	0.129412	0	0	0
Compositae	Pterocypsela	Pterocypsela raddeana	0	0	0.0363636	0	0.0857143	0.117647	0.0588235	0	0	0.0125
Compositae	Pterocypsela	Pterocypsela triangulata	0.0555556	0.333333	0.0181818	0.0181818	0	0	0	0	0	0
Compositae	Saussurea	Saussurea frondosa	0	0	0	0.127273	0	0	0.0588235	0	0	0
Compositae	Saussurea	Saussurea parviflora	0	0.333333	0.109091	0.0727273	0	0	0	0	0	0
Compositae	Scorzonera	Scorzonera divaricata	0	0.333333	0.145455	0.345455	0	0.0588235	0	0	0	0
Compositae	Scorzonera	Scorzonera mongolica	0	0.333333	0.145455	0.145455	0.257143	0.141176	0.0588235	0.0923077	0	0
Compositae	Senecio	Senecio argunensis	0.333333	0.666667	0.327273	0.563636	0.471429	0.0117647	0.164706	0	0	0.025
Compositae	Serratula	Serratula centauroides	0.277778	0.333333	0.454545	0.818182	0.114286	0.0117647	0.0823529	0	0	0
Compositae	Serratula	Serratula chanetii	0.111111	0.333333	0.327273	0.290909	0	0.0588235	0.0823529	0	0	0
Compositae	Serratula	Serratula cupuliformis	0	0.333333	0.0727273	0.290909	0.0428571	0	0	0	0	0
Compositae	Serratula	Serratula polycephala	0.222222	0.333333	0.163636	0.272727	0.128571	0	0	0	0	0
Compositae	Serratula	Serratula strangulata	0	0.333333	0.0909091	0.0909091	0	0	0.0117647	0	0	0
Compositae	Sinacalia	Sinacalia tangutica	0	0	0.0181818	0.145455	0	0	0	0	0	0.0125
Compositae	Sonchus	Sonchus brachyotus	0.333333	0.333333	0.454545	0.454545	0.442857	0.411765	0.0941176	0	0.0909091	0
Compositae	Sonchus	Sonchus transcaspicus	0	0	0.0181818	0	0.0714286	0	0.0117647	0	0	0
Compositae	Stemmacantha	Stemmacantha uniflorum	0.444444	0.333333	0.327273	0.327273	0.171429	0.341176	0.117647	0	0	0
Compositae	Taraxacum	Taraxacum nutans	0	0	0.0363636	0.109091	0	0	0	0	0	0
Compositae	Taraxacum	Taraxacum platypecidum	0.222222	0.333333	0.145455	0.236364	0.0857143	0.0588235	0	0	0	0
Compositae	Taraxacum	Taraxacum sinicum	0.0555556	0	0	0.0545455	0.0714286	0.188235	0	0	0	0
Compositae	Taraxacum	Taraxacum scariosum	0.0555556	0	0.0727273	0.309091	0.471429	0	0	0	0	0
Convolvulaceae	Calystegia	Calystegia pellita	0.277778	0.666667	0.163636	0.436364	0.385714	0.494118	0.105882	0.430769	0	0.0625
Convolvulaceae	Calystegia	Calystegia soldanella	0	0.333333	0.0545455	0	0.185714	0.258824	0	0.0923077	0.163636	0
Convolvulaceae	Convolvulus	Convolvulus ammannii	0	0.333333	0.181818	0.236364	0.0285714	0	0.0117647	0	0	0
Convolvulaceae	Convolvulus	Convolvulus arvensis	0.277778	0.4	0.563636	0.836364	0.357143	0.329412	0.294118	0.261538	0	0.0125
Convolvulaceae	Convolvulus	Convolvulus tragacanthoides	0	0.333333	0.145455	0.0545455	0.0142857	0	0	0	0	0
Convolvulaceae	Cuscuta	Cuscuta australis	0.0555556	0.333333	0.0181818	0	0.214286	0.141176	0.0117647	0.4	0.0181818	0.175
Convolvulaceae	Cuscuta	Cuscuta lupuliformis	0.0555556	0.333333	0.2	0.0727273	0.228571	0.129412	0.0117647	0	0	0
Convolvulaceae	Evolvulus	Evolvulus alsinoides	0	0	0	0	0	0	0	0.0923077	0.309091	0.075
Convolvulaceae	Ipomoea	Ipomoea triloba	0	0	0	0	0	0	0	0.0769231	0.818182	0.75
Convolvulaceae	Merremia	Merremia sibirica	0.277778	0.666667	0.145455	0	0.0714286	0.117647	0.0117647	0.0923077	0.163636	0.1375
Coriariaceae	Coriaria	Coriaria nepalensis	0	0.333333	0	0	0	0	0.0235294	0	0.0181818	0
Cornaceae	Bothrocaryum	Bothrocaryum controversum	0	0	0	0.0181818	0.0142857	0.364706	0.0823529	0	0.0181818	0.0625
Cornaceae	Swida	Swida walteri	0	0	0.0363636	0.145455	0	0.788235	0.0235294	0.0923077	0	0
Cornaceae	Swida	Swida wilsoniana	0	0	0	0	0	0	0.0705882	0	0	0.0125
Cornaceae	Swida	Swida alba	0	0	0.0909091	0.127273	0	1	0.152941	0	0	0
Cornaceae	Swida	Swida bretschneideri	0	0	0.0181818	0.109091	0	0	0.0235294	0	0	0
Cornaceae	Swida	Swida bretschneideri var. crispa	0	0	0.0363636	0.218182	0	0	0	0	0	0
Crassulaceae	Hylotelephium	Hylotelephium pallescens	0.0555556	0.333333	0.0909091	0.236364	0.157143	0	0.0235294	0	0	0
Crassulaceae	Hylotelephium	Hylotelephium spectabile	0.111111	0.333333	0.0545455	0	0.285714	0.0823529	0.0117647	0	0	0.0125
Crassulaceae	Rhodiola	Rhodiola dumulosa	0.222222	0.333333	0.127273	0.2	0	0	0	0	0	0
Crassulaceae	Rhodiola	Rhodiola kirilowii	0.166667	0.333333	0.127273	0.145455	0	0	0	0	0	0
Crassulaceae	Rhodiola	Rhodiola rosea	0.0555556	0.333333	0.109091	0.0909091	0	0	0	0	0	0
Crassulaceae	Sedum	Sedum stellariifolium	0.333333	0	0.127273	0.309091	0	0.105882	0.2	0	0	0.025
Crassulaceae	Sedum	Sedum subtile	0	0	0	0.0909091	0	0	0.0588235	0	0.254545	0
Crassulaceae	Hylotelephium	Hylotelephium mingjinianum	0	0	0	0	0	0	0	0	0.218182	0.1125
Crassulaceae	Hylotelephium	Hylotelephium verticillatum	0	0.333333	0.0909091	0.109091	0.0428571	0.0117647	0.0588235	0.0153846	0.145455	0.0875
Crassulaceae	Sedum	Sedum alfredii	0	0	0	0	0	0	0	0.246154	0.672727	0.1
Crassulaceae	Sedum	Sedum bulbiferum	0	0	0	0	0	0	0	0.2	0.563636	0.1625
Crassulaceae	Sedum	Sedum drymarioides	0.111111	0	0.0363636	0	0	0	0.0117647	0.153846	0.636364	0.2
Crassulaceae	Sedum	Sedum emarginatum	0	0	0	0	0	0	0.0588235	0.169231	0.381818	0.125
Crassulaceae	Sedum	Sedum filipes	0	0	0	0	0	0	0.0470588	0	0	0.0125
Crassulaceae	Sedum	Sedum leptophyllum	0	0	0	0	0	0	0.0117647	0	0.163636	0.1875
Crassulaceae	Sedum	Sedum lineare	0	0	0	0.0181818	0.0714286	0	0.152941	0.169231	0.309091	0.075
Crassulaceae	Sedum	Sedum makinoi	0	0	0	0	0	0	0	0	0.218182	0.0625
Crassulaceae	Sedum	Sedum onychopetalum	0	0	0	0	0	0	0	0.153846	0.218182	0.025
Crassulaceae	Sedum	Sedum polytrichoides	0	0	0	0	0.0142857	0.0588235	0.0117647	0	0.254545	0.2375
Crassulaceae	Sedum	Sedum tetractinum	0	0	0	0	0	0	0	0	0.0181818	0.0125
Crassulaceae	Sedum	Sedum japonicum	0	0	0	0	0	0	0	0	0.163636	0.1375
Cucurbitaceae	Gynostemma	Gynostemma yixingense	0	0	0	0	0	0	0	0.0153846	0.0909091	0
Cucurbitaceae	Luffa	Luffa acutangula	0.0555556	0	0	0	0	0	0	0	0.0181818	0
Cucurbitaceae	Momordica	Momordica charantia	0.0555556	0.666667	0	0	0.0714286	0.0705882	0.0588235	0.153846	0.145455	0.025
Cucurbitaceae	Thladiantha	Thladiantha punctata	0	0	0	0	0	0	0	0	0.272727	0.175
Cucurbitaceae	Zehneria	Zehneria japonica	0	0	0	0	0	0.117647	0.0588235	0.169231	0.309091	0.1
Cucurbitaceae	Bolbostemma	Bolbostemma paniculatum	0.388889	0.666667	0.109091	0.109091	0.142857	0.0705882	0.0117647	0	0	0
Cucurbitaceae	Thladiantha	Thladiantha dubia	0.388889	0.333333	0.290909	0.509091	0.271429	0.305882	0.176471	0.0769231	0	0
Cupressaceae	Chamaecyparis	Chamaecyparis lawsoniana	0	0	0	0	0	0	0	0.0769231	0.0909091	0
Cupressaceae	Chamaecyparis	Chamaecyparis obtusa	0	0	0.0181818	0	0	0.117647	0.0588235	0.0769231	0.181818	0
Cupressaceae	Chamaecyparis	Chamaecyparis pisifera	0	0	0.0181818	0	0.0714286	0.411765	0.0588235	0.169231	0.109091	0.0625
Cupressaceae	Cryptomeria	Cryptomeria japonica	0	0	0	0.0909091	0	0.2	0.0941176	0.492308	0.418182	0.0625
Cupressaceae	Cunninghamia	Cunninghamia lanceolata	0.0555556	0	0	0	0	0.458824	0.0823529	0.353846	0.672727	0.225
Cupressaceae	Cupressus	Cupressus funebris	0.0555556	0	0	0.0181818	0	0.176471	0	0.246154	0.472727	0.0875
Cupressaceae	Juniperus	Juniperus formosana	0	0	0	0.0181818	0	0.0588235	0.0823529	0.323077	0.472727	0.225
Cupressaceae	Juniperus	Juniperus rigida	0.111111	0.333333	0.145455	0.418182	0.171429	0.117647	0.0705882	0.0769231	0	0
Cupressaceae	Sequoia	Sequoia sempervirens	0	0	0	0	0	0	0	0.0769231	0.0909091	0
Cupressaceae	Sequoiadendron	Sequoiadendron giganteum	0	0	0	0	0	0	0	0.0769231	0.0909091	0
Cupressaceae	Taxodium	Taxodium distichum	0	0	0	0	0	0.152941	0.141176	0.153846	0.0909091	0.0625
Cupressaceae	Thuja	Thuja occidentalis	0.0555556	0	0	0	0	0.176471	0.0588235	0.0769231	0.0909091	0.0625
Cupressaceae	Thuja	Thuja standishii	0	0	0	0	0	0.0705882	0	0.0769231	0	0
Cupressaceae	Thujopsis	Thujopsis dolabrata	0	0	0	0	0.0714286	0.0588235	0.0588235	0.0769231	0.0909091	0.075
Cycadaceae	Cycas	Cycas revoluta	0	0	0	0	0	0.0588235	0	0	0.0909091	0.075
Cyperaceae	Bolboschoenus	Bolboschoenus yagara	0	0	0	0	0.142857	0.117647	0.0588235	0.153846	0	0
Cyperaceae	Bolboschoenus	Bolboschoenus planiculmis	0.222222	0.4	0.181818	0.236364	0.485714	0.141176	0.0470588	0.2	0.0909091	0
Cyperaceae	Bulbostylis	Bulbostylis barbata	0.0555556	0	0.0363636	0	0.228571	0.458824	0.141176	0.0769231	0.327273	0.125
Cyperaceae	Bulbostylis	Bulbostylis densa	0	0	0.0181818	0	0.142857	0.211765	0	0.0769231	0.418182	0.0875
Cyperaceae	Carex	Carex argyi	0	0	0	0	0.0714286	0	0	0.0769231	0.0909091	0.075
Cyperaceae	Carex	Carex brownii	0	0	0	0	0.0142857	0	0.0117647	0.0769231	0.0909091	0.075
Cyperaceae	Carex	Carex brunnea	0	0	0	0	0	0	0	0.0923077	0.490909	0.1125
Cyperaceae	Carex	Carex capillacea	0	0	0	0	0.157143	0.0117647	0	0	0.0727273	0
Cyperaceae	Carex	Carex cinerascens	0	0.333333	0.0181818	0	0.157143	0	0	0.0153846	0.0181818	0.075
Cyperaceae	Carex	Carex cranaocarpa	0	0.333333	0.0363636	0.0363636	0	0	0	0	0	0
Cyperaceae	Carex	Carex davidii	0	0	0	0	0	0	0.0588235	0	0	0.025
Cyperaceae	Carex	Carex dimorpholepis	0	0	0	0	0.0714286	0.0705882	0.117647	0.0769231	0.127273	0.075
Cyperaceae	Carex	Carex dispalata	0	0	0	0	0.228571	0	0	0	0.236364	0.0625
Cyperaceae	Carex	Carex doniana	0	0	0	0	0	0	0.0352941	0	0.272727	0.0875
Cyperaceae	Carex	Carex foraminata	0	0	0	0	0	0	0	0	0.145455	0.075
Cyperaceae	Carex	Carex gibba	0	0	0	0	0.0714286	0	0.0117647	0.0769231	0.436364	0.2
Cyperaceae	Carex	Carex hancockiana	0.222222	0.333333	0.109091	0.0909091	0	0	0	0	0	0
Cyperaceae	Carex	Carex heterolepis	0.333333	0.333333	0.0727273	0.0727273	0.0857143	0.0823529	0.0117647	0	0	0
Cyperaceae	Carex	Carex heterostachya	0.222222	0.0666667	0.0545455	0.0909091	0.185714	0.129412	0.0705882	0	0	0
Cyperaceae	Carex	Carex ischnostachya	0	0	0	0	0	0	0	0.0769231	0.290909	0.1625
Cyperaceae	Carex	Carex japonica	0	0	0	0.109091	0.0714286	0.0117647	0.0117647	0.0769231	0.181818	0.0375
Cyperaceae	Carex	Carex karoi	0.0555556	0	0.0181818	0.0181818	0.0142857	0	0	0	0	0
Cyperaceae	Carex	Carex kobomugi	0	0.333333	0.0181818	0	0.314286	0.2	0	0	0.181818	0
Cyperaceae	Carex	Carex laticeps	0	0	0	0	0	0	0	0.153846	0.127273	0.075
Cyperaceae	Carex	Carex leiorhyncha	0.222222	0.666667	0.181818	0.145455	0.6	0.176471	0	0	0	0
Cyperaceae	Carex	Carex ligulata	0	0	0	0	0	0	0	0.0153846	0.563636	0.175
Cyperaceae	Carex	Carex lithophila	0.111111	0	0.0181818	0	0.0857143	0	0	0	0	0
Cyperaceae	Carex	Carex maackii	0	0	0	0	0.214286	0	0	0	0.127273	0.0125
Cyperaceae	Carex	Carex nemostachys	0	0	0	0	0	0	0	0.0923077	0.236364	0.2375
Cyperaceae	Carex	Carex onoei	0.111111	0	0	0.0181818	0.171429	0	0	0	0	0
Cyperaceae	Carex	Carex peiktusani	0	0.333333	0.0181818	0	0	0	0	0	0	0
Cyperaceae	Carex	Carex phacota	0	0	0	0	0	0	0	0	0.145455	0.0625
Cyperaceae	Carex	Carex pruinosa	0	0	0	0	0	0	0.0588235	0	0.236364	0.1375
Cyperaceae	Carex	Carex pumila	0	0	0.0181818	0	0.114286	0.0588235	0	0	0.109091	0
Cyperaceae	Carex	Carex raddei	0.111111	0.333333	0.0545455	0	0.0857143	0.105882	0.0117647	0.169231	0	0.0625
Cyperaceae	Carex	Carex remotiuscula	0.111111	0	0.109091	0.181818	0	0	0.0352941	0	0	0.0125
Cyperaceae	Carex	Carex scabrifolia	0	0	0	0	0.228571	0	0	0.246154	0.0909091	0
Cyperaceae	Carex	Carex serreana	0	0.333333	0.0181818	0.0181818	0	0	0	0	0	0
Cyperaceae	Carex	Carex stipitinux	0	0	0	0	0	0	0	0	0.272727	0.025
Cyperaceae	Carex	Carex tangiana	0.111111	0.333333	0.0181818	0	0	0	0	0	0	0
Cyperaceae	Carex	Carex teinogyna	0	0	0	0	0	0	0.0117647	0	0.0909091	0.025
Cyperaceae	Carex	Carex transversa	0	0	0	0	0	0	0	0.153846	0.236364	0.075
Cyperaceae	Carex	Carex ussuriensis	0	0.333333	0	0.0181818	0.0142857	0	0	0	0	0
Cyperaceae	Carex	Carex duriuscula	0.388889	0.333333	0.236364	0.4	0.0285714	0.376471	0.0235294	0	0	0
Cyperaceae	Carex	Carex mitrata	0	0.0666667	0	0	0	0	0	0.0769231	0.0545455	0
Cyperaceae	Cyperus	Cyperus amuricus	0.166667	0	0.0545455	0.0181818	0.4	0.294118	0.129412	0.153846	0.0909091	0.1
Cyperaceae	Cyperus	Cyperus compressus	0	0	0	0.0909091	0.142857	0.129412	0.129412	0.184615	0.218182	0.15
Cyperaceae	Cyperus	Cyperus nipponicus	0.166667	0.333333	0.0181818	0.0909091	0.357143	0.129412	0	0.107692	0.181818	0
Cyperaceae	Cyperus	Cyperus pannonicus	0	0	0	0	0.0142857	0	0.0117647	0	0.0181818	0
Cyperaceae	Cyperus	Cyperus michelianus	0.166667	0	0.0909091	0	0.142857	0.211765	0.0470588	0.0153846	0	0.075
Cyperaceae	Fimbristylis	Fimbristylis bisumbellata	0	0	0.0545455	0	0	0.141176	0.0705882	0.0769231	0.0909091	0
Cyperaceae	Fimbristylis	Fimbristylis littoralis	0	0	0	0	0	0.0705882	0.105882	0.323077	0.545455	0.2125
Cyperaceae	Fimbristylis	Fimbristylis longispica	0	0	0	0	0.0714286	0	0	0.0153846	0.2	0
Cyperaceae	Fimbristylis	Fimbristylis stauntonii	0.0555556	0	0.0545455	0	0.285714	0.0235294	0.0941176	0.0769231	0.0909091	0
Cyperaceae	Fimbristylis	Fimbristylis subbispicata	0.111111	0	0.0727273	0.0363636	0.142857	0.258824	0.0352941	0.261538	0.254545	0
Cyperaceae	Fimbristylis	Fimbristylis complanata	0	0	0	0	0	0.0588235	0	0	0.0181818	0
Cyperaceae	Fimbristylis	Fimbristylis rigidula	0	0	0	0	0	0	0	0	0.0909091	0.075
Cyperaceae	Kobresia	Kobresia macroprophylla	0.0555556	0.333333	0	0	0	0	0	0	0	0
Cyperaceae	Kyllinga	Kyllinga brevifolia	0	0	0.0545455	0	0.228571	0.305882	0.0235294	0.0769231	0.0545455	0.0625
Cyperaceae	Pycreus	Pycreus flavidus	0.0555556	0	0	0	0	1	0	0	0.2	0
Cyperaceae	Pycreus	Pycreus sanguinolentus	0	0	0	0.0181818	0	0.470588	0	0	0	0.0125
Cyperaceae	Rhynchospora	Rhynchospora chinensis	0	0	0	0	0	0	0	0.169231	0.145455	0
Cyperaceae	Scirpus	Scirpus karuisawensis	0	0	0	0.0181818	0.0714286	0.0705882	0.129412	0.184615	0.0181818	0.0125
Cyperaceae	Scirpus	Scirpus orientalis	0.0555556	0.333333	0.0181818	0	0	0	0	0	0	0
Cyperaceae	Trichophorum	Trichophorum subcapitatum	0	0	0	0	0	0	0.0117647	0	0.145455	0.075
Cyperaceae	Carex	Carex forficula	0.0555556	0	0.0181818	0	0.214286	0.0588235	0	0	0	0
Daphniphyllaceae	Daphniphyllum	Daphniphyllum macropodum	0	0	0	0	0	0	0	0	0.563636	0.1875
Dioscoreaceae	Dioscorea	Dioscorea bulbifera	0	0	0	0.0181818	0	0	0.0705882	0.0769231	0.472727	0.075
Dioscoreaceae	Dioscorea	Dioscorea gracillima	0	0	0	0	0	0	0	0	0.709091	0.1375
Dioscoreaceae	Dioscorea	Dioscorea japonica	0	0	0.0181818	0	0.0714286	0	0.0823529	0.0923077	0.690909	0.375
Dioscoreaceae	Dioscorea	Dioscorea nipponica	0.388889	0.666667	0.581818	0.8	0.7	0.411765	0.352941	0	0.436364	0.0875
Dioscoreaceae	Dioscorea	Dioscorea tenuipes	0	0	0	0	0	0.0588235	0	0	0.563636	0.025
Dioscoreaceae	Dioscorea	Dioscorea tokoro	0	0	0	0	0	0	0.0705882	0	0.636364	0
Dipsacaceae	Scabiosa	Scabiosa comosa	0.0555556	0	0.0545455	0.163636	0	0	0	0	0	0
Droseraceae	Drosera	Drosera peltata	0	0	0	0	0	0	0	0.0153846	0.527273	0.0125
Ebenaceae	Diospyros	Diospyros kaki	0.277778	0	0.0545455	0.236364	0.1	0.823529	0.164706	0.353846	0.8	0.2875
Ebenaceae	Diospyros	Diospyros lotus	0.388889	0.666667	0.145455	0.4	0	1	0.270588	0.0923077	0.109091	0.05
Ebenaceae	Diospyros	Diospyros oleifera	0	0	0	0	0	0	0	0.0769231	0.327273	0.0125
Ebenaceae	Diospyros	Diospyros rhombifolia	0	0	0	0	0	0.0588235	0	0.2	0.527273	0.25
Elaeagnaceae	Elaeagnus	Elaeagnus angustifolia	0.111111	0	0.0545455	0	0.157143	0.129412	0.164706	0	0	0
Elaeagnaceae	Elaeagnus	Elaeagnus argyi	0	0	0	0	0	0	0.0117647	0.261538	0.145455	0.0875
Elaeagnaceae	Elaeagnus	Elaeagnus courtoisii	0	0	0	0	0	0	0	0	0.0909091	0.0625
Elaeagnaceae	Elaeagnus	Elaeagnus glabra	0	0	0	0	0	0	0.0588235	0.0923077	0.4	0.125
Elaeagnaceae	Elaeagnus	Elaeagnus henryi	0	0	0	0	0	0	0	0.0769231	0.181818	0.025
Elaeagnaceae	Elaeagnus	Elaeagnus macrophylla	0	0	0	0	0	0.0588235	0	0.0769231	0.0909091	0
Elaeagnaceae	Elaeagnus	Elaeagnus multiflora	0.0555556	0	0.0909091	0	0.0714286	0.305882	0.176471	0.246154	0.436364	0.35
Elaeagnaceae	Elaeagnus	Elaeagnus pungens	0	0	0	0.127273	0	0.235294	0.329412	0.353846	0.636364	0.4125
Elaeagnaceae	Hippophae	Hippophae rhamnoides	0.166667	0.333333	0.254545	0.545455	0	0	0.0117647	0	0	0
Elaeocarpaceae	Elaeocarpus	Elaeocarpus japonicus	0	0	0	0	0	0	0	0	0.363636	0.075
Elaeocarpaceae	Elaeocarpus	Elaeocarpus glabripetalus	0	0	0	0	0	0	0	0	0.4	0.0875
Ephedraceae	Ephedra	Ephedra equisetina	0.111111	0.333333	0.218182	0.436364	0	0.0588235	0	0	0	0
Ephedraceae	Ephedra	Ephedra intermedia	0	0	0.0363636	0.0363636	0.0714286	0.0117647	0	0	0	0
Ephedraceae	Ephedra	Ephedra monosperma	0.111111	0	0.109091	0.0181818	0	0	0	0	0	0
Ephedraceae	Ephedra	Ephedra sinica	0.0555556	0.333333	0.254545	0.327273	0.0428571	0	0	0	0.0909091	0
Ericaceae	Enkianthus	Enkianthus chinensis	0	0	0	0	0	0	0	0.0769231	0.272727	0.075
Ericaceae	Lyonia	Lyonia ovalifolia var. hebecarpa	0	0	0	0	0	0	0	0	0.6	0.1875
Ericaceae	Lyonia	Lyonia ovalifolia var. elliptica	0	0	0	0	0	0	0	0.0769231	0.563636	0.1125
Ericaceae	Pieris	Pieris japonica	0	0	0	0	0	0	0	0.0769231	0.527273	0.175
Ericaceae	Rhododendron	Rhododendron × pulchrum	0	0	0	0	0	0.0588235	0.0117647	0	0.109091	0.0625
Ericaceae	Rhododendron	Rhododendron discolor	0	0	0	0	0	0	0.0117647	0	0.0363636	0.0625
Ericaceae	Rhododendron	Rhododendron fortunei	0	0	0.0181818	0	0	0	0.0235294	0	0.563636	0.1
Ericaceae	Rhododendron	Rhododendron latoucheae	0	0	0	0	0	0	0	0	0.545455	0.0375
Ericaceae	Rhododendron	Rhododendron maculiferum	0	0	0.0181818	0	0	0	0	0	0	0.025
Ericaceae	Rhododendron	Rhododendron micranthum	0.388889	0.666667	0.6	0.727273	0.614286	0.317647	0.376471	0	0.181818	0
Ericaceae	Rhododendron	Rhododendron molle	0	0	0.0181818	0	0	0	0.0823529	0.123077	0.545455	0.1375
Ericaceae	Rhododendron	Rhododendron mucronatum	0	0.333333	0.0181818	0	0.0857143	0	0.0117647	0	0.109091	0
Ericaceae	Rhododendron	Rhododendron mucronulatum	0.333333	0.666667	0.4	0.0363636	0.771429	0.294118	0.0235294	0	0	0
Ericaceae	Rhododendron	Rhododendron obtusum	0	0	0	0	0	0.117647	0	0	0.0909091	0
Ericaceae	Rhododendron	Rhododendron simsii	0	0.333333	0.0181818	0	0.0142857	0.0588235	0.223529	0.230769	0.854545	0.1875
Ericaceae	Rhododendron	Rhododendron mariesii	0	0	0	0	0	0	0.164706	0.276923	1	0.2
Ericaceae	Vaccinium	Vaccinium carlesii	0	0	0	0	0	0	0	0.0769231	0.709091	0.0125
Ericaceae	Vaccinium	Vaccinium henryi	0	0	0	0	0	0	0	0	0.0363636	0.0625
Eriocaulaceae	Eriocaulon	Eriocaulon buergerianum	0	0	0.0181818	0	0.0714286	0	0.0588235	0.169231	0.454545	0.0625
Eriocaulaceae	Eriocaulon	Eriocaulon cinereum	0	0	0	0	0.0714286	0	0	0	0.0545455	0.0125
Eriocaulaceae	Eriocaulon	Eriocaulon decemflorum	0	0	0	0	0.157143	0.0125	0	0	0.218182	0
Eriocaulaceae	Eriocaulon	Eriocaulon faberi	0	0	0	0	0	0	0	0.0769231	0.109091	0
Euphorbiaceae	Acalypha	Acalypha supera	0.166667	0.333333	0	0.0181818	0	0	0.0705882	0.169231	0.145455	0.0875
Euphorbiaceae	Alchornea	Alchornea davidii	0	0	0	0	0	0.0705882	0.152941	0.307692	0.218182	0.0125
Euphorbiaceae	Discocleidion	Discocleidion rufescens	0.0555556	0	0	0.0909091	0	0	0.0352941	0	0	0.0125
Euphorbiaceae	Euphorbia	Euphorbia bifida	0	0.333333	0	0	0	0	0	0.0769231	0.181818	0
Euphorbiaceae	Euphorbia	Euphorbia cyathophora	0.0555556	0	0	0.109091	0	0.0705882	0	0.0769231	0	0
Euphorbiaceae	Euphorbia	Euphorbia helioscopia	0	0.333333	0	0.0545455	0.0714286	0.458824	0.411765	0.676923	0.218182	0.275
Euphorbiaceae	Euphorbia	Euphorbia heterophylla	0	0.333333	0	0	0	0.0588235	0	0.0769231	0.127273	0
Euphorbiaceae	Euphorbia	Euphorbia hylonoma	0	0	0	0	0	0	0.0823529	0.0769231	0.0545455	0.025
Euphorbiaceae	Euphorbia	Euphorbia hypericifolia	0.333333	0	0.0181818	0.0909091	0.0714286	0.129412	0.0705882	0	0.581818	0.775
Euphorbiaceae	Euphorbia	Euphorbia kansuensis	0	0.333333	0.0181818	0.218182	0	0	0.0588235	0.0923077	0.0363636	0
Euphorbiaceae	Euphorbia	Euphorbia kansui	0.0555556	0.333333	0	0.0909091	0	0	0.0352941	0.0769231	0	0
Euphorbiaceae	Euphorbia	Euphorbia makinoi	0.0555556	0	0	0	0	0.0588235	0.0588235	0.169231	0.0909091	0
Euphorbiaceae	Euphorbia	Euphorbia marginata	0.111111	0.333333	0.0363636	0.0909091	0.157143	0.305882	0.0588235	0.153846	0.0909091	0
Euphorbiaceae	Euphorbia	Euphorbia micractina	0.0555556	0	0.0181818	0.0909091	0	0	0	0	0	0
Euphorbiaceae	Euphorbia	Euphorbia milii	0.0555556	0.333333	0	0.0909091	0	0	0	0.0769231	0.0909091	0
Euphorbiaceae	Euphorbia	Euphorbia pulcherrima	0.0555556	0	0	0.0909091	0	0.176471	0	0.153846	0.0909091	0
Euphorbiaceae	Euphorbia	Euphorbia thymifolia	0	0	0	0	0.0714286	0.0117647	0.0588235	0.415385	0.254545	0
Euphorbiaceae	Euphorbia	Euphorbia maculata	0.277778	0	0.0363636	0.0181818	0.371429	0.494118	0.188235	0.969231	0.909091	0.875
Euphorbiaceae	Mallotus	Mallotus japonicus	0	0	0	0	0.0142857	0	0	0.184615	0.509091	0.1625
Euphorbiaceae	Mallotus	Mallotus philippensis	0	0	0	0	0	0	0	0	0.145455	0.15
Euphorbiaceae	Mallotus	Mallotus repandus	0	0	0	0	0	0	0	0.246154	0.8	0.225
Euphorbiaceae	Mercurialis	Mercurialis leiocarpa	0	0	0	0	0	0	0	0	0.145455	0.025
Euphorbiaceae	Speranskia	Speranskia cantonensis	0	0	0	0	0	0	0.0117647	0	0	0.0125
Euphorbiaceae	Speranskia	Speranskia tuberculata	0.277778	0.333333	0.290909	0.545455	0.0857143	0.6	0.294118	0.184615	0	0.025
Euphorbiaceae	Triadica	Triadica cochinchinensis	0	0	0.0181818	0.0181818	0	0	0	0	0.418182	0.0875
Euphorbiaceae	Triadica	Triadica japonica	0	0	0	0	0.0142857	0.0588235	0.117647	0.169231	0.4	0.2
Euphorbiaceae	Triadica	Triadica sebifera	0.0555556	0	0	0	0.0142857	0.4	0.458824	0.784615	0.963636	0.55
Euphorbiaceae	Vernicia	Vernicia fordii	0	0	0	0	0.0142857	0.0588235	0.211765	0.292308	0.763636	0.0625
Eupteleaceae	Euptelea	Euptelea pleiosperma	0.0555556	0	0.0363636	0.0363636	0	0	0.117647	0	0.0363636	0.0375
Fagaceae	Castanea	Castanea henryi	0	0	0.0363636	0	0	0	0.0117647	0.276923	0.709091	0.1875
Fagaceae	Castanea	Castanea seguinii	0	0	0	0.0181818	0.0142857	0	0.258824	0.384615	0.672727	0.3125
Fagaceae	Castanopsis	Castanopsis carlesii	0	0	0	0	0	0	0	0.0153846	0.327273	0.0125
Fagaceae	Castanopsis	Castanopsis eyrei	0	0	0	0	0	0	0	0.2	0.490909	0.2
Fagaceae	Castanopsis	Castanopsis fabri	0	0	0	0	0	0	0	0.0153846	0.272727	0.075
Fagaceae	Castanopsis	Castanopsis fargesii	0	0	0	0	0	0	0	0	0.527273	0.075
Fagaceae	Castanopsis	Castanopsis jucunda	0	0	0	0	0	0.0117647	0	0	0.163636	0.075
Fagaceae	Castanopsis	Castanopsis sclerophylla	0	0	0	0	0	0	0	0.338462	0.945455	0.2625
Fagaceae	Castanopsis	Castanopsis tibetana	0	0	0	0	0	0.0117647	0	0.0153846	0.309091	0.0875
Fagaceae	Cyclobalanopsis	Cyclobalanopsis glauca	0	0	0	0	0	0	0.176471	0.246154	1	0.35
Fagaceae	Cyclobalanopsis	Cyclobalanopsis myrsinifolia	0	0	0	0	0	0	0.0588235	0.0769231	0.254545	0
Fagaceae	Cyclobalanopsis	Cyclobalanopsis shennongii	0	0	0	0	0	0	0.117647	0.0153846	0.509091	0.175
Fagaceae	Cyclobalanopsis	Cyclobalanopsis stewardiana	0	0	0	0	0	0	0	0.0769231	0.490909	0.125
Fagaceae	Fagus	Fagus engleriana	0.0555556	0	0	0	0	0	0.0705882	0	0.145455	0.1
Fagaceae	Lithocarpus	Lithocarpus brevicaudatus	0	0	0	0	0	0	0	0	0.654545	0.0625
Fagaceae	Lithocarpus	Lithocarpus cleistocarpus	0	0	0	0	0	0	0	0.0769231	0.181818	0.025
Fagaceae	Lithocarpus	Lithocarpus glaber	0	0	0	0	0	0.0117647	0.0235294	0.276923	0.890909	0.1625
Fagaceae	Lithocarpus	Lithocarpus henryi	0	0	0	0	0	0	0	0.0769231	0.345455	0.1
Fagaceae	Quercus	Quercus acutissima	0.111111	0.333333	0.109091	0	0.428571	0.423529	0.223529	0.446154	0.490909	0.2125
Fagaceae	Quercus	Quercus chenii	0	0	0	0	0	0	0	0.107692	0.163636	0.175
Fagaceae	Quercus	Quercus engleriana	0	0	0	0	0	0	0.0117647	0	0.0727273	0
Fagaceae	Quercus	Quercus fabri	0	0	0	0	0	0	0.2	0.6	1	0.4125
Fagaceae	Quercus	Quercus oxyphylla	0	0	0	0	0	0	0	0.0153846	0.0181818	0.0125
Fagaceae	Quercus	Quercus serrata	0	0.333333	0.0181818	0.0363636	0.0142857	0.117647	0.141176	0.107692	0.345455	0.1
Fagaceae	Quercus	Quercus phillyreoides	0	0	0	0	0	0	0.0117647	0.0153846	0.381818	0
Fagaceae	Quercus	Quercus baronii	0	0	0	0.363636	0	0.0588235	0.376471	0	0	0
Fagaceae	Quercus	Quercus dolicholepis	0	0	0.0181818	0.0181818	0	0	0	0	0	0
Fagaceae	Quercus	Quercus mongolica	0.388889	0.666667	0.381818	0.272727	0.571429	0.364706	0.0117647	0.0769231	0	0
Flacourtiaceae	Idesia	Idesia polycarpa	0.0555556	0	0	0	0	0	0.152941	0	0.418182	0.1625
Flacourtiaceae	Poliothyrsis	Poliothyrsis sinensis	0	0	0	0	0	0.0588235	0.105882	0.0307692	0.290909	0
Gentianaceae	Centaurium	Centaurium pulchellum	0	0	0.0181818	0	0	0	0.0588235	0	0	0
Gentianaceae	Comastoma	Comastoma falcatum	0.0555556	0	0.0181818	0.127273	0	0	0	0	0	0
Gentianaceae	Gentiana	Gentiana dahurica	0.166667	0.333333	0.236364	0.6	0	0.0117647	0	0	0	0
Gentianaceae	Gentiana	Gentiana macrophylla	0.166667	0.333333	0.345455	0.454545	0.0857143	0	0.0117647	0	0	0
Gentianaceae	Gentiana	Gentiana manshurica	0	0	0	0	0.0142857	0.0352941	0.0588235	0.123077	0.0545455	0.0875
Gentianaceae	Gentiana	Gentiana pseudoaquatica	0.0555556	0	0.127273	0.145455	0	0	0.0117647	0	0	0
Gentianaceae	Gentiana	Gentiana scabra	0	0	0	0	0.342857	0	0.0352941	0.107692	0.563636	0.0375
Gentianaceae	Gentiana	Gentiana squarrosa	0.388889	0.333333	0.309091	0.527273	0.385714	0	0.0352941	0	0.0181818	0.0125
Gentianaceae	Gentiana	Gentiana yokusai	0	0	0.0181818	0.0545455	0.0142857	0.0588235	0.0117647	0.0153846	0.218182	0
Gentianaceae	Gentianella	Gentianella acuta	0	0	0.0363636	0.0363636	0	0	0	0	0	0
Gentianaceae	Gentianopsis	Gentianopsis barbata	0.166667	0.333333	0.381818	0.418182	0.0142857	0	0.0941176	0	0	0
Gentianaceae	Gentianopsis	Gentianopsis paludosa	0	0	0.0363636	0.0181818	0	0	0	0	0	0
Gentianaceae	Halenia	Halenia corniculata	0.166667	0.333333	0.254545	0.472727	0	0	0.0235294	0	0.0545455	0
Gentianaceae	Lomatogonium	Lomatogonium carinthiacum	0.0555556	0.333333	0.0909091	0.0545455	0	0	0	0	0	0
Gentianaceae	Lomatogonium	Lomatogonium rotatum	0.0555556	0.333333	0.0727273	0.109091	0	0	0	0	0	0
Gentianaceae	Nymphoides	Nymphoides indica	0	0	0	0	0.0714286	0.0705882	0	0.0153846	0	0.0125
Gentianaceae	Pterygocalyx	Pterygocalyx volubilis	0.0555556	0.333333	0.127273	0.0727273	0.171429	0	0.0235294	0	0	0
Gentianaceae	Swertia	Swertia bimaculata	0.0555556	0	0.0181818	0.290909	0.0714286	0	0.0470588	0	0.218182	0.1875
Gentianaceae	Swertia	Swertia dichotoma	0	0.333333	0.0363636	0.236364	0	0	0	0	0	0
Gentianaceae	Swertia	Swertia diluta	0.444444	0.666667	0.363636	0.418182	0.4	0.188235	0.152941	0.107692	0.0909091	0
Gentianaceae	Swertia	Swertia erythrosticta	0.111111	0.333333	0.0727273	0.109091	0	0	0	0	0	0
Gentianaceae	Swertia	Swertia hickinii	0	0	0	0	0	0	0	0.107692	0.690909	0.0375
Gentianaceae	Swertia	Swertia pseudochinensis	0.111111	0.333333	0.309091	0.0363636	0.614286	0.188235	0	0	0	0
Gentianaceae	Tripterospermum	Tripterospermum chinense	0	0	0	0	0	0	0.0117647	0	0.672727	0.1625
Gentianaceae	Tripterospermum	Tripterospermum filicaule	0	0	0	0	0	0	0	0	0.0727273	0.1375
Geraniaceae	Erodium	Erodium cicutarium	0.0555556	0.333333	0.0909091	0	0	0.117647	0	0.0923077	0	0
Geraniaceae	Geranium	Geranium carolinianum	0.0555556	0	0	0	0	1	0.0588235	0.307692	0.909091	0.8875
Geraniaceae	Pelargonium	Pelargonium domesticum	0.0555556	0.333333	0	0	0	0	0	0	0.0909091	0
Geraniaceae	Erodium	Erodium stephanianum	0.555556	0.666667	0.818182	0.945455	0.542857	0.517647	0.341176	0.0769231	0	0
Geraniaceae	Geranium	Geranium dahuricum	0.166667	0.333333	0.309091	0.454545	0.171429	0	0.0235294	0	0	0
Geraniaceae	Geranium	Geranium platyanthum	0.166667	0.333333	0.290909	0.309091	0	0	0.0352941	0	0	0
Geraniaceae	Geranium	Geranium sibiricum	0.333333	0.666667	0.472727	0.745455	0.8	0.376471	0.141176	0.153846	0	0
Geraniaceae	Geranium	Geranium wlassowianum	0.166667	0.333333	0.127273	0.0727273	0	0.164706	0.0117647	0	0	0
Gesneriaceae	Boea	Boea hygrometricum	0.5	0.666667	0.418182	0.327273	0.0142857	0.188235	0.270588	0	0.345455	0.2125
Gesneriaceae	Boea	Boea clarkeana	0	0	0	0	0	0	0	0	0.145455	0.0125
Gesneriaceae	Briggsia	Briggsia chienii	0	0	0	0	0	0	0	0	0.309091	0.175
Gesneriaceae	Conandron	Conandron ramondioides	0	0	0	0	0	0	0	0	0.0909091	0.0875
Gesneriaceae	Didymocarpus	Didymocarpus heucherifolius	0	0	0	0	0	0	0	0	0.0545455	0.0875
Grossulariaceae	Ribes	Ribes burejense	0.166667	0.666667	0.236364	0.363636	0.214286	0	0.0588235	0	0	0
Grossulariaceae	Ribes	Ribes fasciculatum	0	0	0	0.0363636	0	0.0588235	0	0.2	0.2	0.0875
Grossulariaceae	Ribes	Ribes himalense	0	0	0.127273	0.109091	0	0	0.0117647	0	0	0
Grossulariaceae	Ribes	Ribes komarovii	0	0.333333	0.0727273	0.254545	0.1	0	0.0117647	0	0	0
Grossulariaceae	Ribes	Ribes mandshuricum	0.277778	0.333333	0.345455	0.218182	0.257143	0	0.0588235	0	0	0
Grossulariaceae	Ribes	Ribes pulchellum	0.111111	0.333333	0.109091	0.181818	0.0142857	0.0588235	0	0	0	0
Guttiferae	Hypericum	Hypericum elatoides	0	0	0	0.0909091	0	0	0.0117647	0	0	0
Guttiferae	Hypericum	Hypericum longistylum	0	0	0	0	0.2	0	0.0352941	0	0	0.0125
Guttiferae	Hypericum	Hypericum perforatum	0	0	0	0.0545455	0	0.0117647	0.0823529	0	0.127273	0
Guttiferae	Hypericum	Hypericum erectum	0	0	0	0.0181818	0	0	0.117647	0	0.654545	0.0875
Guttiferae	Hypericum	Hypericum faberi	0	0	0	0	0	0	0	0.0769231	0.0181818	0.0625
Guttiferae	Hypericum	Hypericum japonicum	0	0	0	0	0	0.0588235	0.0823529	0.307692	0.818182	0.2625
Guttiferae	Hypericum	Hypericum monogynum	0.111111	0	0	0.0181818	0.171429	0.458824	0.129412	0.169231	0.327273	0.1
Guttiferae	Hypericum	Hypericum patulum	0	0	0	0	0	0.0117647	0.0588235	0.0923077	0.327273	0.0875
Guttiferae	Hypericum	Hypericum sampsonii	0	0	0	0	0	0	0.152941	0.0923077	0.545455	0.2125
Guttiferae	Hypericum	Hypericum seniawinii	0	0	0	0	0	0	0	0.0153846	0.0363636	0.075
Haloragidaceae	Haloragis	Haloragis micranthus	0	0	0	0	0	0	0	0.2	0.490909	0.1
Haloragidaceae	Myriophyllum	Myriophyllum verticillatum	0.166667	0.4	0.0545455	0.0181818	0.114286	0.117647	0	0.123077	0.290909	0
Hamamelidaceae	Hamamelis	Hamamelis mollis	0	0	0	0	0	0	0.0117647	0	0.145455	0.25
Hamamelidaceae	Corylopsis	Corylopsis glandulifera	0	0	0	0	0.0142857	0	0	0	0.363636	0.1
Hamamelidaceae	Corylopsis	Corylopsis sinensis	0	0	0	0	0.0142857	0	0	0.0769231	0.381818	0.2125
Hamamelidaceae	Distylium	Distylium myricoides	0	0	0	0	0	0	0	0.0769231	0.345455	0.1875
Hamamelidaceae	Fortunearia	Fortunearia sinensis	0	0	0	0	0	0.0588235	0.223529	0.353846	0.163636	0.425
Hamamelidaceae	Liquidambar	Liquidambar acalycina	0	0	0	0	0	0	0	0.0769231	0.2	0.0625
Hamamelidaceae	Liquidambar	Liquidambar formosana	0	0	0	0	0	0.435294	0.0941176	0.369231	0.909091	0.375
Hamamelidaceae	Loropetalum	Loropetalum chinense	0	0	0	0	0	0.0588235	0.0235294	0.338462	1	0.425
Hamamelidaceae	Sycopsis	Sycopsis sinensis	0	0	0	0	0	0	0	0.0769231	0.163636	0.0125
Hamamelidaceae	Sinowilsonia	Sinowilsonia henryi	0.0555556	0	0	0.0363636	0	0.0588235	0.141176	0	0	0
Hippuridaceae	Hippuris	Hippuris vulgaris	0.0555556	0	0.145455	0.0181818	0.0857143	0	0	0	0	0
Hydrangeaceae	Cardiandra	Cardiandra moellendorffii	0	0	0	0	0	0	0.0823529	0	0.345455	0.15
Hydrangeaceae	Deutzia	Deutzia crenata	0	0	0	0	0	0.305882	0.0705882	0.153846	0.127273	0.025
Hydrangeaceae	Deutzia	Deutzia glauca	0	0	0	0	0	0	0.0823529	0.0769231	0.272727	0.225
Hydrangeaceae	Deutzia	Deutzia grandiflora	0.444444	0.733333	0.418182	0.618182	0.371429	0.870588	0.152941	0.0769231	0	0
Hydrangeaceae	Deutzia	Deutzia ningpoensis	0.0555556	0	0	0	0	0	0	0	0.709091	0.2375
Hydrangeaceae	Deutzia	Deutzia parviflora	0.388889	0.666667	0.490909	0.472727	0.228571	0.188235	0.270588	0.0769231	0.0909091	0
Hydrangeaceae	Deutzia	Deutzia schneideriana	0.0555556	0	0	0	0	0	0	0.0769231	0.0181818	0.0875
Hydrangeaceae	Dichroa	Dichroa febrifuga	0.0555556	0	0	0	0	0.0117647	0.0352941	0	0.127273	0.025
Hydrangeaceae	Hydrangea	Hydrangea anomala	0	0	0	0	0	0	0.0235294	0.0769231	0.745455	0.0875
Hydrangeaceae	Hydrangea	Hydrangea bretschneideri	0.388889	0.666667	0.436364	0.818182	0.157143	0	0.129412	0	0.109091	0
Hydrangeaceae	Hydrangea	Hydrangea chinensis	0	0	0	0	0	0	0.0117647	0	0.636364	0.125
Hydrangeaceae	Hydrangea	Hydrangea paniculata	0	0	0	0	0.0714286	0.2	0	0.0923077	0.745455	0.2125
Hydrangeaceae	Hydrangea	Hydrangea zhewanensis	0	0	0	0	0	0	0	0	0.345455	0.0625
Hydrangeaceae	Kirengeshoma	Kirengeshoma palmata	0	0	0	0	0	0	0	0	0.0181818	0.0875
Hydrangeaceae	Philadelphus	Philadelphus brachybotrys	0.0555556	0	0	0	0.0142857	0.0588235	0	0.153846	0.218182	0.0125
Hydrangeaceae	Philadelphus	Philadelphus dasycalyx	0	0	0	0.654545	0	0	0.0352941	0	0	0.0125
Hydrangeaceae	Philadelphus	Philadelphus laxiflorus	0	0	0.0181818	0.0363636	0	0	0.0705882	0	0.0181818	0.075
Hydrangeaceae	Philadelphus	Philadelphus sericanthus	0.0555556	0	0.0181818	0.2	0.0142857	0	0.0823529	0.0923077	0.345455	0.15
Hydrangeaceae	Philadelphus	Philadelphus zhejiangensis	0	0	0	0	0	0	0	0.0769231	0.509091	0.0875
Hydrangeaceae	Pileostegia	Pileostegia viburnoides	0	0	0	0	0	0	0	0.0769231	0.618182	0.1875
Hydrangeaceae	Schizophragma	Schizophragma corylifolium	0	0	0	0	0	0	0.0117647	0.0769231	0.145455	0
Hydrangeaceae	Schizophragma	Schizophragma integrifolium	0	0	0	0	0	0	0.141176	0.0923077	0.290909	0.2
Hydrocharitaceae	Ottelia	Ottelia alismoides	0	0	0	0	0.0714286	0	0.0235294	0.0923077	0.418182	0.0125
Hypoxidaceae	Hypoxis	Hypoxis aurea	0	0.333333	0	0	0	0	0	0	0.127273	0
Iridaceae	Iris	Iris dichotoma	0.388889	0.666667	0.563636	0.490909	0.3	0.258824	0.0823529	0.261538	0	0.0125
Iridaceae	Iris	Iris japonica	0	0	0	0	0	0.0588235	0.0588235	0.0307692	0.454545	0
Iridaceae	Iris	Iris proantha	0	0	0	0	0	0	0	0.0769231	0.109091	0
Iridaceae	Iris	Iris ruthenica	0.388889	0.333333	0.145455	0.145455	0.342857	0.117647	0.0588235	0	0	0
Iridaceae	Iris	Iris speculatrix	0	0	0	0	0	0	0	0	0.418182	0.0875
Iridaceae	Iris	Iris tectorum	0.0555556	0	0	0.0363636	0.0857143	0.188235	0.117647	0.153846	0.127273	0
Iridaceae	Iris	Iris tenuifolia	0	0.333333	0.0363636	0.2	0.0857143	0	0	0	0	0
Juglandaceae	Carya	Carya cathayensis	0	0	0	0	0	0	0.0705882	0.0769231	0.345455	0.05
Juglandaceae	Cyclocarya	Cyclocarya paliurus	0.0555556	0	0	0	0	0	0.117647	0.0769231	0.509091	0.2875
Juglandaceae	Juglans	Juglans mandshurica	0.444444	0.666667	0.436364	0.436364	0.614286	0.117647	0.0117647	0	0.4	0
Juglandaceae	Platycarya	Platycarya strobilacea	0.0555556	0	0	0	0	0.188235	0.305882	0.661538	1	0.5125
Juncaceae	Juncus	Juncus prismatocarpus	0	0	0.0181818	0.0363636	0.0285714	0	0.0705882	0.0923077	0.272727	0
Juncaceae	Juncus	Juncus alatus	0	0	0	0	0	0.117647	0.176471	0.153846	0.472727	0.2125
Juncaceae	Juncus	Juncus bufonius	0.222222	0.333333	0.2	0.454545	0.271429	0.164706	0.0705882	0.153846	0	0
Juncaceae	Juncus	Juncus diastrophanthus	0	0	0	0	0	0.0823529	0.0117647	0.0769231	0.345455	0.0375
Juncaceae	Juncus	Juncus effusus	0.111111	0.333333	0.0727273	0	0.471429	0.423529	0.4	0.292308	0.581818	0.175
Juncaceae	Juncus	Juncus papillosus	0	0	0	0	0.257143	0.117647	0.0117647	0	0	0
Juncaceae	Juncus	Juncus setchuensis	0	0	0	0.0909091	0.0142857	0.0588235	0.176471	0.338462	0.563636	0.3375
Juncaceae	Juncus	Juncus taonanensis	0	0	0	0	0	0.0823529	0	0.0923077	0	0
Juncaceae	Juncus	Juncus tenuis	0	0	0	0	0	0.0588235	0.0117647	0.0769231	0.218182	0
Juncaceae	Luzula	Luzula multiflora	0	0.333333	0.0181818	0	0.0714286	0	0	0.153846	0.236364	0
Juncaceae	Luzula	Luzula plumosa	0	0.333333	0.0181818	0.0181818	0	0	0.0117647	0	0.145455	0
Juncaceae	Juncus	Juncus articulatus	0.0555556	0.333333	0.236364	0.290909	0	0.188235	0.223529	0.0769231	0.109091	0
Juncaceae	Juncus	Juncus castaneus	0	0	0.0181818	0.0363636	0	0	0	0	0	0
Juncaceae	Juncus	Juncus triglumis	0	0.333333	0.0363636	0.0363636	0	0	0	0	0	0
Juncaginaceae	Triglochin	Triglochin maritima	0	0.333333	0.0727273	0.0363636	0.171429	0.176471	0	0	0	0
Juncaginaceae	Triglochin	Triglochin palustris	0.222222	0.333333	0.254545	0.4	0.142857	0	0.0705882	0	0	0
Labiatae	Ajuga	Ajuga nipponensis	0	0	0	0	0	0.0588235	0.0588235	0.384615	0.2	0.1
Labiatae	Clinopodium	Clinopodium chinense	0.333333	0	0.218182	0.109091	0.371429	0.0117647	0.4	0.215385	0.781818	0.2625
Labiatae	Clinopodium	Clinopodium confine	0	0	0	0.0181818	0	0	0.0705882	0.2	0.236364	0.3125
Labiatae	Clinopodium	Clinopodium gracile	0	0	0	0	0	0	0.0588235	0.261538	0.618182	0.2875
Labiatae	Clinopodium	Clinopodium polycephalum	0	0	0.0181818	0.0545455	0	0.0117647	0.223529	0.430769	0.236364	0.2
Labiatae	Clinopodium	Clinopodium repens	0	0	0	0.0181818	0	0	0.0352941	0.2	0.109091	0
Labiatae	Dysophylla	Dysophylla stellatus	0	0	0	0	0	0	0	0.0769231	0.0545455	0.0125
Labiatae	Dysophylla	Dysophylla yatabeanus	0	0	0	0	0	0	0.0117647	0.0153846	0.254545	0.1
Labiatae	Elsholtzia	Elsholtzia argyi	0	0	0.0181818	0	0	0.0117647	0	0.169231	0.436364	0.0875
Labiatae	Elsholtzia	Elsholtzia stachyodes	0	0.333333	0.0181818	0	0	0	0	0	0.0181818	0.075
Labiatae	Elsholtzia	Elsholtzia splendens	0.0555556	0	0.0363636	0	0.0857143	0.282353	0.0705882	0.276923	0.363636	0.1125
Labiatae	Glechoma	Glechoma longituba	0.166667	0	0.109091	0.0909091	0.442857	0.141176	0.152941	0.446154	0.381818	0.2125
Labiatae	Glechoma	Glechoma biondiana	0	0	0.0181818	0	0	0	0.0117647	0	0	0.0125
Labiatae	Keiskea	Keiskea elsholtzioides	0	0	0	0	0	0	0	0.169231	0.290909	0.0875
Labiatae	Keiskea	Keiskea sinensis	0	0	0	0	0	0	0.0117647	0.0307692	0.218182	0.0875
Labiatae	Lamium	Lamium amplexicaule	0.0555556	0	0	0	0	0.364706	0.141176	0.384615	0.272727	0.075
Labiatae	Lamium	Lamium barbatum	0	0	0.0181818	0.345455	0.414286	0	0.188235	0.353846	0.509091	0.2
Labiatae	Lycopus	Lycopus lucidus	0	0.333333	0.0181818	0.0181818	0.357143	0.0235294	0.0117647	0.492308	0.345455	0.125
Labiatae	Mentha	Mentha spicata	0.0555556	0	0	0	0	0	0	0.0923077	0.0909091	0
Labiatae	Mosla	Mosla chinensis	0.0555556	0	0	0	0	0.0588235	0.0588235	0.338462	0.581818	0.4125
Labiatae	Mosla	Mosla dianthera	0.0555556	0	0.0181818	0	0.257143	0.294118	0.0588235	0.338462	0.727273	0.3125
Labiatae	Mosla	Mosla grosseserrata	0.0555556	0	0	0	0.0142857	0	0	0.0769231	0.218182	0
Labiatae	Mosla	Mosla scabra	0.0555556	0	0.0181818	0	0.128571	0.0588235	0.117647	0.384615	0.690909	0.4
Labiatae	Mosla	Mosla soochouensis	0.0555556	0	0	0	0	0	0	0.307692	0.363636	0.025
Labiatae	Nepeta	Nepeta everardi	0	0	0	0	0	0	0	0	0.0181818	0.075
Labiatae	Ocimum	Ocimum basilicum	0.111111	0	0	0.0181818	0	0	0.0588235	0.0923077	0.109091	0.0125
Labiatae	Origanum	Origanum vulgare	0.0555556	0	0	0	0	0	0.282353	0.138462	0.509091	0.4
Labiatae	Paraphlomis	Paraphlomis intermedia	0	0	0	0	0	0	0	0	0.0181818	0.075
Labiatae	Prunella	Prunella asiatica	0	0.333333	0	0	0.4	0.0117647	0.0235294	0.430769	0.181818	0.0625
Labiatae	Salvia	Salvia chinensis	0	0.333333	0.0181818	0	0	0.0588235	0.105882	0.523077	0.672727	0.775
Labiatae	Salvia	Salvia liguliloba	0	0	0	0	0	0	0	0.0769231	0.127273	0.0875
Labiatae	Salvia	Salvia prionitis	0	0	0	0	0	0	0	0.0769231	0.163636	0.0875
Labiatae	Salvia	Salvia sinica	0	0	0	0	0	0	0	0.0769231	0.127273	0.2375
Labiatae	Scutellaria	Scutellaria barbata	0	0	0.0181818	0	0	0.164706	0.0823529	0.723077	0.509091	0.1375
Labiatae	Scutellaria	Scutellaria laeteviolacea	0	0	0	0	0	0	0	0.169231	0.0181818	0.0875
Labiatae	Scutellaria	Scutellaria macrodonta	0.0555556	0.333333	0.0545455	0	0	0	0.0117647	0	0	0
Labiatae	Scutellaria	Scutellaria strigillosa	0	0.333333	0.0909091	0	0.114286	0.129412	0	0.0769231	0	0
Labiatae	Scutellaria	Scutellaria tuberifera	0	0	0	0	0	0	0	0.169231	0.290909	0.025
Labiatae	Scutellaria	Scutellaria indica	0	0	0	0	0	0.0823529	0	0.0769231	0.0909091	0.0625
Labiatae	Scutellaria	Scutellaria indica var. subacaulis	0	0	0	0	0	0	0.0588235	0.0153846	0	0
Labiatae	Scutellaria	Scutellaria pekinensis	0.0555556	0.333333	0.0909091	0	0	0.0588235	0.0588235	0	0	0
Labiatae	Scutellaria	Scutellaria pekinensis var. purpureicaulis	0	0	0	0	0	0	0	0.153846	0.0181818	0.0125
Labiatae	Stachys	Stachys arrecta	0	0	0	0.0181818	0	0	0.0117647	0	0.145455	0.1375
Labiatae	Teucrium	Teucrium pernyi	0	0	0	0	0	0	0.0705882	0.123077	0.454545	0.175
Labiatae	Teucrium	Teucrium japonicum	0.0555556	0	0	0	0	0	0.0117647	0	0	0
Labiatae	Teucrium	Teucrium viscidum	0	0	0	0	0	0	0.0235294	0	0.109091	0.0625
Labiatae	Ajuga	Ajuga linearifolia	0	0.333333	0	0.0545455	0.0714286	0.270588	0	0.246154	0	0
Labiatae	Amethystea	Amethystea caerulea	0.388889	0.333333	0.327273	0.363636	0.457143	0.0941176	0.152941	0.0153846	0	0.0375
Labiatae	Dracocephalum	Dracocephalum moldavica	0.333333	0.333333	0.4	0.945455	0.157143	0	0.0117647	0	0	0
Labiatae	Dracocephalum	Dracocephalum rupestre	0.333333	0.333333	0.381818	0.527273	0.114286	0	0	0	0.0909091	0
Labiatae	Elsholtzia	Elsholtzia densa	0.166667	0.333333	0.236364	0.4	0.0714286	0	0	0.0769231	0	0
Labiatae	Elsholtzia	Elsholtzia stauntonii	0.444444	0.333333	0.363636	0.381818	0.157143	0	0.152941	0	0	0
Labiatae	Lycopus	Lycopus lucidus	0	0	0.0181818	0	0	1	0	0	0	0
Labiatae	Nepeta	Nepeta cataria	0.0555556	0	0.0181818	0.145455	0	0.341176	0.164706	0	0	0.0125
Labiatae	Nepeta	Nepeta prattii	0	0.333333	0.0727273	0.181818	0	0	0.0117647	0	0.0909091	0
Labiatae	Salvia	Salvia umbratica	0.333333	0.333333	0.163636	0.4	0	0	0.129412	0	0	0
Labiatae	Salvia	Salvia miltiorrhiza	0.0555556	0.333333	0	0.0727273	0	0	0.0352941	0.0153846	0	0
Labiatae	Scutellaria	Scutellaria baicalensis	0.444444	0.666667	0.690909	1	0.371429	0.482353	0.352941	0.0769231	0	0.0125
Labiatae	Scutellaria	Scutellaria scordiifolia	0	0	0.0545455	0.0545455	0	0	0.0117647	0	0	0
Labiatae	Scutellaria	Scutellaria scordiifolia var. puberula	0	0.333333	0.127273	0.345455	0	0	0	0	0	0
Labiatae	Scutellaria	Scutellaria scordiifolia var. villosissima	0	0	0.0181818	0.145455	0	0	0.129412	0	0	0
Labiatae	Scutellaria	Scutellaria scordiifolia var. wulingshanensis	0	0.333333	0.0363636	0.0363636	0.0142857	0	0	0	0	0
Labiatae	Scutellaria	Scutellaria viscidula	0	0.333333	0.181818	0.2	0	0	0	0	0	0
Labiatae	Stachys	Stachys chinensis	0.444444	0.666667	0.236364	0.254545	0.3	0.0705882	0.0941176	0	0.109091	0
Labiatae	Teucrium	Teucrium ussuriense	0.111111	0	0.0181818	0.0181818	0.0714286	0.117647	0	0	0	0
Labiatae	Thymus	Thymus mongolicus	0.166667	0.333333	0.163636	0.872727	0.171429	1	0.0941176	0.0769231	0	0
Labiatae	Thymus	Thymus quinquecostatus	0.333333	0.333333	0.327273	0.563636	0	0.0588235	0.0117647	0.0769231	0	0
Lamiaceae	Callicarpa	Callicarpa bodinieri	0	0	0	0	0	0.176471	0.129412	0.0923077	0.363636	0.325
Lamiaceae	Callicarpa	Callicarpa cathayana	0	0	0	0.0545455	0.0285714	0	0.0941176	0.276923	0.818182	0.375
Lamiaceae	Callicarpa	Callicarpa dichotoma	0.166667	0	0.0363636	0	0.0142857	0.529412	0.247059	0.4	0.454545	0.2
Lamiaceae	Callicarpa	Callicarpa giraldii	0.0555556	0	0	0	0.0142857	0.117647	0.270588	0.184615	0.654545	0.2
Lamiaceae	Callicarpa	Callicarpa japonica	0.0555556	0	0.0181818	0.0909091	0.0714286	0.364706	0.0588235	0.0769231	0.581818	0.15
Lamiaceae	Callicarpa	Callicarpa lingii	0	0	0	0	0	0	0	0	0.0727273	0.0125
Lamiaceae	Callicarpa	Callicarpa rubella	0	0	0	0	0	0.0117647	0	0	0.436364	0.1375
Lamiaceae	Caryopteris	Caryopteris incana	0.111111	0	0.0181818	0	0	0	0.164706	0.123077	0.581818	0.25
Lamiaceae	Caryopteris	Caryopteris mongholica	0	0	0.0909091	0.0909091	0	0.117647	0	0	0	0
Lamiaceae	Caryopteris	Caryopteris nepetifolia	0	0	0.0181818	0.181818	0	0	0.317647	0	0	0
Lamiaceae	Caryopteris	Caryopteris tangutica	0.0555556	0	0	0.0363636	0	0	0.0235294	0	0.109091	0
Lamiaceae	Caryopteris	Caryopteris terniflora	0.111111	0.333333	0.163636	0.2	0	0	0.352941	0.153846	0	0.0625
Lamiaceae	Clerodendrum	Clerodendrum bungei	0	0	0.0181818	0.0909091	0	0.305882	0.2	0.0923077	0.454545	0.3375
Lamiaceae	Clerodendrum	Clerodendrum cyrtophyllum	0	0	0	0	0	0	0.117647	0.107692	0.745455	0.4625
Lamiaceae	Clerodendrum	Clerodendrum kaichianum	0	0	0	0	0	0	0	0	0.327273	0.1125
Lamiaceae	Clerodendrum	Clerodendrum lindleyi	0	0	0	0	0	0	0	0.0769231	0.2	0.0875
Lamiaceae	Premna	Premna microphylla	0	0	0	0	0	0	0.0823529	0.169231	1	0.2875
Lamiaceae	Vitex	Vitex trifolia	0	0	0	0	0.0857143	0.0588235	0	0.0769231	0	0
Lardizabalaceae	Akebia	Akebia quinata	0	0	0	0	0.0142857	0.364706	0.164706	0.323077	1	0.225
Lardizabalaceae	Akebia	Akebia trifoliata	0	0	0	0.145455	0	0	0.223529	0.153846	0.527273	0.3
Lardizabalaceae	Decaisnea	Decaisnea insignis	0	0	0	0.0181818	0	0.0117647	0.0117647	0.0769231	0.127273	0.075
Lardizabalaceae	Holboellia	Holboellia coriacea	0	0	0	0	0	0	0.0352941	0.0307692	0.381818	0.175
Lardizabalaceae	Sargentodoxa	Sargentodoxa cuneata	0	0	0	0	0.0857143	0	0.0823529	0.169231	0.727273	0.225
Lardizabalaceae	Stauntonia	Stauntonia chinensis	0	0	0	0	0	0	0.0117647	0	0.109091	0.0125
Lardizabalaceae	Stauntonia	Stauntonia obovata	0	0	0	0	0	0.0352941	0	0	0.6	0.1125
Lauraceae	Cinnamomum	Cinnamomum japonicum	0	0	0	0	0	0	0.0588235	0.0769231	0.345455	0.0125
Lauraceae	Cinnamomum	Cinnamomum subavenium	0	0	0	0	0	0	0	0	0.545455	0.175
Lauraceae	Laurus	Laurus nobilis	0	0	0	0	0	0.0588235	0.0588235	0.0769231	0.127273	0
Lauraceae	Lindera	Lindera angustifolia	0.0555556	0	0	0	0.0142857	0.0705882	0.0705882	0.384615	0.4	0.1875
Lauraceae	Lindera	Lindera chienii	0	0.333333	0	0	0	0	0.141176	0.123077	0.145455	0.1125
Lauraceae	Lindera	Lindera communis	0	0	0	0	0	0.0705882	0.0588235	0.107692	0.472727	0
Lauraceae	Lindera	Lindera erythrocarpa	0	0	0	0	0	0.0705882	0.117647	0.0923077	0.818182	0.25
Lauraceae	Lindera	Lindera glauca	0	0	0.0181818	0.0545455	0.0142857	0.494118	0.317647	0.569231	1	0.8
Lauraceae	Lindera	Lindera praecox	0	0	0	0	0	0.0588235	0.0117647	0.0153846	0.145455	0.2375
Lauraceae	Lindera	Lindera reflexa	0	0	0	0.109091	0.0142857	0	0.258824	0.0153846	0.763636	0.35
Lauraceae	Lindera	Lindera rubronervia	0	0	0	0	0	0	0.105882	0.107692	0.509091	0.2875
Lauraceae	Litsea	Litsea auriculata	0	0	0	0	0	0	0.0588235	0	0.145455	0.0875
Lauraceae	Litsea	Litsea pungens	0	0	0	0.327273	0	0	0.0941176	0	0.145455	0.075
Lauraceae	Litsea	Litsea coreana	0	0	0	0	0	0	0	0.0769231	0.763636	0.225
Lauraceae	Litsea	Litsea coreana var. lanuginosa	0	0	0	0	0	0	0.0117647	0	0.127273	0.1
Lauraceae	Machilus	Machilus leptophylla	0.0555556	0	0	0	0.0714286	0	0	0.0923077	0.472727	0.175
Lauraceae	Machilus	Machilus thunbergii	0	0	0	0	0	0.0588235	0.0117647	0.0769231	0.672727	0.125
Lauraceae	Neolitsea	Neolitsea aurata	0	0	0	0	0	0	0	0	0.527273	0.0875
Lauraceae	Phoebe	Phoebe bournei	0	0	0	0	0	0.0117647	0	0	0.163636	0
Lauraceae	Sassafras	Sassafras tzumu	0	0	0	0	0	0.117647	0.0235294	0.184615	0.327273	0.2375
Leguminosa	Albizia	Albizia kalkora	0.0555556	0.333333	0.0363636	0.163636	0	0.705882	0.341176	0.476923	0.945455	0.2875
Leguminosa	Astragalus	Astragalus chinensis	0	0.333333	0.0909091	0.0545455	0.142857	0.0705882	0.0352941	0.153846	0	0
Leguminosa	Astragalus	Astragalus kifonsanicus	0	0.333333	0.0181818	0.218182	0	0.117647	0.0352941	0	0	0
Leguminosa	Astragalus	Astragalus tataricus	0	0.333333	0.163636	0.181818	0	0.0588235	0	0	0	0
Leguminosa	Astragalus	Astragalus chrysopterus	0	0.333333	0.0727273	0.0727273	0	0	0	0	0	0
Leguminosa	Astragalus	Astragalus discolor	0	0.333333	0.0181818	0.4	0	0	0	0	0	0
Leguminosa	Astragalus	Astragalus limprichtii	0	0.333333	0	0.0727273	0	0	0	0	0	0
Leguminosa	Caragana	Caragana arborescens	0.277778	0.333333	0.272727	0.109091	0.314286	0	0.0117647	0	0	0
Leguminosa	Caragana	Caragana leveillei	0	0.333333	0.109091	0.2	0.214286	0.305882	0.0823529	0.0769231	0	0
Leguminosa	Caragana	Caragana opulens	0	0.333333	0	0.254545	0	0.0588235	0	0	0	0
Leguminosa	Caragana	Caragana stipitata	0	0.333333	0.0545455	0.163636	0	0	0.0705882	0	0	0
Leguminosa	Caragana	Caragana zahlbruckneri	0.166667	0.333333	0.272727	0.0727273	0.0142857	0	0	0	0	0
Leguminosa	Cicer	Cicer arietinum	0.0555556	0	0.0181818	0.0181818	0	0	0	0	0	0
Leguminosa	Gleditsia	Gleditsia microphylla	0.0555556	0.333333	0.254545	0.345455	0	0.188235	0.141176	0.0769231	0	0
Leguminosa	Glycyrrhiza	Glycyrrhiza squamulosa	0	0.333333	0.0363636	0.218182	0	0	0.0823529	0	0	0
Leguminosa	Gueldenstaedtia	Gueldenstaedtia taihangensis	0	0	0.0545455	0.0181818	0	0	0	0	0	0
Leguminosa	Gueldenstaedtia	Gueldenstaedtia verna	0	0	0.0181818	0	0	0.176471	0	0.0153846	0	0
Leguminosa	Hedysarum	Hedysarum alpinum	0	0	0.0181818	0.0181818	0	0	0.0352941	0	0	0
Leguminosa	Hedysarum	Hedysarum inundatum	0	0.333333	0.0363636	0.127273	0	0	0	0	0	0
Leguminosa	Lens	Lens lens	0.0555556	0.333333	0.0909091	0.109091	0	0.0588235	0.0941176	0.107692	0	0.0125
Leguminosa	Lespedeza	Lespedeza potaninii	0.111111	0.333333	0.0909091	0.672727	0.0142857	0.247059	0.129412	0.0923077	0	0.0125
Leguminosa	Oxytropis	Oxytropis coerulea	0.222222	0.333333	0.181818	0.236364	0	0	0.0705882	0	0	0
Leguminosa	Oxytropis	Oxytropis moellendorffii	0.111111	0.333333	0.0363636	0.0545455	0	0	0	0	0	0
Leguminosa	Oxytropis	Oxytropis myriophylla	0	0.333333	0.127273	0.218182	0.114286	0	0	0	0	0
Leguminosa	Psoralea	Psoralea corylifolium	0.222222	0.666667	0.109091	0	0.0714286	0.0117647	0	0.0923077	0.0909091	0
Leguminosa	Sophora	Sophora flavescens	0.0555556	0.333333	0	0.0181818	0.0714286	0.305882	0.0352941	0.184615	0	0.0125
Leguminosa	Sphaerophysa	Sphaerophysa salsula	0	0.333333	0.0909091	0.327273	0.0142857	0.0588235	0.0117647	0	0	0
Leguminosa	Thermopsis	Thermopsis alpina	0	0.333333	0.0545455	0.0181818	0	0	0	0	0	0
Leguminosa	Trifolium	Trifolium lupinaster	0	0.333333	0.0909091	0	0.271429	0	0	0	0	0
Leguminosae	Aeschynomene	Aeschynomene indica	0.0555556	0.333333	0.0909091	0	0.371429	0.247059	0.117647	0.646154	0.618182	0.6
Leguminosae	Amphicarpaea	Amphicarpaea edgeworthii	0.0555556	0	0.0909091	0.0181818	0.285714	0.152941	0.117647	0.338462	0.327273	0.1
Leguminosae	Apios	Apios fortunei	0	0	0	0	0	0.0235294	0.0117647	0.230769	0.290909	0.025
Leguminosae	Astragalus	Astragalus capillipes	0.5	0.666667	0.272727	0.636364	0	0	0	0	0	0
Leguminosae	Astragalus	Astragalus laxmannii	0.333333	0.333333	0.309091	0.945455	0.185714	0.0588235	0.129412	0.0307692	0	0.0125
Leguminosae	Astragalus	Astragalus melilotoides	0.388889	0.666667	0.527273	1	0.2	0.305882	0.270588	0	0	0
Leguminosae	Astragalus	Astragalus sinicus	0.0555556	0	0	0	0	0.0588235	0.0588235	0.353846	0.527273	0.175
Leguminosae	Caesalpinia	Caesalpinia decapetala	0	0	0	0	0	0	0.0352941	0.2	0.690909	0.1125
Leguminosae	Canavalia	Canavalia gladiata	0	0.333333	0	0	0	0	0.0117647	0	0.0545455	0
Leguminosae	Caragana	Caragana manshurica	0	0.333333	0.0727273	0.127273	0.0714286	0	0	0	0	0
Leguminosae	Cassia	Cassia leschenaultiana	0	0	0	0	0	0	0	0.184615	0.2	0.0125
Leguminosae	Cassia	Cassia mimosoides	0.0555556	0.666667	0.127273	0	0.285714	0.188235	0.0705882	0.153846	0.181818	0.0125
Leguminosae	Cassia	Cassia nomame	0.388889	0.333333	0.218182	0	0.614286	0.364706	0.0235294	0.353846	0.345455	0.0625
Leguminosae	Cercis	Cercis chingii	0	0	0	0	0	0	0	0.0769231	0.109091	0.0125
Leguminosae	Cercis	Cercis glabra	0	0	0	0	0	0.0588235	0.0117647	0.0769231	0.0363636	0.1
Leguminosae	Cladrastis	Cladrastis platycarpum	0	0	0	0	0	0	0	0.0153846	0.0545455	0.025
Leguminosae	Cladrastis	Cladrastis wilsonii	0	0	0	0	0	0	0	0	0.218182	0.175
Leguminosae	Colutea	Colutea arborescens	0.0555556	0	0	0	0.142857	0.0588235	0	0.0769231	0	0
Leguminosae	Crotalaria	Crotalaria brownii	0.0555556	0.333333	0.109091	0	0.342857	0.117647	0.105882	0.446154	0.654545	0.475
Leguminosae	Crotalaria	Crotalaria ferruginea	0	0	0	0	0	0	0.0117647	0	0.4	0.1
Leguminosae	Crotalaria	Crotalaria incana	0.0555556	0	0	0	0	0	0	0.0153846	0.0909091	0.0125
Leguminosae	Crotalaria	Crotalaria spectabilis	0	0	0	0	0	0	0	0	0.490909	0.0625
Leguminosae	Dalbergia	Dalbergia hancei	0	0	0.0181818	0	0	0	0	0.0769231	0.0909091	0.0625
Leguminosae	Dalbergia	Dalbergia hupeana	0	0	0	0.0363636	0.0142857	0.305882	0.235294	0.615385	0.618182	0.4625
Leguminosae	Dumasia	Dumasia truncata	0	0	0	0	0	0	0.0823529	0	0.109091	0.05
Leguminosae	Dunbaria	Dunbaria villosa	0	0	0	0	0	0	0	0.353846	0.436364	0.0625
Leguminosae	Gueldenstaedtia	Gueldenstaedtia stenophylla	0.0555556	0.333333	0.0727273	0.418182	0.1	0.0823529	0.188235	0.0461538	0	0
Leguminosae	Gymnocladus	Gymnocladus chinensis	0	0	0	0	0	0	0	0.0153846	0.309091	0.2
Leguminosae	Indigofera	Indigofera amblyantha	0.0555556	0.333333	0	0.290909	0.0142857	0	0.2	0.0307692	0.236364	0.0625
Leguminosae	Indigofera	Indigofera carlesii	0	0	0	0.109091	0	0	0.211765	0.153846	0.0181818	0.1375
Leguminosae	Indigofera	Indigofera fortunei	0	0	0	0	0	0	0.0941176	0.261538	0.327273	0.25
Leguminosae	Indigofera	Indigofera bungeana	0	0	0	0.0545455	0.0142857	0	0.247059	0.446154	0.763636	0.35
Leguminosae	Indigofera	Indigofera decora	0	0	0	0	0	0	0	0	0.0909091	0.1375
Leguminosae	Lathyrus	Lathyrus davidii	0.388889	0.666667	0.290909	0.454545	0.671429	0.105882	0.0941176	0	0.0909091	0.025
Leguminosae	Lathyrus	Lathyrus odoratus	0.0555556	0	0	0	0	0	0.0705882	0.0769231	0.0909091	0
Leguminosae	Lathyrus	Lathyrus sativus	0.0555556	0	0.0181818	0.0181818	0.0714286	0	0	0.0153846	0	0
Leguminosae	Lathyrus	Lathyrus japonicus	0	0.333333	0.0363636	0	0.0142857	0.0117647	0	0	0	0
Leguminosae	Lespedeza	Lespedeza buergeri	0	0	0.0363636	0.145455	0.0142857	0	0.364706	0.246154	0.218182	0.2125
Leguminosae	Lespedeza	Lespedeza caraganae	0.166667	0.666667	0.2	0.618182	0.142857	0.494118	0.0470588	0.0769231	0	0.0125
Leguminosae	Lespedeza	Lespedeza chinensis	0.0555556	0	0	0	0	0.0588235	0.0941176	0.323077	0.545455	0.2
Leguminosae	Lespedeza	Lespedeza davidii	0	0	0.0181818	0	0	0.0117647	0	0.169231	0.727273	0.0375
Leguminosae	Lespedeza	Lespedeza fordii	0	0	0	0	0	0	0.0588235	0	0.0181818	0.1875
Leguminosae	Lespedeza	Lespedeza pilosa	0	0	0	0	0.0142857	0	0	0.261538	0.527273	0.3375
Leguminosae	Lespedeza	Lespedeza pseudomaximowiczii	0	0	0	0	0	0	0.235294	0.169231	0.0545455	0.125
Leguminosae	Lespedeza	Lespedeza viatorum	0	0	0	0	0	0	0.0235294	0	0.290909	0.0125
Leguminosae	Lespedeza	Lespedeza thunbergii	0	0.333333	0.109091	0.0363636	0	0.117647	0.282353	0.446154	0.872727	0.25
Leguminosae	Maackia	Maackia amurensis	0.0555556	0.333333	0.0363636	0	0.371429	0.176471	0	0.153846	0	0
Leguminosae	Maackia	Maackia hupehensis	0	0	0	0	0	0	0.0117647	0.0769231	0.0727273	0.075
Leguminosae	Maackia	Maackia tenuifolia	0	0	0	0	0	0	0.0588235	0.0769231	0.254545	0.0125
Leguminosae	Medicago	Medicago minima	0	0.333333	0	0.181818	0	0.164706	0.352941	0.430769	0.0181818	0.1375
Leguminosae	Medicago	Medicago ruthenica	0.166667	0.333333	0.363636	0.836364	0.0714286	0.141176	0.0470588	0	0	0
Leguminosae	MelilotusMiller	Melilotus dentatus	0	0.333333	0.0545455	0.109091	0	0	0	0	0	0
Leguminosae	Millettia	Millettia reticulata	0	0.333333	0	0	0	0	0	0.230769	0.690909	0.1125
Leguminosae	Ormosia	Ormosia henryi	0	0	0	0.0363636	0	0	0	0	0.363636	0.025
Leguminosae	Ormosia	Ormosia hosiei	0	0	0	0	0	0.0117647	0	0.0769231	0.109091	0
Leguminosae	Phaseolus	Phaseolus vulgaris	0.0555556	0.333333	0.109091	0.218182	0.0714286	0.129412	0	0.292308	0.127273	0
Leguminosae	Pueraria	Pueraria montana	0	0	0.0181818	0	0.0714286	0.0588235	0.0235294	0	0.0909091	0.0125
Leguminosae	Rhynchosia	Rhynchosia volubilis	0	0.333333	0	0	0	0	0.164706	0.446154	0.618182	0.075
Leguminosae	Rhynchosia	Rhynchosia acuminatifolia	0	0	0	0	0	0	0	0.169231	0.127273	0.0875
Leguminosae	Robinia	Robinia hispida	0.0555556	0	0	0.0909091	0	0.247059	0.0235294	0.153846	0	0
Leguminosae	Sesbania	Sesbania cannabina	0	0	0.0181818	0	0.0714286	0.0588235	0.129412	0.415385	0.818182	0.125
Leguminosae	Thermopsis	Thermopsis lupinoides	0.0555556	0	0.0181818	0	0	0	0.0588235	0.261538	0.290909	0.0625
Leguminosae	Trigonella	Trigonella caerulea	0.0555556	0	0	0	0.0714286	0	0	0.0923077	0	0
Leguminosae	Trigonella	Trigonella foenum-graecum	0	0	0.0181818	0	0.0714286	0	0	0.0769231	0	0
Leguminosae	Vicia	Vicia bungei	0.222222	0.333333	0.363636	0.654545	0.142857	0.4	0.235294	0.107692	0	0.025
Leguminosae	Vicia	Vicia deflexa	0	0	0	0	0	0	0	0.107692	0.127273	0.0625
Leguminosae	Vicia	Vicia japonica	0	0.333333	0.0181818	0	0.142857	0	0	0	0	0
Leguminosae	Vicia	Vicia kioshanica	0	0.333333	0.0181818	0.109091	0	1	0.164706	0.153846	0.0181818	0.025
Leguminosae	Vicia	Vicia pilosa	0.0555556	0	0	0	0	0.376471	0.188235	0.276923	0.109091	0.0125
Leguminosae	Vicia	Vicia amoena f. albiflora	0	0	0.0181818	0.0545455	0.0857143	0	0.0117647	0	0	0
Leguminosae	Vicia	Vicia amoena var. oblongifolia	0	0.333333	0.0545455	0.127273	0.242857	0	0	0.0153846	0	0
Leguminosae	Vigna	Vigna vexillata	0	0	0	0	0	0	0.0588235	0.6	0.381818	0.1875
Leguminosae	Wisteria	Wisteria venusta	0	0	0	0	0.0714286	0	0.0117647	0	0	0
Leguminosae	Wisteria	Wisteria villosa	0	0	0	0	0	0.117647	0.0117647	0.338462	0.0181818	0
Lemnaceae	Lemna	Lemna trisulca	0	0	0	0.0181818	0.0714286	0.0117647	0.0117647	0	0	0
Lemnaceae	Wolffia	Wolffia arrhiza	0.0555556	0	0	0	0	1	0	0.0769231	0	0
Lentibulariaceae	Utricularia	Utricularia aurea	0	0	0	0.0181818	0	0.0705882	0.0235294	0.169231	0.309091	0.125
Lentibulariaceae	Utricularia	Utricularia australis	0	0	0	0	0	0	0	0.169231	0.218182	0.0125
Lentibulariaceae	Utricularia	Utricularia bifida	0	0	0	0	0	0.117647	0.0235294	0.184615	0.236364	0.2
Lentibulariaceae	Utricularia	Utricularia caerulea	0	0	0	0	0	0	0	0.0923077	0.0727273	0
Lentibulariaceae	Utricularia	Utricularia striatula	0	0	0	0	0	0	0	0	0.127273	0.075
Lentibulariaceae	Utricularia	Utricularia vulgaris	0.222222	0.333333	0.0727273	0	0.1	0.0117647	0	0	0.0181818	0.0125
Liliaceae	Aletris	Aletris spicata	0	0	0.0181818	0.0181818	0	0.0117647	0.317647	0.0923077	0.727273	0.175
Liliaceae	Allium	Allium chinense	0	0	0	0	0	0.0588235	0.0117647	0.169231	0.290909	0.0125
Liliaceae	Allium	Allium ochotense	0.222222	0.333333	0.327273	0.163636	0	0.0588235	0.117647	0.153846	0.127273	0.0125
Liliaceae	Allium	Allium prattii	0	0	0	0	0	0.0117647	0.0823529	0	0	0
Liliaceae	Allium	Allium tenuissimum	0.277778	0.333333	0.436364	0.4	0.285714	0.258824	0.0823529	0.153846	0	0.0125
Liliaceae	Asparagus	Asparagus cochinchinensis	0	0	0.0545455	0.309091	0.142857	0.129412	0.258824	0.353846	0.690909	0.175
Liliaceae	Asparagus	Asparagus filicinus	0	0	0.0181818	0.254545	0	0	0.164706	0.0769231	0.145455	0
Liliaceae	Asparagus	Asparagus longiflorus	0.166667	0.333333	0.0363636	0.272727	0.0142857	0.305882	0.0352941	0	0	0
Liliaceae	Asparagus	Asparagus oligoclonos	0.111111	0	0.0363636	0.0181818	0.771429	0.352941	0.0352941	0	0	0
Liliaceae	Cardiocrinum	Cardiocrinum cathayanum	0	0	0	0	0	0	0.0941176	0.0153846	0.4	0.0875
Liliaceae	Convallaria	Convallaria keiskei	0.277778	0.666667	0.236364	0.163636	0.271429	0.117647	0.0352941	0	0.0909091	0
Liliaceae	Fritillaria	Fritillaria monantha	0	0	0	0	0	0	0.0117647	0	0.0181818	0.075
Liliaceae	Fritillaria	Fritillaria thunbergii	0	0	0	0.0181818	0	0	0.0117647	0.107692	0.236364	0
Liliaceae	Hemerocallis	Hemerocallis citrina	0.222222	0.333333	0.163636	0.0181818	0.142857	0.376471	0.0823529	0.230769	0.327273	0
Liliaceae	Heterosmilax	Heterosmilax japonica	0	0	0	0	0	0	0	0	0.0909091	0.075
Liliaceae	Hosta	Hosta plantaginea	0.111111	0	0.0181818	0	0.0714286	0.0588235	0.129412	0	0.218182	0
Liliaceae	Hosta	Hosta ventricosa	0	0	0	0.0909091	0.0714286	0.0588235	0.0705882	0.123077	0.454545	0.225
Liliaceae	Lilium	Lilium callosum	0	0	0	0	0.0857143	0	0.129412	0.0769231	0.127273	0.0125
Liliaceae	Lilium	Lilium lancifolium	0	0.333333	0	0.0363636	0.171429	0.117647	0.0941176	0.0923077	0.236364	0.075
Liliaceae	Lilium	Lilium speciosum	0	0	0	0	0	0	0	0	0.2	0.075
Liliaceae	Liriope	Liriope graminifolia	0.111111	0.333333	0.181818	0.181818	0	0.188235	0.188235	0.169231	0.363636	0.0625
Liliaceae	Liriope	Liriope minor	0	0	0	0	0.0857143	0	0	0.230769	0.109091	0.025
Liliaceae	Ophiopogon	Ophiopogon intermedius	0	0	0	0	0	0	0.0352941	0	0.0363636	0
Liliaceae	Ophiopogon	Ophiopogon japonicus	0.111111	0	0.0181818	0.0181818	0	0.0588235	0.317647	0.292308	0.727273	0.175
Liliaceae	Paris	Paris polyphylla	0	0	0.0363636	0.0727273	0	0	0.2	0.0769231	0.309091	0.0875
Liliaceae	Paris	Paris verticillata	0.222222	0.333333	0.254545	0.345455	0.242857	0	0.0588235	0	0.0545455	0.175
Liliaceae	Polygonatum	Polygonatum cyrtonema	0	0	0	0.0181818	0	0	0.0941176	0.0923077	0.672727	0.2125
Liliaceae	Polygonatum	Polygonatum filipes	0	0	0	0	0	0	0	0	0.6	0.1625
Liliaceae	Polygonatum	Polygonatum zanlanscianense	0	0	0	0.0181818	0	0	0.0705882	0	0	0.0375
Liliaceae	Reineckia	Reineckea carnea	0	0	0	0	0	0.0235294	0.0117647	0.0769231	0.181818	0
Liliaceae	Rohdea	Rohdea japonica	0	0	0	0	0	0.0588235	0	0.0923077	0.127273	0.1375
Liliaceae	Smilax	Smilax china	0	0	0	0.0181818	0.0285714	0.294118	0.305882	0.430769	0.909091	0.4
Liliaceae	Smilax	Smilax davidiana	0	0	0	0	0	0	0.0705882	0.0923077	0.545455	0.225
Liliaceae	Smilax	Smilax discotis	0	0	0	0	0	0	0.0588235	0	0.218182	0.075
Liliaceae	Smilax	Smilax glabra	0	0	0	0	0	0	0.0117647	0.0153846	0.745455	0.275
Liliaceae	Smilax	Smilax glaucochina	0	0	0	0.0181818	0	0	0.129412	0.107692	0.4	0.2
Liliaceae	Smilax	Smilax nipponica	0	0	0	0	0.1	0.117647	0.0705882	0	0.254545	0.025
Liliaceae	Smilax	Smilax riparia	0	0	0	0.0181818	0.4	0.447059	0.235294	0.353846	0.8	0.2125
Liliaceae	Smilax	Smilax sieboldii	0	0	0	0	0.0714286	0.376471	0.129412	0.107692	0.218182	0.05
Liliaceae	Smilax	Smilax stans	0.166667	0.333333	0.163636	0.727273	0	0.117647	0.2	0	0.0545455	0.15
Liliaceae	Speirantha	Speirantha gardenii	0	0	0	0	0	0	0	0	0.127273	0.0875
Liliaceae	Tricyrtis	Tricyrtis macropoda	0	0	0.0181818	0	0	0	0.0941176	0.107692	0.509091	0.3
Liliaceae	Trillium	Trillium tschonoskii	0	0	0	0	0	0	0	0	0.0545455	0.0875
Liliaceae	Tulipa	Tulipa edulis	0	0.333333	0	0	0.142857	0.211765	0.129412	0.153846	0.290909	0.0625
Liliaceae	Veratrum	Veratrum schindleri	0	0	0	0	0	0	0	0.0769231	0.454545	0.025
Liliaceae	Allium	Allium anisopodium	0.166667	0.333333	0.109091	0.127273	0.142857	0.0588235	0.0352941	0	0	0
Liliaceae	Allium	Allium bidentatum	0.166667	0.666667	0.236364	0.0727273	0.0285714	0	0.0117647	0	0	0
Liliaceae	Allium	Allium longistylum	0.277778	0.333333	0.218182	0.272727	0.0714286	0	0	0	0	0
Liliaceae	Allium	Allium paepalanthoides	0	0	0	0.254545	0	0	0.0588235	0	0	0
Liliaceae	Allium	Allium polyrhizum	0	0.333333	0.0181818	0.0181818	0.0714286	0	0.0117647	0	0	0
Liliaceae	Allium	Allium ramosum	0.333333	0.333333	0.345455	0.4	0.371429	0.294118	0.0235294	0	0	0
Liliaceae	Allium	Allium senescens	0.388889	0.666667	0.472727	0.327273	0.285714	0.0117647	0.188235	0	0	0
Liliaceae	Allium	Allium tubiflorum	0.111111	0.333333	0.0545455	0.0545455	0	0	0.0941176	0	0	0
Liliaceae	Allium	Allium flavum	0.0555556	0.333333	0.254545	0.181818	0.1	0.117647	0.0117647	0	0	0
Liliaceae	Allium	Allium thunbergii	0.166667	0.333333	0.127273	0.0181818	0.614286	0.0705882	0.0352941	0.153846	0.109091	0
Liliaceae	Allium	Allium yanchiense	0	0.333333	0.0181818	0.0363636	0	0	0	0	0	0
Liliaceae	Anemarrhena	Anemarrhena asphodeloides	0.388889	0.666667	0.490909	0.127273	0.457143	0.188235	0.0117647	0	0.0181818	0.0625
Liliaceae	Asparagus	Asparagus dauricus	0.333333	0.666667	0.636364	0.163636	0.471429	0.176471	0.0235294	0.0769231	0	0
Liliaceae	Asparagus	Asparagus schoberioides	0.388889	0.666667	0.218182	0.181818	0.5	0.270588	0.117647	0	0	0
Liliaceae	Asparagus	Asparagus trichophyllus	0.444444	0.666667	0.436364	0.527273	0.157143	0.0588235	0.0117647	0	0	0.0125
Liliaceae	Asparagus	Asparagus brachyphyllus	0.111111	0.333333	0.0727273	0.272727	0.128571	0.176471	0.0117647	0	0	0
Liliaceae	Clintonia	Clintonia udensis	0.111111	0.333333	0.109091	0	0.157143	0.0588235	0.0117647	0	0	0.0625
Liliaceae	Hemerocallis	Hemerocallis esculenta	0.0555556	0.333333	0.0909091	0.218182	0	0.0588235	0.0235294	0	0	0
Liliaceae	Hemerocallis	Hemerocallis lilioasphodelus	0.111111	0.333333	0.109091	0.0727273	0.285714	0.117647	0.0235294	0.0307692	0	0.0125
Liliaceae	Hemerocallis	Hemerocallis minor	0.333333	0.666667	0.327273	0.290909	0.2	0.117647	0	0.0153846	0.0181818	0
Liliaceae	Lilium	Lilium concolor	0.333333	0.333333	0.218182	0.0727273	0.4	0.188235	0.152941	0	0	0
Liliaceae	Lilium	Lilium davidii	0	0	0	0.109091	0	0	0.0352941	0	0	0
Liliaceae	Lilium	Lilium pumilum	0.388889	0.666667	0.527273	0.763636	0.342857	0.0823529	0.129412	0	0	0.125
Liliaceae	Lloydia	Lloydia serotina	0	0.333333	0.0363636	0.109091	0	0	0	0	0	0
Liliaceae	Polygonatum	Polygonatum humile	0.111111	0.333333	0.109091	0.0545455	0.5	0	0	0.0769231	0.0181818	0
Liliaceae	Polygonatum	Polygonatum involucratum	0.222222	0.333333	0.145455	0.0545455	0.4	0.0588235	0.0352941	0	0	0
Liliaceae	Polygonatum	Polygonatum macropodum	0.166667	0	0.0363636	0	0.257143	0.105882	0	0	0	0
Liliaceae	Polygonatum	Polygonatum megaphyllum	0	0	0.0181818	0.145455	0	0	0	0	0	0
Liliaceae	Smilax	Smilax scobinicaulis	0	0.333333	0.0909091	0.363636	0	0	0.141176	0.0153846	0.127273	0.025
Liliaceae	Veratrum	Veratrum nigrum	0.333333	0.666667	0.363636	0.218182	0.242857	0.0588235	0.129412	0	0	0.0625
Liliaceae	Zigadenus	Anticlea sibirica	0	0.333333	0.0545455	0.0363636	0	0	0	0	0	0
Linaceae	Linum	Linum perenne	0	0.333333	0.0909091	0.236364	0.0142857	0	0	0.0769231	0	0
Linaceae	Linum	Linum stelleroides	0.388889	0.666667	0.509091	0.818182	0.742857	0.294118	0.164706	0.0769231	0	0
Linderniaceae	Lindernia	Lindernia crustacea	0	0	0	0	0.0714286	0.223529	0.0235294	0.246154	0.327273	0.225
Linderniaceae	Lindernia	Lindernia procumbens	0.0555556	0	0.0181818	0	0.285714	0.282353	0.129412	0.4	0.363636	0.45
Linderniaceae	Lindernia	Lindernia antipoda	0	0	0	0	0	0	0.0705882	0.292308	0.381818	0.2125
Loganiaceae	Buddleja	Buddleja davidii	0.0555556	0	0	0	0	0.529412	0.305882	0.0769231	0.109091	0.0125
Loganiaceae	Buddleja	Buddleja lindleyana	0.0555556	0	0	0	0	0.235294	0.235294	0.123077	1	0.375
Loganiaceae	Gardneria	Gardneria angustifolia	0	0	0	0	0	0	0	0	0.0181818	0.0625
Loganiaceae	Gardneria	Gardneria lanceolata	0	0	0	0	0	0	0	0	0.0363636	0.1
Loganiaceae	Gardneria	Gardneria multiflora	0	0	0	0	0	0	0.0705882	0.0153846	0.709091	0.2
Loganiaceae	Mitrasacme	Mitrasacme pygmaea	0	0	0	0	0	0.0117647	0	0.153846	0.236364	0
Loganiaceae	Mitrasacme	Mitrasacme indica	0	0	0	0	0	0.0705882	0	0.153846	0	0
Loganiaceae	Buddleja	Buddleja alternifolia	0.0555556	0	0	0.0909091	0	0.0588235	0.0117647	0.0769231	0	0
Loganiaceae	Buddleja	Buddleja officinalis	0.0555556	0	0	0	0.0142857	0.0117647	0.0705882	0	0.0909091	0.0625
Loranthaceae	Loranthus	Loranthus tanakae	0.111111	0.333333	0.0181818	0.290909	0.0714286	0.0235294	0	0	0	0
Loranthaceae	Taxillus	Taxillus kaempferi	0	0	0	0	0	0	0	0	0.0727273	0.0625
Loranthaceae	Taxillus	Taxillus levinei	0	0	0	0	0	0	0	0	0.363636	0.0125
Loranthaceae	Taxillus	Taxillus sutchuenensis	0	0	0	0	0	0	0	0	0.127273	0.0125
Lythraceae	Ammannia	Ammannia baccifera	0.222222	0.666667	0.0363636	0	0.0714286	0.0588235	0.0588235	0.353846	0.109091	0.2625
Lythraceae	Ammannia	Ammannia auriculata	0.111111	0	0.0363636	0	0	0.0705882	0.152941	0.476923	0.163636	0.0125
Lythraceae	Lagerstroemia	Lagerstroemia subcostata	0	0	0	0	0	0.129412	0.0588235	0.0153846	0.2	0.1
Lythraceae	Lythrum	Lythrum salicaria	0	0	0	0	0.228571	0.470588	0	0	0	0
Lythraceae	Rotala	Rotala indica	0	0	0	0	0.0714286	0.0823529	0.0352941	0.338462	0.272727	0.2625
Lythraceae	Rotala	Rotala mexicana	0	0	0	0	0	0.0352941	0.0117647	0.246154	0.0363636	0
Lythraceae	Trapa	Trapa incisa	0	0	0.0181818	0	0.0714286	0	0.0823529	0.0769231	0.0909091	0.15
Lythraceae	Trapa	Trapa incisa	0	0	0.0181818	0	0	0	0	0.169231	0.290909	0.175
Lythraceae	Trapa	Trapa mammillifera	0.0555556	0.333333	0.0545455	0	0	0.0823529	0.117647	0.184615	0.181818	0
Lythraceae	Trapa	Trapa natans	0.0555556	0	0	0.0181818	0.0857143	0.0588235	0.0117647	0	0	0
Magnoliaceae	Illicium	Illicium henryi	0	0	0	0	0	0	0.0941176	0.0769231	0.127273	0.1625
Magnoliaceae	Illicium	Illicium lanceolatum	0	0	0	0.0181818	0	0	0.0705882	0.107692	0.709091	0.325
Magnoliaceae	Liriodendron	Liriodendron chinense	0	0	0	0	0.0714286	0.352941	0.0941176	0.0769231	0.327273	0.1375
Magnoliaceae	Liriodendron	Liriodendron tulipifera	0	0	0	0	0	0.129412	0.0588235	0.0769231	0.0909091	0
Magnoliaceae	Magnolia	Magnolia cylindrica	0	0	0	0	0.0142857	0.0588235	0.0588235	0.0769231	0.254545	0.15
Magnoliaceae	Magnolia	Magnolia sieboldii	0	0	0.0181818	0	0.371429	0.0588235	0	0	0.127273	0.125
Magnoliaceae	Manglietia	Manglietia yuyuanensis	0	0	0	0	0	0	0	0.0769231	0.309091	0.0875
Magnoliaceae	Schisandra	Schisandra chinensis	0.333333	0.666667	0.309091	0.345455	0.657143	0.0705882	0.117647	0	0.0363636	0
Magnoliaceae	Schisandra	Schisandra sphenanthera	0	0	0.0181818	0.254545	0	0	0.223529	0.0769231	0.563636	0.1125
Malvaceae	Abelmoschus	Abelmoschus esculentus	0	0	0	0.0363636	0	0.117647	0	0	0	0
Malvaceae	Abutilon	Abutilon pictum	0	0	0	0	0	0.0588235	0	0	0.0909091	0
Malvaceae	Corchoropsis	Corchoropsis psilocarpa	0.277778	0.333333	0.0545455	0	0.157143	0.494118	0.0705882	0.338462	0	0.075
Malvaceae	Corchorus	Corchorus aestuans	0	0	0	0	0	0.2	0.0235294	0.184615	0.436364	0.3125
Malvaceae	Corchorus	Corchorus capsularis	0	0	0	0	0.0714286	0.0588235	0	0.0153846	0.163636	0.075
Malvaceae	Hibiscus	Hibiscus cannabinus	0.0555556	0.333333	0.0181818	0	0.0142857	0	0.0705882	0	0.109091	0.0125
Malvaceae	Hibiscus	Hibiscus moscheutos	0	0.333333	0.0363636	0	0.0714286	0.188235	0	0.0769231	0.0909091	0
Malvaceae	Hibiscus	Hibiscus mutabilis	0.0555556	0	0	0.0909091	0	0.188235	0.129412	0.0769231	0.509091	0.075
Malvaceae	Malva	Malva verticillata	0.277778	0.333333	0.290909	0.527273	0	0.0588235	0.0705882	0.230769	0.218182	0
Malvaceae	Melochia	Melochia corchorifolia	0	0	0	0	0	0.0588235	0.0588235	0.338462	0.163636	0.225
Malvaceae	Tilia	Tilia endochrysea	0	0	0	0	0	0	0	0	0.272727	0.0125
Malvaceae	Tilia	Tilia henryana	0	0	0	0	0.0714286	0	0.235294	0.0923077	0	0.025
Malvaceae	Tilia	Tilia japonica	0	0	0	0	0	0.176471	0.0235294	0.0769231	0.127273	0.1
Malvaceae	Tilia	Tilia mandshurica	0.333333	0.666667	0.218182	0.0181818	0.528571	0.376471	0	0.0769231	0	0
Malvaceae	Tilia	Tilia miqueliana	0.0555556	0	0	0	0	0.235294	0.0823529	0.2	0.345455	0.1375
Malvaceae	Tilia	Tilia mongolica	0.388889	0.666667	0.490909	0.563636	0.328571	0.129412	0.0941176	0	0	0
Malvaceae	Tilia	Tilia paucicostata	0	0	0.0363636	0.563636	0	0.0588235	0.2	0.0769231	0.0909091	0.075
Malvaceae	Tilia	Tilia tuan	0	0	0.0181818	0	0	0.0588235	0.152941	0.0769231	0.0181818	0
Malvaceae	Urena	Urena lobata	0	0	0.0181818	0	0	0	0	0	0.418182	0.125
Malvaceae	Malva	Malva pusilla	0.0555556	0.333333	0.0545455	0.363636	0	0.258824	0.282353	0.0769231	0	0
Mazaceae	Mazus	Mazus caducifer	0	0	0	0	0	0	0	0.0769231	0.309091	0.2
Mazaceae	Mazus	Mazus gracilis	0	0	0	0	0	0	0.0941176	0.123077	0.2	0.1625
Mazaceae	Mazus	Mazus miquelii	0.0555556	0	0	0	0	0	0.117647	0.246154	0.163636	0.15
Melastomataceae	Bredia	Bredia quadrangularis	0	0	0	0	0	0	0	0	0.272727	0.075
Melastomataceae	Melastoma	Melastoma dodecandrum	0	0	0	0	0.0142857	0	0	0.0153846	0.490909	0.0625
Melastomataceae	Osbeckia	Osbeckia chinensis	0	0	0	0	0	0	0	0.261538	0.363636	0.125
Meliaceae	Melia	Melia azedarach	0.0555556	0.333333	0.109091	0.181818	0	0.741176	0.388235	0.876923	0.6	0.45
Menispermaceae	Stephania	Stephania cephalantha	0	0	0	0	0	0	0.0705882	0.246154	0.309091	0.15
Menispermaceae	Stephania	Stephania japonica	0	0	0	0	0	0	0.0823529	0.276923	0.709091	0.4125
Menispermaceae	Stephania	Stephania tetrandra	0	0	0	0	0.0142857	0	0	0	0.490909	0.3
Menyanthaceae	Menyanthes	Menyanthes trifoliata	0.0555556	0	0.0181818	0	0	0	0	0	0	0
Moraceae	Broussonetia	Broussonetia kaempferi	0	0	0	0	0	0	0	0	0.145455	0.0625
Moraceae	Broussonetia	Broussonetia monoica	0	0	0	0	0.0714286	0	0.294118	0.0923077	0.727273	0.325
Moraceae	Cudrania	Cudrania cochinchinensis	0	0	0	0	0	0	0	0	0.563636	0.15
Moraceae	Fatoua	Fatoua villosa	0.222222	0	0	0	0	0	0.0588235	0.261538	0.381818	0.2125
Moraceae	Ficus	Ficus heteromorpha	0	0	0	0.0545455	0	0	0.270588	0.0923077	0.418182	0.0125
Moraceae	Ficus	Ficus pandurata	0	0	0	0	0	0	0	0	0.363636	0.0125
Moraceae	Ficus	Ficus pumila	0	0	0	0	0	0	0.0705882	0.338462	1	0.25
Moraceae	Ficus	Ficus sarmentosa	0	0	0	0	0	0	0	0.0923077	0.690909	0.1
Moraceae	Ficus	Ficus erecta	0	0	0	0	0	0	0.0588235	0.0769231	0.763636	0
Moraceae	Ficus	Ficus sarmentosa	0	0	0	0	0	0	0.0941176	0.261538	0.490909	0.2125
Moraceae	Morus	Morus australis	0.166667	0	0.0727273	0.0545455	0.271429	0.188235	0.176471	0.169231	0.618182	0.225
Moraceae	Morus	Morus cathayana	0.166667	0.333333	0.0545455	0	0	0.0705882	0.2	0.169231	0.363636	0.2
Musaceae	Musa	Musa basjoo	0	0	0	0	0	0.0588235	0	0	0.127273	0
Myricaceae	Myrica	Morella rubra	0	0	0	0	0.214286	0	0	0.246154	0.909091	0.1375
Myrsinaceae	Ardisia	Ardisia crenata	0	0	0	0	0	0	0	0	1	0.1875
Myrsinaceae	Ardisia	Ardisia crispa	0	0	0	0	0	0.0588235	0	0	0.218182	0.125
Myrsinaceae	Ardisia	Ardisia hanceana	0	0	0	0	0	0	0	0	0.472727	0.0125
Myrsinaceae	Ardisia	Ardisia japonica	0	0	0.0181818	0	0	0.0588235	0.0823529	0.461538	0.909091	0.4
Myrsinaceae	Maesa	Maesa japonica	0	0	0	0	0	0	0	0.107692	0.654545	0.175
Myrsinaceae	Myrsine	Myrsine stolonifera	0	0	0	0	0	0	0	0	0.236364	0.1375
Myrtaceae	Eucalyptus	Eucalyptus camaldulensis	0	0	0	0	0	0	0	0.0769231	0.0909091	0
Myrtaceae	Eucalyptus	Eucalyptus robusta	0	0	0	0	0	0	0	0.0769231	0.163636	0
Myrtaceae	Syzygium	Syzygium buxifolium	0	0	0	0	0	0	0.0117647	0	0.654545	0.125
Myrtaceae	Syzygium	Syzygium grijsii	0	0	0	0	0	0	0	0	0.254545	0.075
Najadaceae	Najas	Najas minor	0	0.333333	0.0909091	0	0.342857	0.117647	0.0823529	0.292308	0.0181818	0
Nitrariaceae	Peganum	Nitraria sibirica	0	0.666667	0.145455	0.127273	0.142857	0	0	0	0	0
Nitrariaceae	Peganum	Peganum harmala	0	0.333333	0.0545455	0.109091	0	0	0	0	0	0
Nitrariaceae	Peganum	Peganum nigellastrum	0	0.333333	0.0181818	0.0727273	0	0	0.0117647	0	0	0
Nyctaginaceae	Bougainvillea	Bougainvillea spectabilis	0.111111	0	0	0.0909091	0	0	0	0.0769231	0.181818	0
Nymphaeaceae	Euryale	Euryale ferox	0.0555556	0.666667	0.0363636	0	0.157143	0.0823529	0.0705882	0.215385	0.290909	0.1
Nymphaeaceae	Nelumbo	Nelumbo nucifera	0.166667	0.333333	0.0363636	0.0909091	0	0.0705882	0.0588235	0.276923	0.472727	0.175
Nymphaeaceae	Nymphaea	Nymphaea alba	0	0	0	0	0	0.117647	0	0	0.0909091	0
Nymphaeaceae	Nymphaea	Nymphaea tetragona	0.111111	0.333333	0.0545455	0	0	0.129412	0	0.184615	0.127273	0.0375
Nyssaceae	Camptotheca	Camptotheca acuminata	0	0	0	0	0	0.0588235	0.0588235	0.153846	0.218182	0.225
Nyssaceae	Nyssa	Nyssa sinensis	0	0	0	0	0	0.0705882	0.0117647	0.0923077	0.6	0.15
Olacaceae	Schoepfia	Schoepfia jasminodora	0	0	0	0.0181818	0	0	0.0235294	0.0153846	0.818182	0.2375
Oleaceae	Forsythia	Forsythia viridissima	0.111111	0	0.0727273	0	0.3	0.141176	0.0705882	0.184615	0.690909	0.175
Oleaceae	Fraxinus	Fraxinus insularis	0	0	0	0	0.0714286	0	0.0117647	0.0153846	0.436364	0.1875
Oleaceae	Fraxinus	Fraxinus odontocalyx	0.0555556	0	0	0.0181818	0	0	0.117647	0.107692	0.163636	0.0875
Oleaceae	Jasminum	Jasminum sambac	0.111111	0	0	0	0	0.0588235	0	0.230769	0.0909091	0
Oleaceae	Ligustrum	Ligustrum lucidum	0.0555556	0.0666667	0.0363636	0.0181818	0	0.2	0.447059	0.692308	0.690909	0.5375
Oleaceae	Ligustrum	Ligustrum quihoui	0.166667	0.333333	0.0727273	0.109091	0	0.247059	0.411765	0.507692	0.381818	0.1875
Oleaceae	Ligustrum	Ligustrum sinense	0	0	0	0	0	0.0588235	0.0705882	0.261538	0.527273	0.1
Oleaceae	Ligustrum	Ligustrum leucanthum	0	0	0	0	0	0	0.0117647	0	0.0545455	0.1
Oleaceae	Ligustrum	Ligustrum obtusifolium	0.0555556	0	0	0	0.457143	0.176471	0.141176	0.0769231	0.0727273	0.0125
Oleaceae	Osmanthus	Osmanthus cooperi	0	0	0	0	0	0	0	0.0923077	0.272727	0.1125
Oleaceae	Osmanthus	Osmanthus marginatus	0	0	0	0	0	0	0	0	0.0909091	0.025
Oleaceae	Osmanthus	Osmanthus matsumuranus	0	0	0	0	0	0	0	0	0.309091	0.0125
Oleaceae	Fraxinus	Fraxinus bungeana	0.444444	0.666667	0.309091	0.163636	0.128571	0.0705882	0.117647	0	0	0.0125
Oleaceae	Fraxinus	Fraxinus mandshurica	0	0	0	0.0363636	0.114286	0.0588235	0.0352941	0	0	0
Oleaceae	Jasminum	Jasminum floridum	0.0555556	0.333333	0	0.0909091	0.0714286	0.635294	0.152941	0.153846	0.0909091	0.0625
Oleaceae	Syringa	Syringa pubescens	0.388889	0.333333	0.363636	0.454545	0.142857	0.0705882	0.0823529	0	0.0909091	0
Oleaceae	Syringa	Syringa villosa	0.277778	0.333333	0.345455	0.2	0.214286	0	0	0	0	0
Onagraceae	Circaea	Circaea alpina	0.111111	0.333333	0.127273	0.236364	0.0285714	0.0588235	0.0235294	0	0	0.025
Onagraceae	Circaea	Circaea cordata	0.222222	0.666667	0.309091	0.545455	0.271429	0.0705882	0.258824	0	0.145455	0.1125
Onagraceae	Circaea	Circaea erubescens	0	0	0	0.0181818	0	0	0.0588235	0	0.0545455	0.1375
Onagraceae	Circaea	Circaea mollis	0	0	0.109091	0	0.0857143	0.0588235	0.0588235	0.0923077	0.254545	0.0875
Onagraceae	Epilobium	Epilobium amurense	0.111111	0	0.0727273	0.181818	0	0	0.0352941	0	0	0
Onagraceae	Epilobium	Epilobium fastigiatoramosum	0.0555556	0.333333	0.163636	0.181818	0.285714	0.0588235	0.0117647	0	0	0
Onagraceae	Epilobium	Epilobium hirsutum	0.388889	0.666667	0.363636	0.690909	0.142857	0.294118	0.341176	0	0.0545455	0.075
Onagraceae	Epilobium	Epilobium minutiflorum	0.0555556	0.333333	0.0909091	0.0727273	0.0142857	0	0	0	0	0
Onagraceae	Epilobium	Epilobium palustre	0.333333	0.333333	0.254545	0.236364	0.171429	0	0.0823529	0	0	0
Onagraceae	Epilobium	Epilobium parviflorum	0.0555556	0.333333	0.127273	0.345455	0	0	0.235294	0	0	0.0625
Onagraceae	Epilobium	Epilobium platystigmatosum	0	0.333333	0.0727273	0	0	0	0.0352941	0	0	0
Onagraceae	Epilobium	Epilobium pyrricholophum	0	0	0.0545455	0.0545455	0	0.0117647	0.152941	0.0769231	0.0909091	0.1875
Onagraceae	Gaura	Gaura lindheimeri	0	0.333333	0.0181818	0	0	0.117647	0	0.0769231	0	0.0625
Onagraceae	Gaura	Gaura parviflora	0.0555556	0	0.0181818	0	0.0714286	0.364706	0.282353	0.2	0	0.1875
Onagraceae	Ludwigia	Ludwigia epilobioides	0	0.333333	0.0363636	0	0	0.0117647	0.0352941	0.492308	0.254545	0.1125
Onagraceae	Ludwigia	Ludwigia ovalis	0.0555556	0	0	0	0	0	0	0.0923077	0.2	0.0125
Orchidaceae	Amitostigma	Ponerorchis gracilis	0	0	0	0	0.0142857	0.0941176	0.211765	0.0153846	0.145455	0.25
Orchidaceae	Bletilla	Bletilla striata	0.0555556	0	0	0	0	0	0.105882	0.184615	0.345455	0.0875
Orchidaceae	Calanthe	Calanthe reflexa	0	0	0	0	0	0	0	0	0.0545455	0.0625
Orchidaceae	Cephalanthera	Cephalanthera erecta	0	0	0	0.0181818	0	0	0.0117647	0	0.0181818	0.0125
Orchidaceae	Cephalanthera	Cephalanthera falcata	0	0	0	0	0	0	0.0705882	0.107692	0.181818	0.1125
Orchidaceae	Cephalanthera	Cephalanthera longifolia	0	0	0	0.109091	0	0	0.0588235	0	0	0.0125
Orchidaceae	Changnienia	Changnienia amoena	0	0	0	0	0	0	0.0705882	0.0769231	0.0181818	0.0125
Orchidaceae	Cleisostoma	Cleisostoma scolopendrifolium	0	0.333333	0.0181818	0	0	0.0588235	0	0.0923077	0.163636	0.0125
Orchidaceae	Coeloglossum	Dactylorhiza viridis	0.166667	0.333333	0.254545	0.218182	0.0714286	0	0.0705882	0	0	0
Orchidaceae	Conchidium	Conchidium reptans	0	0	0	0	0	0	0	0	0.0181818	0.0125
Orchidaceae	Cymbidium	Cymbidium ensifolium	0	0	0	0	0	0	0	0.0769231	0.127273	0.0125
Orchidaceae	Cypripedium	Cypripedium franchetii	0	0	0	0.0909091	0	0	0.164706	0	0	0
Orchidaceae	Cypripedium	Cypripedium guttatum	0.166667	0.333333	0.254545	0.236364	0	0.0588235	0	0	0	0
Orchidaceae	Cypripedium	Cypripedium japonicum	0	0	0	0	0	0	0.0705882	0	0.218182	0.0875
Orchidaceae	Dendrobium	Dendrobium moniliforme	0	0	0	0	0	0	0	0	0.145455	0.0125
Orchidaceae	Dendrobium	Dendrobium officinale	0	0	0	0	0	0	0.0588235	0	0.0181818	0.0125
Orchidaceae	Epipactis	Epipactis helleborine	0.111111	0.333333	0.0909091	0.109091	0.0857143	0.0588235	0.0705882	0	0	0
Orchidaceae	Galeola	Galeola lindleyana	0	0	0	0	0	0	0.0235294	0	0	0.075
Orchidaceae	Goodyera	Goodyera biflora	0	0	0	0	0	0	0	0.0153846	0.127273	0.075
Orchidaceae	Goodyera	Goodyera repens	0	0	0.0181818	0.145455	0	0	0.105882	0	0	0.0625
Orchidaceae	Goodyera	Goodyera schlechtendaliana	0	0	0	0.0363636	0	0	0.0705882	0.0153846	0.636364	0.1
Orchidaceae	Gymnadenia	Gymnadenia conopsea	0.166667	0.333333	0.327273	0.381818	0.114286	0	0.0117647	0	0	0
Orchidaceae	Habenaria	Habenaria dentata	0	0	0	0	0	0	0.0117647	0	0.381818	0.0625
Orchidaceae	Habenaria	Habenaria linearifolia	0	0.333333	0.0363636	0	0	0.0823529	0	0.246154	0.236364	0.0125
Orchidaceae	Habenaria	Habenaria schindleri	0	0.333333	0	0	0.0857143	0	0	0	0.0363636	0.0125
Orchidaceae	Herminium	Herminium alaschanicum	0	0.333333	0.0727273	0.145455	0	0	0	0	0	0
Orchidaceae	Herminium	Herminium lanceum	0	0	0	0	0	0	0.0470588	0	0.0545455	0
Orchidaceae	Herminium	Herminium monorchis	0.277778	0.333333	0.363636	0.490909	0.157143	0.117647	0.0117647	0.0769231	0	0
Orchidaceae	Liparis	Liparis campylostalix	0.0555556	0.333333	0.109091	0.0545455	0.128571	0.176471	0.0235294	0	0	0.025
Orchidaceae	Malaxis	Malaxis monophyllos	0.0555556	0.333333	0.145455	0.0909091	0	0	0.0235294	0	0	0
Orchidaceae	Neottia	Neottia acuminata	0.111111	0	0.0181818	0.0181818	0	0	0.0117647	0	0	0
Orchidaceae	Neottia	Neottia camtschatea	0.111111	0.333333	0.0363636	0.0181818	0	0	0	0	0	0
Orchidaceae	Neottianthe	Neottianthe cucullata	0.277778	0.666667	0.309091	0.254545	0	0	0.0235294	0	0.0727273	0
Orchidaceae	Orchis	Orchis tschiliensis	0.0555556	0	0.0181818	0	0	0	0	0	0	0
Orchidaceae	Pelatantheria	Pelatantheria appendiculata	0	0	0	0.127273	0	0	0.0588235	0.0923077	0.0181818	0.0375
Orchidaceae	Peristylus	Peristylus calcaratus	0	0	0	0	0	0	0	0.0153846	0.127273	0
Orchidaceae	Platanthera	Platanthera bifolia	0.0555556	0.333333	0.0727273	0.0545455	0	0.0588235	0	0	0	0
Orchidaceae	Platanthera	Platanthera hologlottis	0	0	0	0	0	0.0823529	0	0	0.109091	0.0125
Orchidaceae	Platanthera	Platanthera japonica	0	0	0.109091	0	0	0	0.0705882	0	0.109091	0.025
Orchidaceae	Platanthera	Platanthera minor	0	0	0	0	0	0	0.0588235	0.0153846	0.345455	0.025
Orchidaceae	Platanthera	Platanthera chlorantha	0.222222	0	0.127273	0.272727	0.171429	0	0	0	0	0
Orchidaceae	Platanthera	Platanthera ussuriensis	0.111111	0	0.0545455	0.0181818	0	0	0	0.0153846	0.290909	0.025
Orchidaceae	Pogonia	Pogonia japonica	0	0	0	0	0	0.0705882	0	0.0923077	0.163636	0
Orchidaceae	Tulotis	Platanthera souliei	0	0	0.0363636	0	0.242857	0	0	0	0	0
Orobanchaceae	Aeginetia	Aeginetia indica	0	0	0	0	0	0	0	0.215385	0.6	0.1875
Orobanchaceae	Centranthera	Centranthera cochinchinensis	0	0	0	0	0	0.0588235	0	0.276923	0.109091	0.2
Orobanchaceae	Cymbaria	Cymbaria mongolica	0	0	0.145455	0.309091	0.0142857	0	0	0	0	0
Orobanchaceae	Euphrasia	Euphrasia pectinata	0.166667	0.333333	0.145455	0.4	0	0	0	0	0	0
Orobanchaceae	Euphrasia	Euphrasia regelii	0.111111	0.333333	0.0727273	0.2	0	0	0.0117647	0	0	0
Orobanchaceae	Monochasma	Monochasma sheareri	0	0	0	0	0	0	0.0117647	0.230769	0.2	0.1125
Orobanchaceae	Omphalotrix	Omphalotrix longipes	0.0555556	0	0.0545455	0	0	0	0	0	0.0181818	0
Orobanchaceae	Orobanche	Orobanche cernua	0	0.333333	0.127273	0.309091	0	0	0	0	0	0
Orobanchaceae	Orobanche	Orobanche coerulescens	0.333333	0.666667	0.345455	0.545455	0.185714	0.2	0.164706	0.0923077	0.0181818	0
Orobanchaceae	Orobanche	Orobanche ombrochares	0	0	0.0181818	0.0181818	0.0142857	0	0	0	0	0
Orobanchaceae	Orobanche	Orobanche pycnostachya	0.333333	0.333333	0.436364	0.254545	0.242857	0.0588235	0.0117647	0	0	0
Orobanchaceae	Orobanche	Orobanche sinensis	0	0	0	0	0	0	0	0	0.163636	0.1
Orobanchaceae	Pedicularis	Pedicularis chinensis	0.0555556	0.333333	0.127273	0.127273	0	0	0	0	0	0
Orobanchaceae	Pedicularis	Pedicularis muscicola	0	0	0.0181818	0.254545	0	0	0.0117647	0	0	0
Orobanchaceae	Pedicularis	Pedicularis resupinata	0.333333	0.333333	0.327273	0.254545	0.357143	0.141176	0.0705882	0	0.0363636	0.0875
Orobanchaceae	Pedicularis	Pedicularis shansiensis	0	0	0	0.127273	0	0	0.176471	0	0	0
Orobanchaceae	Pedicularis	Pedicularis spicata	0.277778	0.333333	0.4	0.472727	0	0	0.164706	0	0.0909091	0
Orobanchaceae	Pedicularis	Pedicularis striata	0.333333	0.333333	0.454545	1	0.0142857	0	0.0823529	0	0	0
Orobanchaceae	Pedicularis	Pedicularis verticillata	0.166667	0.333333	0.254545	0.254545	0	0	0	0	0	0
Orobanchaceae	Pedicularis	Pedicularis artselaeri	0.333333	0.333333	0.127273	0.163636	0	0	0.117647	0	0	0
Orobanchaceae	Pedicularis	Pedicularis henryi	0	0	0	0	0	0	0.0705882	0	0.0363636	0
Orobanchaceae	Pedicularis	Pedicularis rhinanthoides	0	0.333333	0.0181818	0.0363636	0	0	0	0	0	0
Orobanchaceae	Pedicularis	Pedicularis tatarinowii	0.111111	0.333333	0.109091	0.290909	0	0	0	0	0	0
Orobanchaceae	Rehmannia	Rehmannia chingii	0.111111	0	0.0181818	0.0181818	0	0	0	0.0769231	0.545455	0.1625
Orobanchaceae	Siphonostegia	Siphonostegia laeta	0	0	0	0	0	0	0.0117647	0.276923	0.509091	0.175
Orobanchaceae	Sopubia	Sopubia matsumurae	0	0	0	0	0	0	0	0.0923077	0.0909091	0.075
Oxalidaceae	Oxalis	Oxalis bowiei	0	0	0	0	0	0.0705882	0	0	0.272727	0
Oxalidaceae	Oxalis	Oxalis corymbosa	0	0.333333	0	0	0	0.0705882	0.0117647	0.153846	0.709091	0.2
Palmae	Trachycarpus	Trachycarpus fortunei	0	0	0	0	0	0	0	0.0769231	0.545455	0.025
Papaveraceae	Corydalis	Corydalis balansae	0	0	0	0.0181818	0	0.0352941	0	0.0769231	0.381818	0.075
Papaveraceae	Corydalis	Corydalis bungeana	0.388889	0.333333	0.181818	0.163636	0.185714	0.247059	0.0588235	0	0	0
Papaveraceae	Corydalis	Corydalis caudata	0.0555556	0.333333	0.163636	0.145455	0	0.152941	0.0588235	0.0923077	0	0
Papaveraceae	Corydalis	Corydalis decumbens	0	0	0	0	0	0	0	0.323077	0.4	0.025
Papaveraceae	Corydalis	Corydalis edulis	0.166667	0.333333	0.0181818	0.163636	0	0.0823529	0.258824	0.476923	0.127273	0.0125
Papaveraceae	Corydalis	Corydalis fangshanensis	0.111111	0.333333	0.0909091	0.109091	0	0	0.0117647	0	0	0
Papaveraceae	Corydalis	Corydalis gamosepala	0.222222	0.333333	0.0545455	0.0545455	0	0	0	0	0	0
Papaveraceae	Corydalis	Corydalis giraldii	0	0	0.0181818	0.0181818	0	0	0.0705882	0	0	0
Papaveraceae	Corydalis	Corydalis hsiaowutaishanensis	0	0	0.0181818	0.0363636	0	0	0	0	0	0
Papaveraceae	Corydalis	Corydalis incisa	0	0	0.0181818	0.0909091	0	0	0.164706	0.338462	0.472727	0.3125
Papaveraceae	Corydalis	Corydalis ophiocarpa	0.0555556	0	0.0545455	0.327273	0	0	0.0352941	0	0.0363636	0.175
Papaveraceae	Corydalis	Corydalis racemosa	0	0	0.0727273	0.163636	0	0	0.129412	0.261538	0.527273	0.2875
Papaveraceae	Corydalis	Corydalis raddeana	0.222222	0.333333	0.218182	0.0363636	0.271429	0.0823529	0.0470588	0	0.0181818	0
Papaveraceae	Corydalis	Corydalis shensiana	0	0	0	0.0727273	0	0	0.0117647	0	0	0
Papaveraceae	Corydalis	Corydalis speciosa	0.166667	0	0.0909091	0.0363636	0.0428571	0.0588235	0.0352941	0	0	0.0125
Papaveraceae	Corydalis	Corydalis wilfordii	0.222222	0	0.0181818	0.0181818	0	0	0	0	0	0.0625
Papaveraceae	Corydalis	Corydalis yanhusuo	0.0555556	0	0	0	0.0714286	0.352941	0.0117647	0.246154	0.127273	0.125
Papaveraceae	Dicranostigma	Dicranostigma leptopodum	0	0	0.163636	0.472727	0	0.0588235	0.235294	0	0	0
Papaveraceae	Eomecon	Eomecon chionantha	0	0	0	0	0	0	0	0	0.236364	0.075
Papaveraceae	Hylomecon	Hylomecon japonica	0	0	0	0.0181818	0	0	0.0117647	0	0	0.0125
Papaveraceae	Hypecoum	Hypecoum erectum	0.166667	0.333333	0.418182	0.509091	0	0.247059	0.2	0	0	0
Papaveraceae	Hypecoum	Hypecoum leptocarpum	0.111111	0.333333	0.127273	0.218182	0	0	0	0	0	0
Papaveraceae	Macleaya	Macleaya cordata	0	0	0	0.254545	0	0.117647	0.2	0	0	0
Paulowniaceae	Paulownia	Paulownia catalpifolia	0.0555556	0.333333	0.0727273	0	0.0714286	0.258824	0.0117647	0	0.0181818	0
Paulowniaceae	Paulownia	Paulownia elongata	0.0555556	0	0.0363636	0.127273	0.0714286	0.0588235	0.141176	0.0769231	0	0
Paulowniaceae	Paulownia	Paulownia fortunei	0	0.333333	0	0.109091	0	0.0705882	0	0.0769231	0.218182	0.225
Paulowniaceae	Paulownia	Paulownia tomentosa	0.222222	0	0.0363636	0.0909091	0.0857143	0.247059	0.2	0.153846	0.236364	0.0875
Pedaliaceae	Trapella	Trapella sinensis	0.111111	0.333333	0.0363636	0	0.142857	0.0117647	0.0117647	0.0923077	0.218182	0.1
Pentaphylacaceae	Eurya	Eurya brevistyla	0	0	0	0	0	0	0.0588235	0	0.0909091	0.025
Phrymaceae	Mimulus	Mimulus tenella	0.333333	0.666667	0.2	0.0545455	0.128571	0.0588235	0.105882	0	0	0.075
Phyllanthaceae	Antidesma	Antidesma javanica	0.0555556	0	0	0	0	0	0.0705882	0.153846	0.109091	0
Phyllanthaceae	Antidesma	Antidesma japonicum	0	0	0	0	0	0.0125	0.0117647	0	0.436364	0.0125
Phyllanthaceae	Bischofia	Bischofia polycarpa	0	0	0	0	0	0.0588235	0.211765	0.153846	0.345455	0.1
Phyllanthaceae	Flueggea	Flueggea virosa	0	0	0.0181818	0	0.142857	0.470588	0	0.0153846	0	0
Phyllanthaceae	Glochidion	Glochidion puberum	0.0555556	0	0	0	0.0142857	0.0705882	0.188235	0.723077	1	0.5625
Phyllanthaceae	Glochidion	Glochidion wilsonii	0	0	0	0	0	0	0.0823529	0.0769231	0.309091	0.1875
Phyllanthaceae	Phyllanthus	Phyllanthus chekiangensis	0	0	0	0	0	0	0	0	0.254545	0.0125
Phyllanthaceae	Phyllanthus	Phyllanthus flexuosus	0	0	0	0	0	0	0.141176	0.0923077	0.527273	0.2125
Phyllanthaceae	Phyllanthus	Phyllanthus glaucus	0	0	0	0	0	0	0	0.107692	0.818182	0.3375
Phyllanthaceae	Phyllanthus	Phyllanthus urinaria	0	0	0.0363636	0.0181818	0.0142857	0.0823529	0.0823529	0.246154	0.672727	0.3375
Phyllanthaceae	Phyllanthus	Phyllanthus ussuriensis	0.0555556	0	0.0363636	0	0.285714	0.247059	0.0588235	0.569231	0.509091	0.1
Phytolaccaceae	Phytolacca	Phytolacca americana	0.0555556	0	0.0181818	0	0.157143	0.4	0.235294	0.938462	1	0.975
Phytolaccaceae	Phytolacca	Phytolacca japonica	0	0	0	0	0	0.0588235	0	0	0.127273	0.0875
Pinaceae	Abies	Abies nephrolepis	0	0.333333	0.0363636	0.0363636	0.228571	0	0	0	0	0
Pinaceae	Cedrus	Cedrus deodara	0.0555556	0	0.0181818	0.0909091	0.0714286	0.247059	0.129412	0.153846	0.0909091	0
Pinaceae	Larix	Larix gmelinii	0.111111	0	0.0545455	0.0727273	0	0.117647	0.0117647	0	0	0
Pinaceae	Larix	Larix kaempferi	0.0555556	0	0.0545455	0	0.342857	0.247059	0.0588235	0	0.0909091	0
Pinaceae	Picea	Picea meyeri	0.166667	0.333333	0.254545	0.290909	0.0142857	0.0823529	0.0588235	0	0	0
Pinaceae	Picea	Picea neoveitchii	0	0.333333	0.0181818	0.109091	0	0	0.0117647	0	0	0
Pinaceae	Picea	Picea wilsonii	0.166667	0.333333	0.254545	0.327273	0	0.0117647	0	0	0	0
Pinaceae	Pinus	Pinus ponderosa	0	0	0	0	0.0857143	0	0	0.0769231	0	0
Pinaceae	Abies	Abies firma	0	0	0	0	0.0142857	0.117647	0.0588235	0.0769231	0.0909091	0
Pinaceae	Pinus	Pinus banksiana	0	0	0	0	0.214286	0.282353	0	0	0.0909091	0
Pinaceae	Pinus	Pinus elliottii	0	0	0	0	0	0.0117647	0.0588235	0.0923077	0	0
Pinaceae	Pinus	Pinus hwangshanensis	0.0555556	0	0	0	0	0.0823529	0.0235294	0.0923077	0.363636	0.2625
Pinaceae	Pinus	Pinus massoniana	0	0	0	0	0	0.129412	0.235294	0.507692	0.836364	0.3875
Pinaceae	Pinus	Pinus palustris	0	0	0	0	0	0.0588235	0	0.0769231	0.0909091	0
Pinaceae	Pinus	Pinus strobus	0	0	0	0	0.142857	0.0588235	0	0.0769231	0	0
Pinaceae	Pinus	Pinus taeda	0	0	0.0181818	0.0181818	0	0.223529	0.0588235	0.153846	0.0909091	0
Pinaceae	Pinus	Pinus thunbergii	0	0	0.0545455	0.0181818	0.1	0.376471	0.0823529	0.384615	0.309091	0.0625
Pinaceae	Pseudolarix	Pseudolarix amabilis	0	0	0	0.0909091	0	0.0705882	0.0117647	0.0923077	0.290909	0.0375
Pinaceae	Pseudotsuga	Pseudotsuga sinensis	0	0	0	0	0	0	0	0.0769231	0.127273	0.0625
Pinaceae	Tsuga	Tsuga chinensis	0	0	0	0	0	0.0588235	0.0705882	0.0769231	0.0363636	0.0875
Pittosporaceae	Pittosporum	Pittosporum illicioides	0	0	0	0	0.0142857	0	0.0235294	0.138462	0.890909	0.325
Pittosporaceae	Pittosporum	Pittosporum tobira	0.111111	0.333333	0	0.0181818	0	0.517647	0.176471	0.507692	0.527273	0.0375
Plantaginaceae	Digitalis	Digitalis purpurea	0	0.333333	0	0.109091	0.0714286	0	0	0.0769231	0.0909091	0.025
Plantaginaceae	Limnophila	Limnophila sessiliflora	0	0.333333	0	0	0.0714286	0	0.0705882	0.2	0.454545	0.025
Plantaginaceae	Linaria	Linaria vulgaris	0.111111	0.333333	0.272727	0.218182	0.171429	0.152941	0.141176	0.0923077	0	0
Plantaginaceae	Veronica	Veronica anagallis-aquatica	0.0555556	0	0.0181818	0	0	0.470588	0	0	0	0
Plantaginaceae	Veronica	Veronica arvensis	0	0	0	0	0	0.129412	0.0588235	0.476923	0.909091	0.8625
Plantaginaceae	Veronica	Veronica peregrina	0	0	0	0.0909091	0	0.0823529	0	0.569231	0.963636	0.825
Plantaginaceae	Veronica	Veronica persica	0.111111	0	0.0181818	0	0	0.282353	0.0705882	0.969231	1	1
Plantaginaceae	Veronica	Veronica rockii	0.0555556	0.333333	0.0363636	0.0909091	0	0	0.0235294	0	0	0
Plantaginaceae	Veronicastrum	Veronicastrum axillare	0	0	0	0	0	0	0	0.107692	0.563636	0.1125
Plantaginaceae	Veronicastrum	Veronicastrum sibiricum	0.333333	0.333333	0.254545	0.327273	0.485714	0.164706	0	0	0	0
Plantaginaceae	Veronicastrum	Veronicastrum villosulum	0	0	0	0	0	0	0	0	0.0909091	0.2125
Plantaginaceae	Plantago	Plantago virginica	0	0	0.0181818	0	0	0.0588235	0	0.476923	0.454545	0.6625
Platanaceae	Platanus	Platanus occidentalis	0.0555556	0	0.0181818	0	0.0714286	0.317647	0.0705882	0.0769231	0	0
Plumbaginaceae	Ceratostigma	Ceratostigma plumbaginoides	0	0	0	0.109091	0	0	0.141176	0.0769231	0	0
Plumbaginaceae	Limonium	Limonium bicolor	0.111111	1	0.509091	0.763636	0.0285714	0.0823529	0.176471	0	0	0
Plumbaginaceae	Limonium	Limonium sinense	0.0555556	0.666667	0.109091	0.0181818	0.2	0.235294	0.129412	0.276923	0.2	0
Poaceae	Achnatherum	Achnatherum pubicalyx	0	0.333333	0.0181818	0	0.0714286	0	0	0	0	0
Poaceae	Achnatherum	Achnatherum sibiricum	0.222222	0.333333	0.272727	0.381818	0.385714	0.0117647	0.0352941	0	0	0
Poaceae	Achnatherum	Achnatherum splendens	0.0555556	0.333333	0.2	0.290909	0.0714286	0	0	0	0	0
Poaceae	Achnatherum	Achnatherum coreanum	0.0555556	0	0	0	0	0	0.0235294	0.0923077	0.0181818	0
Poaceae	Achnatherum	Achnatherum helanshanense	0	0.333333	0	0.309091	0	0	0	0	0	0
Poaceae	Aeluropus	Aeluropus sinensis	0	0.666667	0	0.109091	0.157143	0.247059	0.0588235	0.0769231	0	0
Poaceae	Agrostis	Agrostis clavata	0.0555556	0.333333	0.0909091	0.0363636	0.428571	0.176471	0.0117647	0	0.0909091	0.1375
Poaceae	Agrostis	Agrostis gigantea	0.166667	0.333333	0.145455	0.127273	0	0.0823529	0	0.0769231	0.127273	0.0125
Poaceae	Agrostis	Agrostis stolonifera	0.0555556	0	0.0363636	0.236364	0.0285714	0	0	0.0769231	0	0
Poaceae	Agrostis	Agrostis matsumurae	0	0	0	0	0.0857143	0.117647	0.0117647	0.0769231	0.2	0.0625
Poaceae	Alopecurus	Alopecurus japonicus	0	0	0	0	0	0.0588235	0.0705882	0.169231	0.181818	0.1875
Poaceae	Aristida	Aristida adscensionis	0.166667	0.666667	0.2	0.436364	0.228571	0.211765	0.211765	0.0153846	0.0181818	0
Poaceae	Arundinella	Arundinella setosa	0	0	0	0	0	0	0.0352941	0.246154	0.327273	0.0875
Poaceae	Arundinella	Arundinella hirta	0.5	0.666667	0.309091	0	0.628571	0.223529	0.141176	0.415385	0.454545	0.1375
Poaceae	Arundo	Arundo donax	0	0.333333	0	0	0	0.0705882	0	0.153846	0.2	0
Poaceae	Avena	Avena chinensis	0.111111	0.333333	0.2	0.0727273	0	0	0	0	0	0
Poaceae	Avena	Avena sativa	0.0555556	0.4	0.0545455	0.127273	0	0.0941176	0	0.0769231	0	0
Poaceae	Brachiaria	Brachiaria villosa	0	0	0	0	0	0	0.0117647	0	0.345455	0.1875
Poaceae	Brachypodium	Brachypodium pinnatum	0	0	0.0181818	0.0181818	0	0	0	0	0	0
Poaceae	Brachypodium	Brachypodium sylvaticum	0	0.333333	0	0.0909091	0.0142857	0	0.0941176	0.0769231	0.109091	0.025
Poaceae	Bromus	Bromus catharticus	0.0555556	0.333333	0	0	0.0714286	0.0588235	0	0.0769231	0.472727	0.0625
Poaceae	Bromus	Bromus inermis	0.222222	0.333333	0.145455	0.0909091	0.242857	0.0588235	0.0117647	0	0.0909091	0.025
Poaceae	Bromus	Bromus japonicus	0.0555556	0	0.0181818	0.218182	0.242857	0.6	0.364706	0.307692	0.363636	0.45
Poaceae	Bromus	Bromus remotiflorus	0	0	0	0	0.0142857	0.0588235	0.0823529	0.169231	0.472727	0.175
Poaceae	Calamagrostis	Calamagrostis macrolepis	0.222222	0.333333	0.0909091	0.127273	0.271429	0.0705882	0	0	0	0
Poaceae	Calamagrostis	Calamagrostis pseudophragmites	0.166667	0.333333	0.272727	0.636364	0.328571	1	0.188235	0.0769231	0	0
Poaceae	Calamagrostis	Capillipedium assimile	0	0	0	0	0	0.0705882	0	0	0.109091	0
Poaceae	Chimonobambusa	Chimonobambusa quadrangularis	0	0	0	0	0	0	0	0	0.109091	0.0625
Poaceae	Chrysopogon	Chrysopogon zizanioides	0	0	0.0181818	0	0	0	0	0	0.0181818	0
Poaceae	Cleistogenes	Cleistogenes caespitosa	0.222222	0.333333	0.218182	0.363636	0.157143	0.270588	0	0	0	0
Poaceae	Cleistogenes	Cleistogenes hackelii	0.222222	0.333333	0.181818	0.0909091	0.142857	0.164706	0.0705882	0	0	0
Poaceae	Cleistogenes	Cleistogenes hancei	0	0	0	0	0	0.294118	0.0117647	0	0	0
Poaceae	Cleistogenes	Cleistogenes polyphylla	0.0555556	0.666667	0.2	0.0909091	0.471429	0.235294	0.0117647	0	0	0
Poaceae	Cleistogenes	Cleistogenes serotina	0.222222	0.666667	0.0545455	0.0727273	0.257143	0.117647	0.0823529	0.153846	0	0.075
Poaceae	Cleistogenes	Cleistogenes squarrosa	0.0555556	0	0.145455	0.2	0.157143	0.0588235	0.141176	0	0	0
Poaceae	Cleistogenes	Cleistogenes hackelii	0	0	0	0	0.142857	0.129412	0.0117647	0.0769231	0	0
Poaceae	Cortaderia	Cortaderia selloana	0	0	0	0	0	0.0588235	0	0.0769231	0	0
Poaceae	Crypsis	Crypsis aculeata	0.166667	0.666667	0.0909091	0.2	0.1	0.0588235	0.0823529	0.0769231	0	0
Poaceae	Crypsis	Crypsis schoenoides	0.0555556	0	0.0545455	0	0	0.0588235	0.0117647	0.0153846	0	0.075
Poaceae	Cymbopogon	Cymbopogon goeringii	0	0	0.0181818	0	0.0714286	0.482353	0.129412	0.369231	0.218182	0.225
Poaceae	Cynodon	Cynodon dactylon	0	0.4	0.163636	0.254545	0	0.305882	0.447059	0.323077	0.2	0.15
Poaceae	Dactylis	Dactylis glomerata	0.111111	0.333333	0.0181818	0	0	0.129412	0.0588235	0.0769231	0.0909091	0
Poaceae	Deyeuxia	Deyeuxia anthoxanthoides	0.0555556	0.333333	0.0181818	0.0181818	0	0	0	0	0	0
Poaceae	Deyeuxia	Deyeuxia effusiflora	0	0	0	0	0	0	0.0352941	0	0.0363636	0
Poaceae	Deyeuxia	Deyeuxia hakonensis	0	0	0	0	0	0	0	0	0.0181818	0.0625
Poaceae	Deyeuxia	Deyeuxia purpurea	0.111111	0.333333	0.0909091	0.0545455	0.0714286	0.0117647	0	0	0	0
Poaceae	Deyeuxia	Deyeuxia arundinacea var. hirsuta	0	0.333333	0.0363636	0	0.1	0.141176	0.0117647	0	0	0
Poaceae	Deyeuxia	Deyeuxia arundinacea var. robusta	0	0	0	0	0	0.2	0	0	0	0.125
Poaceae	Diarrhena	Diarrhena mandshurica	0	0.333333	0.0727273	0.0181818	0.3	0.0588235	0.0352941	0	0	0
Poaceae	Digitaria	Digitaria radicosa	0	0	0	0	0	0	0	0	0.0909091	0.075
Poaceae	Digitaria	Digitaria violascens	0	0	0.0545455	0.0727273	0	0.470588	0.129412	0.261538	0.327273	0.2125
Poaceae	Digitaria	Digitaria ciliaris	0	0.333333	0.0181818	0.0727273	0.157143	0.0705882	0.0705882	0.0769231	0.127273	0
Poaceae	Digitaria	Digitaria ornithopoda	0	0	0	0	0	0.0117647	0	0	0.0181818	0.0625
Poaceae	Echinochloa	Echinochloa caudata	0.111111	0	0	0.181818	0.142857	0.270588	0	0.169231	0.0909091	0.0625
Poaceae	Echinochloa	Echinochloa colona	0	0.333333	0.0545455	0.0909091	0	0.0588235	0.141176	0.4	0.218182	0.0375
Poaceae	Echinochloa	Echinochloa crus-galli	0	0	0	0.0363636	0	0	0.117647	0.0153846	0	0.025
Poaceae	Echinochloa	Echinochloa frumentacea	0	0	0.0181818	0	0.0714286	0	0	0	0	0
Poaceae	Echinochloa	Echinochloa glabrescens	0	0	0.0181818	0	0	0	0.0588235	0.0153846	0	0.0125
Poaceae	Echinochloa	Echinochloa oryzoides	0	0	0.0363636	0	0	0	0.0588235	0	0	0.025
Poaceae	Echinochloa	Echinochloa crus-galli var. mitis	0	0	0.0181818	0.0181818	0	1	0.0235294	0.0307692	0.109091	0
Poaceae	Echinochloa	Echinochloa crus-galli var. zelayensis	0	0	0	0	0	1	0	0.0307692	0.0909091	0
Poaceae	Eleusine	Eleusine coracana	0.0555556	0	0	0	0	0.0588235	0.0117647	0.0153846	0.0909091	0.0375
Poaceae	Elymus	Elymus dahuricus	0.222222	0.333333	0.290909	0.618182	0.471429	0.0588235	0.117647	0	0	0
Poaceae	Elymus	Elymus excelsus	0	0.333333	0.109091	0.181818	0.242857	0	0.0117647	0	0	0
Poaceae	Elymus	Elymus nutans	0.0555556	0	0.0181818	0.0363636	0	0.0588235	0	0	0	0
Poaceae	Elymus	Elymus sibiricus	0.222222	0.333333	0.345455	0.2	0.0857143	0	0.0352941	0	0	0
Poaceae	Elymus	Elymus alienus	0	0	0.0363636	0.0363636	0	0	0	0	0	0
Poaceae	Elymus	Elymus ciliaris	0	0	0	0	0	1	0	0	0	0.075
Poaceae	Elymus	Elymus ciliaris var. hackelianus	0	0	0	0	0	0.0941176	0	0.0769231	0	0.025
Poaceae	Elymus	Elymus ciliaris var. lasiophyllus	0	0	0	0.0363636	0.1	0.0588235	0	0	0	0
Poaceae	Elymus	Elymus ciliaris var. submuticus	0	0.333333	0	0	0	0.0588235	0	0.0769231	0	0
Poaceae	Elymus	Elymus kamoji	0	0	0	0	0	1	0	0	0	0.075
Poaceae	Enneapogon	Enneapogon desvauxii	0	0	0.0909091	0	0.0142857	0	0	0	0	0
Poaceae	Eragrostis	Eragrostis autumnalis	0.111111	0	0.0545455	0.0181818	0.0714286	0.235294	0.0705882	0.169231	0.109091	0.0125
Poaceae	Eragrostis	Eragrostis japonica	0	0	0	0	0	0.129412	0.188235	0.0923077	0.272727	0.275
Poaceae	Eremochloa	Eremochloa ophiuroides	0	0	0	0	0	0	0.105882	0.230769	0.454545	0.025
Poaceae	Eriochloa	Eriochloa villosa	0.277778	0.666667	0.218182	0	0.5	0.423529	0.211765	0.369231	0.509091	0.575
Poaceae	Eulalia	Eulalia quadrinervis	0	0	0	0	0	0	0	0	0.272727	0.0875
Poaceae	Eulalia	Eulalia speciosa	0	0	0	0	0	0.0588235	0.0235294	0.169231	0.0363636	0.15
Poaceae	Festuca	Festuca extremiorientalis	0.0555556	0.333333	0.0727273	0.0181818	0.214286	0.176471	0.0235294	0	0	0.0125
Poaceae	Festuca	Festuca japonica	0	0	0	0	0	0	0.0117647	0	0	0.0125
Poaceae	Festuca	Festuca ovina	0.0555556	0	0.0545455	0.0545455	0	0.188235	0.0705882	0	0.0909091	0.0875
Poaceae	Festuca	Festuca parvigluma	0	0	0	0	0	0.0588235	0.0117647	0.153846	0.163636	0.175
Poaceae	Festuca	Festuca sibirica	0.0555556	0.333333	0.0363636	0.0181818	0	0	0	0	0	0
Poaceae	Glyceria	Glyceria leptolepis	0	0	0	0	0.0857143	0.0117647	0.105882	0	0.0181818	0
Poaceae	Helictotrichon	Helictochloa hookeri	0.0555556	0.333333	0.0909091	0.0909091	0	0	0	0	0	0
Poaceae	Helictotrichon	Helictotrichon leianthum	0	0	0	0.163636	0	0	0.0117647	0	0	0
Poaceae	Heteropogon	Heteropogon contortus	0	0	0	0	0	0	0.117647	0	0.0909091	0
Poaceae	Hierochloe	Hierochloe odorata	0.0555556	0	0.0181818	0.0181818	0	0	0	0	0	0
Poaceae	Hordeum	Hordeum distichon	0.0555556	0	0	0	0	0	0.0117647	0	0.0909091	0.0625
Poaceae	Hordeum	Hordeum vulgare	0.166667	0.333333	0.0909091	0.0181818	0.0714286	0.117647	0.117647	0.384615	0.127273	0
Poaceae	Imperata	Imperata cylindrica	0	0	0	0	0.0142857	0	0.0588235	0.0923077	0	0
Poaceae	Indocalamus	Indocalamus latifolius	0	0	0	0	0	0.0117647	0.0588235	0.246154	0.4	0
Poaceae	Isachne	Isachne pulchella	0	0	0	0	0	1	0	0	0.0363636	0.0125
Poaceae	Ischaemum	Ischaemum aristatum	0	0	0	0	0	0	0	0.0769231	0.254545	0
Poaceae	Leersia	Leersia japonica	0	0	0.0727273	0	0	0.223529	0.0705882	0.0923077	0.127273	0.1375
Poaceae	Leersia	Leersia sayanuka	0	0	0	0	0	0.0823529	0	0.0769231	0.0545455	0.075
Poaceae	Leptochloa	Leptochloa chinensis	0.166667	0	0	0	0	0.152941	0.0117647	0.261538	0.272727	0.4
Poaceae	Leptochloa	Leptochloa fusca	0.111111	0.666667	0.145455	0	0.214286	0.2	0.0235294	0.184615	0	0.0625
Poaceae	Leptochloa	Leptochloa panicea	0.166667	0	0.0181818	0	0	0.0705882	0.105882	0.169231	0.272727	0.075
Poaceae	Leymus	Leymus chinensis	0.0555556	0.666667	0.309091	0.636364	0.342857	0.0117647	0	0.0769231	0	0
Poaceae	Leymus	Leymus secalinus	0	0.333333	0.272727	0.418182	0.242857	0	0	0	0.0181818	0
Poaceae	Lolium	Lolium multiflorum	0.0555556	0	0.0181818	0	0.0714286	0.235294	0.0588235	0.784615	0.290909	0.9125
Poaceae	Lolium	Lolium temulentum	0.0555556	0.0666667	0	0	0.0142857	0.0705882	0	0.0923077	0	0.075
Poaceae	Lophatherum	Lophatherum gracile	0.0555556	0	0	0.0181818	0	0.0588235	0.0705882	0.2	0.727273	0.2625
Poaceae	Lophatherum	Lophatherum sinense	0	0	0	0	0	0	0.0117647	0	0.0181818	0.075
Poaceae	Melica	Melica grandiflora	0	0	0	0	0.0714286	0.0823529	0	0.169231	0.145455	0.0125
Poaceae	Melica	Melica radula	0.333333	0.666667	0.127273	0.345455	0	0.282353	0.0588235	0	0	0
Poaceae	Melica	Melica scabrosa	0.388889	0.666667	0.236364	0.472727	0.328571	0.4	0.270588	0.0769231	0	0
Poaceae	Melica	Melica turczaninowiana	0.0555556	0	0	0.0181818	0	0	0	0	0	0
Poaceae	Melica	Melica virgata	0.0555556	0.333333	0.236364	0.181818	0	0	0	0	0	0
Poaceae	Microstegium	Microstegium japonicum	0	0	0	0	0	0	0	0	0.0181818	0.0625
Poaceae	Microstegium	Microstegium nudum	0	0	0	0	0	0	0.0352941	0.153846	0.145455	0.0625
Poaceae	Microstegium	Microstegium dilatatum	0.0555556	0	0	0	0	0.0941176	0	0.0769231	0	0
Poaceae	Microstegium	Microstegium vimineum	0.166667	0	0.0181818	0	0.0714286	0.470588	0.0235294	0.153846	0.0727273	0.1375
Poaceae	Milium	Milium effusum	0.0555556	0.333333	0.0363636	0.0181818	0.3	0	0.0470588	0	0.0363636	0.0375
Poaceae	Miscanthus	Miscanthus floridulus	0	0	0	0	0.0714286	0	0.129412	0.169231	0.454545	0.2125
Poaceae	Miscanthus	Miscanthus sacchariflorus	0	0	0.0363636	0	0.142857	0.0705882	0.117647	0	0	0
Poaceae	Miscanthus	Miscanthus sinensis	0	0.333333	0.0181818	0	0.285714	0.388235	0.282353	0.169231	0.4	0.2875
Poaceae	Molinia	Molinia japonica	0	0	0	0	0	0	0	0	0.0363636	0.0625
Poaceae	Muhlenbergia	Muhlenbergia huegelii	0.111111	0.333333	0.0909091	0.2	0.228571	0.0588235	0.0588235	0	0.0181818	0.0125
Poaceae	Muhlenbergia	Muhlenbergia japonica	0.0555556	0	0.0363636	0	0.4	0.0588235	0.0117647	0.246154	0.163636	0.0125
Poaceae	Muhlenbergia	Muhlenbergia ramosa	0	0	0	0	0	0.0705882	0	0.184615	0.127273	0.0625
Poaceae	Neyraudia	Neyraudia montana	0	0	0	0	0	0	0	0.0769231	0.345455	0.1625
Poaceae	Neyraudia	Neyraudia reynaudiana	0	0	0	0.0181818	0	0	0	0	0.254545	0.0125
Poaceae	Oplismenus	Oplismenus undulatifolius	0.277778	0.333333	0.127273	0.2	0	0.317647	0.317647	0.2	0.327273	0.3875
Poaceae	Panicum	Panicum bisulcatum	0.222222	0	0	0	0.228571	0.0823529	0.0588235	0.323077	0.636364	0.3375
Poaceae	Panicum	Panicum repens	0	0	0	0	0	0	0	0.0923077	0.0181818	0
Poaceae	Paspalum	Paspalum thunbergii	0	0	0	0	0	0.223529	0.164706	0.323077	0.4	0.1125
Poaceae	Paspalum	Paspalum artemisia	0	0	0	0	0	0	0	0.0769231	0.0181818	0.125
Poaceae	Paspalum	Paspalum scrobiculatum	0	0	0	0	0	0.129412	0	0	0.181818	0
Poaceae	Perotis	Perotis hordeiformis	0	0	0.0181818	0	0	0	0.0235294	0	0	0
Poaceae	Phacelurus	Phacelurus latifolius	0	0	0.0181818	0	0.0714286	0.0588235	0	0.2	0.181818	0
Poaceae	Phaenosperma	Phaenosperma globosum	0	0	0.0363636	0.0181818	0	0	0.0588235	0.0923077	0.309091	0.1875
Poaceae	Phleum	Phleum paniculatum	0.111111	0	0	0	0	0.0235294	0.164706	0.153846	0.0545455	0.075
Poaceae	Phleum	Phleum pratense	0.0555556	0.333333	0	0	0.157143	0.141176	0.0588235	0.230769	0	0.0125
Poaceae	Phyllostachys	Phyllostachys acuta	0	0	0	0	0	0	0	0	0.2	0.025
Poaceae	Phyllostachys	Phyllostachys angusta	0	0	0	0	0	0	0	0	0.127273	0.0125
Poaceae	Phyllostachys	Phyllostachys arcana	0	0	0	0	0	0	0	0.0769231	0.127273	0
Poaceae	Phyllostachys	Phyllostachys aureosulcata	0.0555556	0	0	0	0	0.0588235	0	0	0.109091	0
Poaceae	Phyllostachys	Phyllostachys edulis	0.0555556	0	0	0	0	0.270588	0.0117647	0.0153846	0.236364	0.0625
Poaceae	Phyllostachys	Phyllostachys flexuosa	0	0	0	0.0181818	0	0	0.0823529	0	0.109091	0
Poaceae	Phyllostachys	Phyllostachys glauca	0	0	0	0	0	0.0588235	0.117647	0.0769231	0.145455	0.0625
Poaceae	Phyllostachys	Phyllostachys heteroclada	0	0	0	0	0	0	0.0470588	0.0769231	0.181818	0.0375
Poaceae	Phyllostachys	Phyllostachys mannii	0	0	0	0	0	0	0.0352941	0.0769231	0.0545455	0
Poaceae	Phyllostachys	Phyllostachys nuda	0.0555556	0	0	0	0	0	0	0	0.236364	0
Poaceae	Phyllostachys	Phyllostachys propinqua	0.0555556	0	0	0	0	0	0.188235	0	0.254545	0
Poaceae	Phyllostachys	Phyllostachys rubicunda	0	0	0	0	0	0	0	0.0153846	0.0363636	0
Poaceae	Phyllostachys	Phyllostachys rubromarginata	0	0	0	0	0	0	0	0	0.127273	0.0125
Poaceae	Phyllostachys	Phyllostachys stimulosa	0	0	0	0	0	0	0	0	0.145455	0.0625
Poaceae	Phyllostachys	Phyllostachys sulphurea	0	0	0	0	0	0.0588235	0.0117647	0	0.127273	0
Poaceae	Phyllostachys	Phyllostachys varioauriculata	0	0	0	0	0	0	0	0	0.109091	0.0125
Poaceae	Phyllostachys	Phyllostachys viridiglaucescens	0	0	0	0	0	0	0	0.0923077	0.0909091	0
Poaceae	Phyllostachys	Phyllostachys vivax	0	0	0	0	0	0	0	0	0.218182	0.0125
Poaceae	Phyllostachys	Phyllostachys nigra	0.0555556	0	0	0	0	0	0.0588235	0	0.327273	0.075
Poaceae	Phyllostachys	Phyllostachys sulphurea	0.0555556	0	0	0	0	0.435294	0	0.153846	0.109091	0
Poaceae	Pleioblastus	Pleioblastus gramineus	0	0	0	0	0	0	0	0.0769231	0.109091	0
Poaceae	Poa	Poa acroleuca	0	0	0.0363636	0.0181818	0.0714286	0.0588235	0.0352941	0.169231	0.290909	0.05
Poaceae	Poa	Poa annua	0.0555556	0	0.0545455	0.163636	0.314286	0.0705882	0.2	0.107692	0.254545	0.2125
Poaceae	Poa	Poa attenuata	0.0555556	0.333333	0.0363636	0.145455	0	0	0	0	0	0
Poaceae	Poa	Poa compressa	0.0555556	0.333333	0.0909091	0.0363636	0	0.2	0.0235294	0	0	0
Poaceae	Poa	Poa faberi	0	0.333333	0.0363636	0.254545	0	0.141176	0.0705882	0.0769231	0.181818	0.1125
Poaceae	Poa	Poa nemoralis	0	0.333333	0.109091	0.2	0.157143	0	0.0352941	0.0769231	0	0
Poaceae	Poa	Poa nepalensis	0	0	0.0363636	0.0545455	0	0	0	0	0	0
Poaceae	Poa	Poa palustris	0.166667	0.333333	0.0363636	0.0909091	0.142857	0	0.0235294	0	0	0
Poaceae	Poa	Poa pratensis	0.277778	0.333333	0.163636	0.327273	0.471429	0.129412	0.0352941	0.153846	0	0.075
Poaceae	Poa	Poa sibirica	0.111111	0	0.0181818	0.0545455	0	0	0.0117647	0	0	0
Poaceae	Poa	Poa szechuensis	0	0.333333	0.0363636	0	0	0	0	0	0	0
Poaceae	Poa	Poa tangii	0	0.333333	0.0363636	0.145455	0	0	0.0117647	0	0	0
Poaceae	Poa	Poa araratica	0	0	0.0181818	0.0181818	0	0	0	0	0	0
Poaceae	Poa	Poa ianthina	0	0	0.0363636	0.0909091	0	0	0	0.0769231	0	0
Poaceae	Poa	Poa pratensis	0	0	0	0	0.142857	0	0	0.0769231	0	0
Poaceae	Poa	Poa prolixior	0	0	0	0.0181818	0	0	0	0.230769	0.2	0.075
Poaceae	Poa	Poa sphondylodes	0	0	0.0545455	0.0181818	0	0	0.0117647	0	0	0
Poaceae	Pogonatherum	Pogonatherum crinitum	0	0	0	0	0	0	0	0	0.345455	0.0875
Poaceae	Polypogon	Polypogon fugax	0.0555556	0	0.181818	0.290909	0	0.258824	0.305882	0.4	0.327273	0.0875
Poaceae	Polypogon	Polypogon monspeliensis	0.0555556	0.333333	0.0363636	0.0909091	0	0.0588235	0.0235294	0.261538	0.0909091	0
Poaceae	Ptilagrostis	Ptilagrostis mongholica	0.0555556	0.333333	0.0181818	0.0181818	0	0	0	0	0	0
Poaceae	Puccinellia	Puccinellia chinampoensis	0.0555556	0.466667	0.0363636	0.181818	0.228571	0.0588235	0	0.230769	0	0
Poaceae	Puccinellia	Puccinellia distans	0.166667	0.333333	0.0181818	0.0545455	0.0714286	0.129412	0.129412	0	0	0
Poaceae	Puccinellia	Puccinellia hauptiana	0.111111	0.333333	0.0545455	0.127273	0.242857	0.0588235	0	0	0	0
Poaceae	Puccinellia	Puccinellia manchuriensis	0.111111	0.333333	0.0363636	0	0	0.0588235	0.0705882	0.169231	0	0
Poaceae	Puccinellia	Puccinellia micrandra	0.0555556	0.0666667	0	0	0.0142857	0	0	0	0	0
Poaceae	Puccinellia	Puccinellia tenuiflora	0.111111	0.333333	0.181818	0.109091	0.214286	0.117647	0.0823529	0.0153846	0	0
Poaceae	Roegneria	Roegneria mayebarana	0	0	0.0181818	0.0545455	0.0714286	0.141176	0	0.169231	0.0545455	0.025
Poaceae	Roegneria	Roegneria nakaii	0.0555556	0.333333	0	0.0181818	0.157143	0	0	0	0	0
Poaceae	Roegneria	Roegneria pekinense	0.166667	0.666667	0.218182	0.109091	0.414286	0.364706	0.0823529	0.0769231	0	0.0625
Poaceae	Roegneria	Roegneria extremiorientale	0.111111	0.666667	0.109091	0.0181818	0.3	0.364706	0.0705882	0.230769	0	0.0125
Poaceae	Roegneria	Roegneria japonensis	0	0	0	0	0	1	0	0	0	0.075
Poaceae	Saccharum	Saccharum arundinaceum	0	0	0	0	0	0	0.0705882	0.0769231	0.236364	0.1
Poaceae	Saccharum	Saccharum spontaneum	0	0	0	0	0	0	0	0.0769231	0	0.0625
Poaceae	Saccharum	Sacciolepis indica	0	0	0	0	0.214286	0.141176	0	0.338462	0.454545	0.1875
Poaceae	Sasa	Sasa sinica	0	0	0	0	0	0	0	0	0.0181818	0.075
Poaceae	Schizachne	Schizachne purpurascens	0	0	0.0181818	0	0.0857143	0	0	0	0	0
Poaceae	Schizachne	Schizachyrium brevifolium	0.0555556	0.333333	0.0363636	0	0.142857	0.247059	0.0235294	0.307692	0.218182	0.2125
Poaceae	Secale	Secale cereale	0.0555556	0	0.0545455	0.145455	0.142857	0.0588235	0.105882	0.0769231	0	0.0625
Poaceae	Setaria	Setaria arenaria	0	0	0	0.0363636	0	0	0.0117647	0.0769231	0	0
Poaceae	Setaria	Setaria chondrachne	0	0	0	0	0	0	0	0.261538	0.109091	0.0625
Poaceae	Setaria	Setaria faberi	0	0	0	0.181818	0.0285714	0.188235	0.0117647	0.276923	0.381818	0.0375
Poaceae	Setaria	Setaria palmifolia	0	0	0	0	0	0	0	0	0.327273	0.1375
Poaceae	Setaria	Setaria plicata	0	0	0	0	0	0	0	0	0.381818	0.2
Poaceae	Shibataea	Shibataea hispida	0	0	0	0	0	0	0	0	0.0909091	0.025
Poaceae	Sorghum	Sorghum sudanense	0.0555556	0.333333	0	0.0909091	0	0	0	0.0769231	0.272727	0.2625
Poaceae	Sorghum	Sorghum nitidum	0	0	0	0	0	0.176471	0	0.307692	0.127273	0.2
Poaceae	Spartina	Spartina alterniflora	0	0	0.0181818	0	0	0	0	0.153846	0.454545	0
Poaceae	Spartina	Spartina anglica	0.0555556	0.333333	0	0	0	0.117647	0	0	0.0909091	0
Poaceae	Spodiopogon	Spodiopogon cotulifer	0	0	0	0	0	0.0823529	0	0.153846	0.127273	0.175
Poaceae	Sporobolus	Sporobolus fertilis	0	0	0	0	0	0.223529	0.0588235	0.369231	0.509091	0.225
Poaceae	Sporobolus	Sporobolus piliferus	0	0	0	0	0	0	0	0	0.0909091	0.0125
Poaceae	Stipa	Stipa baicalensis	0	0.333333	0.163636	0.181818	0.157143	0	0	0	0	0
Poaceae	Stipa	Stipa breviflora	0	0.333333	0.0181818	0.0727273	0	0	0	0	0	0
Poaceae	Stipa	Stipa bungeana	0.222222	0.333333	0.290909	0.618182	0.157143	0.270588	0.0823529	0.153846	0	0.0125
Poaceae	Stipa	Stipa capillata	0.0555556	0	0.0545455	0.0545455	0	0	0.0705882	0	0	0
Poaceae	Stipa	Stipa grandis	0.0555556	0.333333	0.0909091	0.327273	0.0142857	0	0.0705882	0	0	0
Poaceae	Stipa	Stipa przewalskyi	0	0	0.0363636	0.272727	0	0	0	0	0	0
Poaceae	Themeda	Themeda villosa	0	0	0.0181818	0	0	0	0	0	0.2	0
Poaceae	Themeda	Themeda triandra	0.0555556	0	0.0181818	0	0.0714286	0	0.164706	0.184615	0.109091	0.075
Poaceae	Tragus	Tragus mongolorum	0	0	0.0727273	0.127273	0.0714286	0.141176	0	0	0	0.0125
Poaceae	Tripogon	Tripogon chinensis	0.444444	0.666667	0.436364	0.254545	0.257143	0.317647	0.152941	0.0769231	0	0.025
Poaceae	Trisetum	Trisetum bifidum	0.0555556	0	0	0	0	0	0.0705882	0.0769231	0.2	0.3125
Poaceae	Trisetum	Trisetum henryi	0	0	0	0.0181818	0	0	0.0470588	0.0769231	0.127273	0.0375
Poaceae	Trisetum	Trisetum sibiricum	0	0.333333	0.181818	0.145455	0	0	0.105882	0.0769231	0	0
Poaceae	Trisetum	Trisetum spicatum	0	0	0.0363636	0.0727273	0	0	0	0	0	0
Poaceae	Triticum	Triticum turgidum	0	0	0.0181818	0	0	0	0	0.0769231	0	0
Poaceae	Vulpia	Vulpia myuros	0.0555556	0	0	0	0	0	0	0.0769231	0.0909091	0
Poaceae	Zizania	Zizania latifolia	0.166667	0	0.0363636	0	0.0714286	0.141176	0	0.184615	0.0909091	0.075
Poaceae	Zoysia	Zoysia japonica	0.0555556	0.333333	0.0909091	0	0.428571	0.541176	0.0705882	0.230769	0.109091	0.0375
Poaceae	Zoysia	Zoysia sinica	0	0	0.0181818	0	0.1	0.223529	0	0.0923077	0.0909091	0.0125
Podocarpaceae	Podocarpus	Podocarpus macrophyllus	0	0	0	0.0909091	0	0.0705882	0.0705882	0.0923077	0.472727	0.1125
Polygalaceae	Polygala	Polygala arillata	0	0	0	0	0	0	0	0	0.0545455	0.0875
Polygalaceae	Polygala	Polygala hongkongensis	0	0	0	0	0	0	0	0	0.236364	0.0625
Polygonaceae	Antenoron	Antenoron filiformis	0	0	0	0	0	0.129412	0.164706	0.4	0.8	0.3
Polygonaceae	Fagopyrum	Fagopyrum dibotrys	0	0	0	0	0	0.0588235	0.0705882	0.261538	0.563636	0.1875
Polygonaceae	Fagopyrum	Fagopyrum gracilipes	0	0	0.0181818	0	0	0	0.0941176	0	0	0
Polygonaceae	Fagopyrum	Fagopyrum tataricum	0.222222	0.666667	0.2	0.418182	0	0	0.0705882	0.0769231	0.0181818	0
Polygonaceae	Fallopia	Fallopia convolvulus	0.0555556	0	0.0181818	0.163636	0.242857	0.176471	0.0235294	0	0.0909091	0
Polygonaceae	Fallopia	Fallopia dumetorum	0	0	0	0	0.0714286	0.129412	0	0	0	0
Polygonaceae	Fallopia	Fallopia dentatoalata	0.166667	0	0.0181818	0.0181818	0.0857143	0.0117647	0	0	0	0
Polygonaceae	Fallopia	Pleuropterus multiflorus	0	0	0.0363636	0.0181818	0	0.141176	0.0588235	0.369231	0.527273	0.1625
Polygonaceae	Polygonum	Polygonum bungeana	0.388889	0.4	0.363636	0.218182	0.271429	0.0823529	0.0588235	0.153846	0	0
Polygonaceae	Polygonum	Polygonum chinensis	0	0	0.0181818	0	0.0714286	0.0117647	0	0.0153846	0.727273	0.0125
Polygonaceae	Polygonum	Polygonum criopolitana	0	0	0	0	0	0	0.0117647	0.215385	0.272727	0.2375
Polygonaceae	Polygonum	Polygonum dissitiflora	0	0.666667	0.0545455	0	0.214286	0.0588235	0.188235	0.0923077	0.545455	0.3625
Polygonaceae	Polygonum	Polygonum glacialis	0	0	0.0181818	0.0181818	0	0	0	0	0	0
Polygonaceae	Polygonum	Polygonum hastatosagittata	0	0	0.0545455	0	0.0857143	0	0.0235294	0.261538	0.381818	0.2
Polygonaceae	Polygonum	Polygonum japonica	0	0.333333	0	0	0	0	0.0823529	0.876923	0.527273	0.2125
Polygonaceae	Polygonum	Polygonum jucunda	0	0	0	0	0	0.0235294	0.0235294	0.630769	0.254545	0.35
Polygonaceae	Polygonum	Polygonum maculosa	0.0555556	0.333333	0.163636	0	0.4	0.352941	0.247059	0.430769	0.363636	0.1875
Polygonaceae	Polygonum	Polygonum muricata	0	0	0	0	0	0.0117647	0.0705882	0.169231	0.545455	0.1875
Polygonaceae	Polygonum	Polygonum posumbu	0.0555556	0	0.0181818	0	0.171429	0.164706	0.141176	0.461538	0.618182	0.3125
Polygonaceae	Polygonum	Polygonum praetermissa	0	0	0	0	0	0	0	0.169231	0.309091	0
Polygonaceae	Polygonum	Polygonum pubescens	0	0	0	0	0.0714286	0.0588235	0.0823529	0.246154	0.345455	0.2125
Polygonaceae	Polygonum	Polygonum rigidum	0.0555556	0.333333	0.0909091	0.145455	0.157143	0	0	0	0	0
Polygonaceae	Polygonum	Polygonum runcinata	0	0	0	0	0	0	0.164706	0	0.109091	0
Polygonaceae	Polygonum	Polygonum senticosa	0.277778	0.666667	0.163636	0	0.485714	0.188235	0.0117647	0.0923077	0.745455	0.2125
Polygonaceae	Polygonum	Polygonum sibirica	0.277778	0.333333	0.436364	0.854545	0.314286	0.211765	0.152941	0.184615	0	0.025
Polygonaceae	Polygonum	Polygonum suffulta	0.166667	0.666667	0.2	0.290909	0	0	0.0705882	0	0.0727273	0.1375
Polygonaceae	Polygonum	Polygonum taquetii	0	0	0	0.0909091	0	0.0588235	0.0235294	0.169231	0.236364	0.0125
Polygonaceae	Polygonum	Polygonum viscosa	0	0	0.0181818	0	0.242857	0.0117647	0.0235294	0.415385	0.218182	0.1125
Polygonaceae	Polygonum	Polygonum vivipara	0.0555556	0.666667	0.218182	0.418182	0.0714286	0	0.0235294	0	0	0
Polygonaceae	Polygonum	Polygonum alpinum	0.166667	0.333333	0.309091	0.0545455	0.157143	0.0823529	0	0	0	0
Polygonaceae	Polygonum	Polygonum ciliinerve	0.111111	0.333333	0.0909091	0.345455	0	0	0.235294	0	0	0
Polygonaceae	Polygonum	Polygonum divaricatum	0.166667	0.333333	0.381818	0.0363636	0.828571	0.117647	0.0117647	0	0	0
Polygonaceae	Polygonum	Polygonum senticosa	0	0	0.0181818	0	0	0	0.0235294	0	0.127273	0.1625
Polygonaceae	Polygonum	Polygonum viscoferum	0	0.333333	0.0545455	0	0.0714286	0.164706	0.0235294	0.2	0.163636	0.1
Polygonaceae	Reynoutria	Reynoutria japonica	0	0.333333	0	0	0.157143	0.117647	0.0235294	0.184615	0.418182	0.2
Polygonaceae	Rumex	Rumex acetosella	0	0	0.145455	0	0	0.0705882	0.0588235	0	0.0909091	0.0125
Polygonaceae	Rumex	Rumex chalepensis	0	0	0.0181818	0.109091	0	0.129412	0.2	0.246154	0.0909091	0.0125
Polygonaceae	Rumex	Rumex crispus	0.0555556	0.666667	0.272727	0.527273	0.0857143	0.188235	0.258824	0	0.109091	0
Polygonaceae	Rumex	Rumex dentatus	0.222222	0.333333	0.218182	0.181818	0	0.541176	0.541176	0.876923	0.218182	0.0875
Polygonaceae	Rumex	Rumex gmelinii	0.0555556	0.333333	0.127273	0.181818	0.0714286	0	0	0	0	0
Polygonaceae	Rumex	Rumex japonicus	0.277778	0.666667	0.0363636	0	0.314286	0.247059	0.164706	0.707692	0.563636	0.1375
Polygonaceae	Rumex	Rumex longifolius	0.166667	0.333333	0.0909091	0.127273	0.0142857	0.141176	0.0823529	0	0	0
Polygonaceae	Rumex	Rumex maritimus	0.166667	0	0.0181818	0	0.4	0.2	0	0.169231	0	0
Polygonaceae	Rumex	Rumex microcarpus	0	0.333333	0.0363636	0	0	0	0	0.0153846	0	0
Polygonaceae	Rumex	Rumex obtusifolius	0	0	0.0181818	0	0	0.0823529	0	0.230769	0.109091	0
Polygonaceae	Rumex	Rumex patientia	0.5	0.666667	0.363636	0.490909	0.457143	0.423529	0.211765	0.0769231	0	0
Polygonaceae	Rumex	Rumex trisetifer	0.111111	0.333333	0	0	0	0	0	0.107692	0.181818	0.025
Polygonaceae	Rumex	Rumex amurensis	0.166667	0.333333	0.163636	0	0.157143	0.164706	0	0.169231	0	0.075
Pontederiaceae	Eichhornia	Eichhornia crassipes	0	0.333333	0.0363636	0	0.0714286	0.0705882	0	0.153846	0.872727	0.125
Portulacaceae	Portulaca	Portulaca oleracea	0.388889	0	0.309091	0.454545	0.3	0.4	0.164706	0.707692	0.490909	0.2125
Potamogetonaceae	Potamogeton	Potamogeton cristatus	0	0	0	0	0	0.0588235	0.0588235	0.169231	0.127273	0
Potamogetonaceae	Potamogeton	Potamogeton lucens	0.111111	0.333333	0.0363636	0.0181818	0.0857143	0.0705882	0.0117647	0.323077	0.0909091	0
Potamogetonaceae	Potamogeton	Potamogeton oxyphyllus	0	0	0	0	0.142857	0	0	0.0769231	0.127273	0
Potamogetonaceae	Potamogeton	Potamogeton perfoliatus	0.277778	0.333333	0.109091	0.0727273	0.0857143	0.0588235	0	0	0	0
Potamogetonaceae	Potamogeton	Potamogeton pusillus	0.277778	0.333333	0.145455	0	0.242857	0.0588235	0.0117647	0.184615	0.0363636	0
Potamogetonaceae	Primula	Primula maximowiczii	0.333333	0.333333	0.2	0.363636	0	0	0.0470588	0	0	0
Potamogetonaceae	Ruppia	Ruppia maritima	0	0.0666667	0.0181818	0	0.157143	0.0588235	0	0.0923077	0.0181818	0
Primulaceae	Lysimachia	Lysimachia candida	0.0555556	0	0.0181818	0	0	0.388235	0.2	0.615385	0.345455	0.375
Primulaceae	Lysimachia	Lysimachia capillipes	0	0	0	0	0	0	0	0	0.327273	0.125
Primulaceae	Lysimachia	Lysimachia christinae	0	0	0.0181818	0	0	0	0.2	0.276923	0.309091	0.1875
Primulaceae	Lysimachia	Lysimachia clethroides	0.111111	0	0	0.0181818	0.271429	0.129412	0.470588	0.569231	0.545455	0.3
Primulaceae	Lysimachia	Lysimachia congestiflora	0	0	0	0	0	0	0.117647	0.0769231	0.436364	0.0875
Primulaceae	Lysimachia	Lysimachia davurica	0.166667	0	0.0181818	0	0.542857	0.0705882	0	0	0	0
Primulaceae	Lysimachia	Lysimachia grammica	0.0555556	0	0	0	0	0	0.176471	0.261538	0.127273	0.075
Primulaceae	Lysimachia	Lysimachia hemsleyana	0	0	0	0.0909091	0	0	0.152941	0	0.509091	0.3
Primulaceae	Lysimachia	Lysimachia heterogenea	0	0	0	0	0	0	0.152941	0.107692	0.472727	0.2375
Primulaceae	Lysimachia	Lysimachia japonica	0	0	0	0	0	0	0	0	0.236364	0.0125
Primulaceae	Lysimachia	Lysimachia klattiana	0	0	0	0	0	0.0823529	0.0941176	0.461538	0	0.275
Primulaceae	Lysimachia	Lysimachia longipes	0	0	0	0	0	0	0	0	0.418182	0.1125
Primulaceae	Lysimachia	Lysimachia mauritiana	0	0	0	0	0	0.176471	0	0.0923077	0.309091	0
Primulaceae	Lysimachia	Lysimachia parvifolia	0	0	0	0	0	0.117647	0.0235294	0.0769231	0.127273	0.025
Primulaceae	Lysimachia	Lysimachia patungensis	0	0	0	0	0	0	0	0	0.345455	0.1125
Primulaceae	Lysimachia	Lysimachia pseudohenryi	0	0	0	0	0	0	0.0823529	0	0.109091	0.1625
Primulaceae	Lysimachia	Lysimachia remota	0	0	0	0	0	0	0.0588235	0.153846	0.309091	0.075
Primulaceae	Primula	Primula ranunculoides	0	0	0	0	0	0	0	0	0.0545455	0.0125
Primulaceae	Stimpsonia	Stimpsonia chamaedryoides	0	0	0	0	0	0	0	0.169231	0.509091	0.0375
Primulaceae	Androsace	Androsace incana	0	0.333333	0.0363636	0.0181818	0	0	0	0	0	0
Primulaceae	Cortusa	Cortusa matthioli	0.277778	0.333333	0.290909	0.181818	0	0	0.0117647	0	0	0
Primulaceae	Glaux	Lysimachia maritima	0.166667	0.333333	0.145455	0.272727	0.0142857	0.0117647	0.0705882	0.107692	0	0
Primulaceae	Primula	Primula saxatilis	0.0555556	0.333333	0.0545455	0.0181818	0	0	0	0	0	0
Pyrolaceae	Monotropa	Monotropa uniflora	0	0	0	0.0181818	0	0	0	0	0.0727273	0.15
Pyrolaceae	Pyrola	Pyrola calliantha	0.166667	0	0.0727273	0.127273	0.0714286	0.0588235	0.0470588	0	0.145455	0.2125
Pyrolaceae	Pyrola	Pyrola decorata	0	0	0	0	0.0714286	0	0.0235294	0	0.272727	0.15
Pyrolaceae	Pyrola	Pyrola rotundifolia	0.111111	0.333333	0.0727273	0.0727273	0	0	0.0235294	0	0.145455	0
Pyrolaceae	Pyrola	Pyrola rotundifolia	0.166667	0.333333	0.0545455	0	0.0714286	0	0.0117647	0	0	0
Pyrolaceae	Chimaphila	Chimaphila japonica	0	0	0	0.145455	0.142857	0	0.0235294	0	0	0.025
Pyrolaceae	Monotropa	Hypopitys monotropa	0	0	0.0181818	0.0545455	0	0	0	0	0.0363636	0
Pyrolaceae	Pyrola	Pyrola asarifolia	0	0.333333	0.127273	0.109091	0.0714286	0	0.0117647	0	0	0
Ranunculaceae	Aconitum	Aconitum barbatum	0.333333	0.333333	0.290909	0.163636	0	0	0.0941176	0	0	0
Ranunculaceae	Aconitum	Aconitum kirinense	0	0	0	0.0181818	0.1	0	0	0	0	0
Ranunculaceae	Aconitum	Aconitum kusnezoffii	0.333333	0.666667	0.454545	0.509091	0.357143	0.0117647	0.0235294	0	0	0
Ranunculaceae	Aconitum	Aconitum sinomontanum	0.222222	0.333333	0.181818	0.2	0	0	0.117647	0	0.0909091	0
Ranunculaceae	Aconitum	Aconitum smithii	0	0	0.0181818	0.181818	0	0	0	0	0	0
Ranunculaceae	Actaea	Actaea asiatica	0.222222	0.666667	0.254545	0.2	0.3	0	0.0823529	0	0	0.025
Ranunculaceae	Actaea	Actaea erythrocarpa	0	0	0.0181818	0.0181818	0.0142857	0	0	0	0	0
Ranunculaceae	Anemone	Anemone altaica	0	0	0.0181818	0.381818	0	0	0.0705882	0	0	0
Ranunculaceae	Anemone	Anemone cathayensis	0.222222	0.333333	0.236364	0.0727273	0	0	0.0235294	0	0	0
Ranunculaceae	Anemone	Anemone rivularis	0.111111	0.333333	0.145455	0.290909	0	0	0.0588235	0	0	0
Ranunculaceae	Anemone	Anemone tomentosa	0	0.333333	0.145455	0.909091	0	0	0.458824	0.0769231	0.0909091	0
Ranunculaceae	Aquilegia	Aquilegia viridiflora	0.388889	0.333333	0.436364	0.218182	0.228571	0.317647	0.0941176	0	0	0
Ranunculaceae	Aquilegia	Aquilegia yabeana	0.388889	0.666667	0.454545	0.563636	0.0428571	0.152941	0.376471	0	0	0
Ranunculaceae	Cimicifuga	Cimicifuga cimicifuga	0.0555556	0.333333	0.0545455	0.290909	0	0.0117647	0.0705882	0	0.127273	0.025
Ranunculaceae	Cimicifuga	Cimicifuga dahurica	0.333333	0.666667	0.309091	0.309091	0.271429	0.176471	0.0117647	0	0	0
Ranunculaceae	Clematis	Clematis aethusifolia	0.444444	0.333333	0.4	0.563636	0	0	0	0	0	0.0125
Ranunculaceae	Clematis	Clematis fruticosa	0.0555556	0.333333	0.0727273	0.872727	0	0	0	0	0	0
Ranunculaceae	Clematis	Clematis hexapetala	0.444444	0.666667	0.545455	0.890909	0.9	0.152941	0.152941	0.0153846	0	0.025
Ranunculaceae	Clematis	Clematis intricata	0.444444	0.666667	0.363636	1	0.0285714	0	0.0117647	0.0769231	0	0
Ranunculaceae	Clematis	Clematis kirilowii	0.0555556	0.333333	0.163636	0.345455	0	0.470588	0.352941	0.246154	0	0.0375
Ranunculaceae	Clematis	Clematis macropetala	0.166667	0.333333	0.254545	0.272727	0.0285714	0	0.0235294	0	0	0
Ranunculaceae	Clematis	Clematis obscura	0	0	0.0181818	0.418182	0.0142857	0	0.0117647	0	0	0
Ranunculaceae	Clematis	Clematis shensiensis	0	0	0	0.163636	0	0	0.0352941	0	0	0
Ranunculaceae	Clematis	Clematis pinnata	0.222222	0.333333	0.0545455	0	0.0714286	0	0	0	0	0
Ranunculaceae	Delphinium	Delphinium giraldii	0	0	0	0.0363636	0	0	0.0941176	0	0	0
Ranunculaceae	Delphinium	Delphinium grandiflorum	0.388889	0.333333	0.527273	0.872727	0.142857	0	0.152941	0	0	0
Ranunculaceae	Delphinium	Delphinium trisectum	0	0	0	0	0	0	0.105882	0	0	0.0125
Ranunculaceae	Delphinium	Delphinium siwanense	0	0	0.0181818	0.0363636	0	0	0	0	0	0
Ranunculaceae	Dichocarpum	Dichocarpum fargesii	0	0	0	0	0	0	0.0470588	0	0	0.075
Ranunculaceae	Halerpestes	Halerpestes ruthenica	0.0555556	0.333333	0.109091	0.418182	0.0428571	0	0	0.0153846	0	0.0125
Ranunculaceae	Leptopyrum	Leptopyrum fumarioides	0	0.333333	0.0727273	0.0181818	0.142857	0	0	0	0	0
Ranunculaceae	Ranunculus	Ranunculus monophyllus	0	0	0.0727273	0.0181818	0	0	0	0	0	0
Ranunculaceae	Ranunculus	Ranunculus repens	0.0555556	0	0	0	0.0857143	0	0	0	0	0
Ranunculaceae	Thalictrum	Thalictrum baicalense	0.166667	0.333333	0.309091	0.181818	0.1	0	0.141176	0	0	0
Ranunculaceae	Thalictrum	Thalictrum fargesii	0	0	0	0	0	0	0.0823529	0	0	0.025
Ranunculaceae	Thalictrum	Thalictrum foeniculaceum	0.111111	0.333333	0.127273	0.163636	0.0714286	0.0705882	0	0	0	0
Ranunculaceae	Thalictrum	Thalictrum foetidum	0.0555556	0	0.254545	0.163636	0	0	0.0235294	0	0	0
Ranunculaceae	Thalictrum	Thalictrum macrorhynchum	0	0.333333	0.109091	0.254545	0	0	0.141176	0	0	0.0125
Ranunculaceae	Thalictrum	Thalictrum minus	0.166667	0	0.109091	0.254545	0.0857143	0	0.0352941	0.0769231	0	0
Ranunculaceae	Thalictrum	Thalictrum przewalskii	0.166667	0.333333	0.309091	0.290909	0	0	0.129412	0	0	0
Ranunculaceae	Thalictrum	Thalictrum robustum	0	0	0	0	0	0	0.2	0	0.0181818	0.0125
Ranunculaceae	Thalictrum	Thalictrum simplex	0.111111	0.333333	0.0909091	0	0.114286	0.176471	0	0	0	0
Ranunculaceae	Thalictrum	Thalictrum squarrosum	0.222222	0.333333	0.290909	0.4	0.2	0.0117647	0.0235294	0	0	0
Ranunculaceae	Thalictrum	Thalictrum tenue	0.277778	0	0.0363636	0.381818	0	0	0	0	0	0
Ranunculaceae	Trollius	Trollius chinensis	0.277778	0.333333	0.290909	0.563636	0	0	0.0117647	0	0	0
Ranunculaceae	Aconitum	Aconitum finetianum	0	0	0	0	0	0	0.0117647	0	0.218182	0.1125
Ranunculaceae	Aconitum	Aconitum hemsleyanum	0	0	0	0	0	0	0.129412	0	0.127273	0.0375
Ranunculaceae	Aconitum	Aconitum henryi	0	0	0	0.0181818	0	0	0.0235294	0	0.0181818	0
Ranunculaceae	Aconitum	Aconitum carmichaeli Debeaux var. truppelianum	0	0	0	0	0.0142857	0.141176	0.0117647	0.169231	0.0363636	0
Ranunculaceae	Aconitum	Aconitum carmichaelii var. hwangshanicum	0	0	0	0	0	0	0	0	0.0363636	0.075
Ranunculaceae	Anemone	Anemone flaccida	0	0	0	0	0	0	0.0823529	0.323077	0.163636	0.1125
Ranunculaceae	Anemone	Anemone hupehensis	0	0	0	0	0	0	0.0823529	0.0153846	0.345455	0.0125
Ranunculaceae	Batrachium	Batrachium bungei	0.333333	0.333333	0.181818	0.0181818	0.1	0	0.0117647	0.0769231	0.0909091	0.0125
Ranunculaceae	Caltha	Caltha palustris	0	0.333333	0.0545455	0.0727273	0.0142857	0	0.0117647	0	0.0181818	0
Ranunculaceae	Cimicifuga	Cimicifuga simplex	0.111111	0	0.0363636	0.0363636	0.0285714	0	0.0470588	0	0.0181818	0
Ranunculaceae	Clematis	Clematis apiifolia	0	0	0	0	0	0	0.0117647	0.338462	1	0.2625
Ranunculaceae	Clematis	Clematis cadmia	0	0	0	0	0	0	0	0.307692	0.0363636	0.0125
Ranunculaceae	Clematis	Clematis chinensis	0.111111	0	0	0.0181818	0	0.0705882	0.258824	0.492308	0.6	0.225
Ranunculaceae	Clematis	Clematis courtoisii	0	0	0	0	0	0	0.0941176	0.0153846	0.181818	0.1625
Ranunculaceae	Clematis	Clematis finetiana	0	0	0	0	0	0	0.117647	0.107692	0.781818	0.2875
Ranunculaceae	Clematis	Clematis hancockiana	0	0	0	0	0	0	0.0705882	0.0923077	0.127273	0.0625
Ranunculaceae	Clematis	Clematis henryi	0	0	0	0.0181818	0	0	0	0.0307692	0.381818	0.2625
Ranunculaceae	Clematis	Clematis huchouensis	0	0	0	0	0	0	0	0.307692	0.236364	0.0625
Ranunculaceae	Clematis	Clematis lasiandra	0	0	0	0.0181818	0	0	0.141176	0	0.254545	0.0875
Ranunculaceae	Clematis	Clematis montana	0	0	0	0.0727273	0	0	0.176471	0	0.0363636	0.1125
Ranunculaceae	Clematis	Clematis peterae	0	0.333333	0.0909091	0.436364	0	0	0.388235	0	0.0181818	0.0125
Ranunculaceae	Clematis	Clematis terniflora	0.0555556	0	0	0.0909091	0	0	0.223529	0.707692	0.345455	0.225
Ranunculaceae	Clematis	Clematis uncinata	0	0	0	0	0	0	0.0117647	0.0307692	0.854545	0.2
Ranunculaceae	Coptis	Coptis chinensis	0	0	0	0	0.0142857	0.0588235	0	0	0.218182	0.1
Ranunculaceae	Delphinium	Delphinium anthriscifolium	0	0	0	0.0181818	0	0	0.117647	0.353846	0.581818	0.325
Ranunculaceae	Dichocarpum	Dichocarpum dalzielii	0	0	0	0	0	0	0	0	0.181818	0.0125
Ranunculaceae	Hepatica	Hepatica nobilis	0	0	0	0	0.0428571	0	0.0117647	0	0.163636	0.1125
Ranunculaceae	Paeonia	Paeonia obovata	0.222222	0.333333	0.345455	0.327273	0.4	0	0.117647	0	0.145455	0.175
Ranunculaceae	Ranunculus	Ranunculus cantoniensis	0.0555556	0	0	0.0909091	0	0	0.0941176	0.492308	0.436364	0.175
Ranunculaceae	Ranunculus	Ranunculus muricatus	0	0	0	0	0	0	0.0588235	0.323077	0.745455	0.2625
Ranunculaceae	Ranunculus	Ranunculus sieboldii	0	0	0	0	0	0	0.176471	0.569231	0.472727	0.1375
Ranunculaceae	Ranunculus	Ranunculus ternatus	0	0	0.0181818	0	0	0.0117647	0.117647	0.353846	0.4	0.35
Ranunculaceae	Semiaquilegia	Semiaquilegia adoxoides	0	0	0	0	0	0.0588235	0.105882	0.369231	0.636364	0.3
Ranunculaceae	Thalictrum	Thalictrum acutifolium	0	0	0.0181818	0	0.0714286	0	0.0117647	0	0.418182	0.1125
Ranunculaceae	Thalictrum	Thalictrum faberi	0	0	0	0	0	0	0.141176	0.107692	0.454545	0.0875
Ranunculaceae	Thalictrum	Thalictrum fortunei	0	0	0	0	0	0	0.141176	0.338462	0.418182	0.2375
Ranunculaceae	Thalictrum	Thalictrum ichangense	0	0	0	0	0.242857	0.0117647	0	0	0.109091	0
Ranunculaceae	Thalictrum	Thalictrum petaloideum	0.388889	0.333333	0.490909	0.945455	0.0142857	0.0117647	0.0470588	0	0.0363636	0.0375
Ranunculaceae	Thalictrum	Thalictrum aquilegiifolium	0	0	0.0363636	0.0181818	0.342857	0.0823529	0.0823529	0.0769231	0.0181818	0.025
Rhamnaceae	Berchemia	Berchemia barbigera	0	0	0	0	0	0	0	0	0.0181818	0.0875
Rhamnaceae	Berchemia	Berchemia floribunda	0	0	0	0.163636	0	0	0.317647	0.0923077	0.472727	0.225
Rhamnaceae	Berchemia	Berchemia huana	0	0	0	0	0	0	0	0	0.218182	0.1125
Rhamnaceae	Berchemia	Berchemia kulingensis	0	0	0	0	0	0	0.0117647	0.0153846	0.509091	0.125
Rhamnaceae	Berchemia	Berchemia sinica	0	0	0	0.0909091	0	0	0.2	0	0.0363636	0.0125
Rhamnaceae	Hovenia	Hovenia acerba	0	0	0.0181818	0.0363636	0	0.235294	0.141176	0.353846	0.2	0.175
Rhamnaceae	Hovenia	Hovenia trichocarpa	0	0	0	0	0	0	0	0	0.0545455	0.0625
Rhamnaceae	Hovenia	Hovenia dulcis	0.111111	0.333333	0.0545455	0.145455	0	0.388235	0.247059	0	0.145455	0.225
Rhamnaceae	Paliurus	Paliurus hemsleyanus	0	0	0	0	0	0	0.164706	0.107692	0.145455	0.15
Rhamnaceae	Paliurus	Paliurus hirsutus	0	0	0	0	0	0	0.0117647	0	0.109091	0.075
Rhamnaceae	Paliurus	Paliurus ramosissimus	0	0	0	0	0	0	0.0352941	0.0769231	0.2	0
Rhamnaceae	Rhamnella	Rhamnella franguloides	0.0555556	0	0	0	0	0.376471	0.176471	0.461538	0.363636	0.325
Rhamnaceae	Rhamnus	Rhamnus arguta	0.222222	0.666667	0.345455	0.236364	0.4	0.482353	0.0470588	0	0	0
Rhamnaceae	Rhamnus	Rhamnus bungeana	0.111111	0.666667	0.290909	0.4	0	0.435294	0.211765	0	0	0
Rhamnaceae	Rhamnus	Rhamnus crenata	0	0	0	0.0181818	0	0	0.117647	0.292308	0.745455	0.35
Rhamnaceae	Rhamnus	Rhamnus davurica	0.111111	0	0.0727273	0.0909091	0.642857	0.470588	0.223529	0.0153846	0	0
Rhamnaceae	Rhamnus	Rhamnus dumetorum	0	0	0	0.109091	0	0.0117647	0.0823529	0	0	0.0125
Rhamnaceae	Rhamnus	Rhamnus erythroxylum	0	0.333333	0.109091	0.290909	0	0	0.0588235	0	0	0
Rhamnaceae	Rhamnus	Rhamnus leptophylla	0	0.4	0.0363636	0.0181818	0.157143	0.141176	0.211765	0.0923077	0.0727273	0.175
Rhamnaceae	Rhamnus	Rhamnus maximovicziana	0	0.333333	0.0181818	0.309091	0	0	0	0	0	0
Rhamnaceae	Rhamnus	Rhamnus parvifolia	0.388889	0.666667	0.509091	0.909091	0.385714	0.564706	0.105882	0	0	0.0125
Rhamnaceae	Rhamnus	Rhamnus rugulosa	0	0	0	0.345455	0	0	0.164706	0	0.109091	0.125
Rhamnaceae	Rhamnus	Rhamnus schneideri	0.0555556	0.333333	0.272727	0.0363636	0.385714	0	0	0	0	0
Rhamnaceae	Rhamnus	Rhamnus wilsonii	0	0	0	0	0	0	0	0.0153846	0.327273	0.175
Rhamnaceae	Sageretia	Sageretia melliana	0	0	0	0	0	0	0	0	0.2	0.0875
Rhamnaceae	Sageretia	Sageretia paucicostata	0.0555556	0.333333	0.181818	0.690909	0	0	0.0941176	0	0	0
Rhamnaceae	Sageretia	Sageretia thea	0	0	0.0181818	0.0181818	0	0	0.176471	0.292308	0.418182	0.0875
Rosaceae	Agrimonia	Agrimonia nipponica	0	0	0	0.0181818	0	0	0	0.0153846	0.145455	0.075
Rosaceae	Amelanchier	Amelanchier asiatica	0	0	0	0	0	0.0588235	0.0588235	0	0.309091	0.175
Rosaceae	Aruncus	Aruncus sylvester	0.0555556	0	0.0181818	0.0181818	0.285714	0	0.0470588	0	0.145455	0.0875
Rosaceae	Chaenomeles	Chaenomeles sinensis	0.0555556	0.333333	0.0181818	0	0	0.447059	0.223529	0.430769	0.127273	0.0375
Rosaceae	Chaenomeles	Chaenomeles cathayensis	0	0	0	0	0	0.247059	0	0	0.0727273	0
Rosaceae	Chaenomeles	Chaenomeles japonica	0.0555556	0	0	0	0	0.176471	0	0.0769231	0.0909091	0
Rosaceae	Chamaerhodos	Chamaerhodos canescens	0.111111	0.333333	0.254545	0.0545455	0.0857143	0	0	0	0	0
Rosaceae	Chamaerhodos	Chamaerhodos erecta	0.222222	0.666667	0.472727	0.527273	0.171429	0	0.0117647	0	0.0181818	0
Rosaceae	Cotoneaster	Cotoneaster acutifolius	0.388889	0.333333	0.436364	1	0.0142857	0	0.305882	0	0	0
Rosaceae	Cotoneaster	Cotoneaster divaricatus	0.0555556	0	0	0	0	0	0.0117647	0	0	0.0125
Rosaceae	Cotoneaster	Cotoneaster horizontalis	0.0555556	0	0.0181818	0	0	0.423529	0.152941	0.0769231	0.109091	0.0125
Rosaceae	Cotoneaster	Cotoneaster melanocarpus	0.166667	0.333333	0.0545455	0.0909091	0.0714286	0.0117647	0.0117647	0	0	0
Rosaceae	Cotoneaster	Cotoneaster multiflorus	0.277778	0.333333	0.2	0.963636	0.242857	0.0588235	0.294118	0	0	0
Rosaceae	Cotoneaster	Cotoneaster silvestrii	0	0	0	0	0	0	0.235294	0.153846	0	0.075
Rosaceae	Cotoneaster	Cotoneaster soongoricus	0	0.333333	0	0.0545455	0	0	0.0117647	0	0	0
Rosaceae	Cotoneaster	Cotoneaster submultiflorus	0	0	0.0545455	0.490909	0.0714286	0.0588235	0.0352941	0	0	0
Rosaceae	Cotoneaster	Cotoneaster zabelii	0.166667	0.666667	0.218182	0.981818	0	0.223529	0.282353	0	0	0
Rosaceae	Crataegus	Crataegus cuneata	0	0	0.0181818	0.0363636	0	0.0941176	0.2	0.630769	0.945455	0.7
Rosaceae	Crataegus	Crataegus hupehensis	0	0	0	0.109091	0	0.129412	0.2	0.246154	0.4	0.0375
Rosaceae	Crataegus	Crataegus kansuensis	0.222222	0.333333	0.290909	0.890909	0	0	0.0352941	0	0	0
Rosaceae	Crataegus	Crataegus aurantia	0	0	0	0.127273	0	0	0.0235294	0	0	0.0125
Rosaceae	Crataegus	Crataegus wilsonii	0	0	0.0181818	0.2	0	0	0.152941	0.0769231	0.0181818	0.0625
Rosaceae	Eriobotrya	Eriobotrya giraldii	0	0	0.0545455	0.527273	0	0	0.0823529	0.0153846	0.145455	0.025
Rosaceae	Eriobotrya	Eriobotrya japonica	0	0	0	0	0	0.388235	0.129412	0.246154	0.363636	0.125
Rosaceae	Eriobotrya	Eriobotrya racemosa	0.0555556	0	0.0181818	0.0181818	0.0714286	0.117647	0.223529	0.323077	0.472727	0.1375
Rosaceae	Fragaria	Fragaria orientalis	0	0.333333	0.0909091	0.454545	0	0	0.0705882	0.0769231	0	0
Rosaceae	Geum	Geum aleppicum	0.388889	0.666667	0.490909	0.818182	0.685714	0.176471	0.270588	0	0.109091	0.025
Rosaceae	Geum	Geum japonicum	0	0	0.0181818	0.0909091	0	0.0823529	0.0588235	0.107692	0.381818	0.175
Rosaceae	Kerria	Kerria japonica	0.166667	0	0.0181818	0.109091	0.214286	0.729412	0.435294	0.246154	0.509091	0.35
Rosaceae	Laurocerasus	Laurocerasus phaeosticta	0	0	0	0	0	0	0	0	0.0909091	0.025
Rosaceae	Laurocerasus	Laurocerasus spinulosa	0	0	0	0	0	0	0.0117647	0.0153846	0.236364	0.1
Rosaceae	Laurocerasus	Laurocerasus hypoleuca	0	0	0	0	0	0	0.0352941	0	0.0363636	0.025
Rosaceae	Malus	Malus asiatica	0.333333	0.666667	0.145455	0.181818	0.0142857	0.0941176	0.0705882	0.0769231	0	0.025
Rosaceae	Malus	Malus baccata	0.444444	0.666667	0.4	0.6	0.885714	0.729412	0.211765	0	0.145455	0.0125
Rosaceae	Malus	Malus halliana	0.0555556	0	0	0	0.0857143	0.729412	0.0823529	0.153846	0.145455	0.0125
Rosaceae	Malus	Malus honanensis	0.0555556	0	0.0545455	0.381818	0	0	0.2	0	0	0
Rosaceae	Malus	Malus hupehensis	0.0555556	0	0	0.218182	0.0714286	0.576471	0.305882	0.184615	0.545455	0.2
Rosaceae	Malus	Malus pumila	0.277778	0.333333	0.145455	0.163636	0.157143	0.870588	0.0588235	0.0769231	0.218182	0
Rosaceae	Malus	Malus baccata	0.111111	0	0.0181818	0.0909091	0.0142857	0.188235	0.0117647	0	0.109091	0
Rosaceae	Malus	Malus hupehensis	0.333333	0.333333	0.163636	0.290909	0.157143	0.364706	0.0117647	0	0.145455	0.075
Rosaceae	Padus	Padus brachypoda	0	0	0	0	0	0	0.0470588	0	0.0545455	0.0625
Rosaceae	Padus	Padus buergeriana	0	0.333333	0.0181818	0	0.0714286	0	0.0588235	0.0153846	0.181818	0.0875
Rosaceae	Padus	Padus obtusata	0	0	0	0	0	0	0.0235294	0.0153846	0.0727273	0.05
Rosaceae	Padus	Padus velutina	0	0	0	0.0363636	0	0	0	0	0.0181818	0
Rosaceae	Padus	Padus wilsonii	0	0	0	0	0	0	0	0	0.0909091	0.0625
Rosaceae	Photinia	Photinia beauverdiana	0	0	0	0	0	0	0.164706	0.184615	0.454545	0.3375
Rosaceae	Photinia	Photinia bodinieri	0	0	0	0	0	0	0	0.0769231	0.109091	0.075
Rosaceae	Photinia	Photinia glabra	0	0	0	0.0181818	0	0.0588235	0.0117647	0.184615	0.872727	0.3125
Rosaceae	Photinia	Photinia hirsuta	0	0	0	0	0	0	0	0	0.254545	0.1
Rosaceae	Photinia	Photinia parvifolia	0	0	0	0.0181818	0	0	0	0.184615	0.854545	0.2625
Rosaceae	Photinia	Photinia schneideriana	0	0	0	0	0	0	0	0	0.490909	0.025
Rosaceae	Photinia	Photinia villosa	0	0	0	0	0	0.117647	0.0352941	0.169231	0.654545	0.1375
Rosaceae	Potentilla	Potentilla acaulis	0	0.333333	0.0363636	0.0363636	0	0	0	0.0769231	0	0
Rosaceae	Potentilla	Potentilla ancistrifolia	0.388889	0.666667	0.290909	0.345455	0.357143	0	0.247059	0	0	0
Rosaceae	Potentilla	Potentilla anserina	0.388889	0.333333	0.381818	0.436364	0.328571	0.0117647	0.0588235	0	0.0909091	0
Rosaceae	Potentilla	Potentilla conferta	0.222222	0.333333	0.272727	0.0909091	0	0	0	0	0	0
Rosaceae	Potentilla	Potentilla flagellaris	0.388889	0.333333	0.181818	0.2	0.357143	0.270588	0.0117647	0.153846	0	0
Rosaceae	Potentilla	Potentilla kleiniana	0	0	0	0	0.285714	0.411765	0.164706	0.415385	0.745455	0.325
Rosaceae	Potentilla	Potentilla longifolia	0.166667	0.333333	0.2	0.327273	0	0.117647	0	0	0	0
Rosaceae	Potentilla	Potentilla multicaulis	0.388889	0.333333	0.327273	0.836364	0.414286	0.0705882	0.411765	0.0769231	0	0
Rosaceae	Potentilla	Potentilla multifida	0.222222	0	0.0909091	0.145455	0.0714286	0	0	0	0	0
Rosaceae	Potentilla	Potentilla nivea	0.0555556	0	0.0545455	0.0545455	0	0	0	0.0769231	0	0
Rosaceae	Potentilla	Potentilla reptans	0.166667	0	0.145455	0.0363636	0	0	0	0	0	0
Rosaceae	Potentilla	Potentilla simulatrix	0.222222	0.333333	0.290909	0.327273	0	0	0	0	0	0
Rosaceae	Potentilla	Potentilla sischanensis	0.111111	0.666667	0.0909091	0.654545	0	0	0	0	0	0
Rosaceae	Potentilla	Potentilla tanacetifolia	0.277778	0.333333	0.4	0.872727	0.171429	0.0117647	0.0117647	0	0	0
Rosaceae	Potentilla	Potentilla bifurca	0.277778	0.333333	0.254545	0.527273	0.0285714	0	0	0	0	0
Rosaceae	Potentilla	Prinsepia uniflora	0.0555556	0	0	0.181818	0.142857	0	0	0	0	0
Rosaceae	Prunus	Prunus clarofolia	0	0	0	0.181818	0	0	0	0	0.0181818	0.0125
[truncated: 412 more rows]
