# Supplementary material for: Floristic analyses of Shandong peninsula and adjacent areas indicate the barrier effect of the Yellow river on floristic diversity
Source: Front Plant Sci. 2024 Aug 15;15:1419876. doi: 10.3389/fpls.2024.1419876 (PMC11358103; doi:10.3389/fpls.2024.1419876)
Supplement: Supplementary file 3 [file Table3.xlsx]

## Sheet: 山东
Supplementary Table 3 Summarizes the species and their respective taxa in the Shandong Peninsula
Order	Family	Genus	Species
Acorales	Araceae	Acorus	Acorus tatarinowii
Alismatales	Alismataceae	Alisma	Alisma plantago-aquatica
Alismatales	Alismataceae	Sagittaria	Sagittaria trifolia
Alismatales	Araceae	Arisaema	Arisaema amurense
Alismatales	Araceae	Pistia	Pistia stratiotes
Alismatales	Araceae	Zantedeschia	Zantedeschia aethiopica
Alismatales	Butomaceae	Butomus	Butomus umbellatus
Alismatales	Juncaginaceae	Triglochin	Triglochin maritima
Alismatales	Potamogetonaceae	Potamogeton	Potamogeton cristatus
Alismatales	Potamogetonaceae	Potamogeton	Potamogeton lucens
Alismatales	Potamogetonaceae	Potamogeton	Potamogeton perfoliatus
Alismatales	Potamogetonaceae	Potamogeton	Potamogeton pusillus
Alismatales	Potamogetonaceae	Ruppia	Ruppia maritima
Apiales	Apiaceae	Angelica	Angelica cartilaginomarginata
Apiales	Apiaceae	Bupleurum	Bupleurum scorzonerifolium
Apiales	Apiaceae	Carum	Carum buriaticum
Apiales	Apiaceae	Carum	Carum carvi
Apiales	Apiaceae	Cicuta	Cicuta virosa
Apiales	Apiaceae	Ferula	Ferula licentiana
Apiales	Apiaceae	Libanotis	Libanotis lancifolia
Apiales	Apiaceae	Libanotis	Libanotis seseloides
Apiales	Apiaceae	Ligusticum	Ligusticum ajanense
Apiales	Apiaceae	Ligusticum	Ligusticum jeholense
Apiales	Apiaceae	Peucedanum	Peucedanum wawrae
Apiales	Apiaceae	Pimpinella	Pimpinella thellungiana
Apiales	Apiaceae	Saposhnikovia	Saposhnikovia divaricata
Apiales	Araliaceae	Aralia	Aralia elata
Apiales	Araliaceae	Fatsia	Fatsia japonica
Apiales	Araliaceae	Hedera	Hedera nepalensis
Apiales	Araliaceae	Kalopanax	Kalopanax septemlobus
Apiales	Araliaceae	Eleutherococcus	Eleutherococcus senticosus
Apiales	Araliaceae	Panax	Panax ginseng
Aquifoliales	Aquifoliaceae	Ilex	Ilex buergeri
Aquifoliales	Aquifoliaceae	Ilex	Ilex chinensis
Aquifoliales	Aquifoliaceae	Ilex	Ilex cornuta
Aquifoliales	Aquifoliaceae	Ilex	Ilex crenata
Aquifoliales	Aquifoliaceae	Ilex	Ilex latifolia
Aquifoliales	Aquifoliaceae	Ilex	Ilex pernyi
Arales	Lemnaceae	Lemna	Lemna trisulca
Arales	Lemnaceae	Wolffia	Wolffia arrhiza
Asparagales	Amaryllidaceae	Lycoris	Lycoris radiata
Asparagales	Orchidaceae	Habenaria	Habenaria linearifolia
Asparagales	Orchidaceae	Platanthera	Platanthera hologlottis
Asparagales	Orchidaceae	Pogonia	Pogonia japonica
Asterales	Achillea	Crepidiastrum	Crepidiastrum sonchifolium
Asterales	Achillea	Senecio	Senecio ambraceus
Asterales	Achillea	Zinnia	Zinnia peruviana
Asterales	Campanulaceae	Adenophora	Adenophora trachelioides
Asterales	Campanulaceae	Lobelia	Lobelia chinensis
Asterales	Campanulaceae	Lobelia	Lobelia sessilifolia
Asterales	Campanulaceae	Adenophora	Adenophora divaricata
Asteranae	Caprifoliaceae	Dipsacus	Dipsacus japonicus
Asteranae	Orobanchaceae	Orobanche	Orobanche pycnostachya
Boraginales	Boraginaceae	Lithospermum	Lithospermum arvense
Boraginales	Boraginaceae	Lithospermum	Lithospermum zollingeri
Boraginales	Boraginaceae	Thyrocarpus	Thyrocarpus glochidiatus
Boraginales	Boraginaceae	Bothriospermum	Bothriospermum chinense
Boraginales	Boraginaceae	Bothriospermum	Bothriospermum secundum
Boraginales	Boraginaceae	Lappula	Lappula myosotis
Boraginales	Boraginaceae	Lithospermum	Lithospermum erythrorhizon
Brassicales	Tropaeolaceae	Tropaeolum	Tropaeolum majus
Buxales	Buxaceae	Buxus	Buxus bodinieri
Buxales	Buxaceae	Buxus	Buxus sinica
Campanulales	Campanulaceae	Adenophora	Adenophora paniculata
Campanulales	Campanulaceae	Adenophora	Adenophora polyantha
Campanulales	Campanulaceae	Adenophora	Adenophora wawreana
Campanulales	Compositae	Ageratum	Ageratum conyzoides
Campanulales	Compositae	Ambrosia	Ambrosia artemisiifolia
Campanulales	Compositae	Anaphalis	Anaphalis sinica
Campanulales	Compositae	Artemisia	Artemisia capillaris
Campanulales	Compositae	Artemisia	Artemisia fauriei
Campanulales	Compositae	Artemisia	Artemisia igniaria
Campanulales	Compositae	Artemisia	Artemisia rubripes
Campanulales	Compositae	Artemisia	Artemisia selengensis
Campanulales	Compositae	Artemisia	Artemisia stolonifera
Campanulales	Compositae	Artemisia	Artemisia sylvatica
Campanulales	Compositae	Bidens	Bidens parviflora
Campanulales	Compositae	Carthamus	Carthamus tinctorius
Campanulales	Compositae	Centaurea	Centaurea cyanus
Campanulales	Compositae	Chorisis	Chorisis repens
Campanulales	Compositae	Chrysanthemum	Chrysanthemum segetum
Campanulales	Compositae	Cirsium	Cirsium chinense
Campanulales	Compositae	Cirsium	Cirsium japonicum
Campanulales	Compositae	Cirsium	Cirsium lineare
Campanulales	Compositae	Cirsium	Cirsium maackii
Campanulales	Compositae	Cirsium	Cirsium setosum
Campanulales	Compositae	Conyza	Conyza bonariensis
Campanulales	Compositae	Dendranthema	Dendranthema indicum
Campanulales	Compositae	Echinops	Echinops grijsii
Campanulales	Compositae	Emilia	Emilia sonchifolia
Campanulales	Compositae	Eupatorium	Eupatorium chinense
Campanulales	Compositae	Eupatorium	Eupatorium fortunei
Campanulales	Compositae	Eupatorium	Eupatorium japonicum
Campanulales	Compositae	Heteropappus	Heteropappus altaicus
Campanulales	Compositae	Heteropappus	Heteropappus hispidus
Campanulales	Compositae	Hieracium	Hieracium umbellatum
Campanulales	Compositae	Hypochaeris	Hypochaeris ciliata
Campanulales	Compositae	Ixeridium	Ixeridium chinense
Campanulales	Compositae	Ixeridium	Ixeridium sonchifolium
Campanulales	Compositae	Ixeris	Ixeris polycephala
Campanulales	Compositae	Kalimeris	Kalimeris indica
Campanulales	Compositae	Kalimeris	Kalimeris lautureana
Campanulales	Compositae	Ligularia	Ligularia stenocephala
Campanulales	Compositae	Paraixeris	Paraixeris pinnatipartita
Campanulales	Compositae	Parasenecio	Parasenecio hastatus
Campanulales	Compositae	Petasites	Petasites japonicus
Campanulales	Compositae	Pterocypsela	Pterocypsela elata
Campanulales	Compositae	Pterocypsela	Pterocypsela formosana
Campanulales	Compositae	Pterocypsela	Pterocypsela indica
Campanulales	Compositae	Pyrethrum	Pyrethrum cinerariifolium
Campanulales	Compositae	Saussurea	Saussurea mongolica
Campanulales	Compositae	Saussurea	Saussurea ussuriensis
Campanulales	Compositae	Scorzonera	Scorzonera austriaca
Campanulales	Compositae	Scorzonera	Scorzonera sinensis
Campanulales	Compositae	Senecio	Senecio nemorensis
Campanulales	Compositae	Serratula	Serratula coronata
Campanulales	Compositae	Siegesbeckia	Siegesbeckia orientalis
Campanulales	Compositae	Solidago	Solidago decurrens
Campanulales	Compositae	Sonchus	Sonchus asper
Campanulales	Compositae	Sonchus	Sonchus oleraceus
Campanulales	Compositae	Taraxacum	Taraxacum mongolicum
Campanulales	Compositae	Tripolium	Tripolium vulgare
Campanulales	Compositae	Turczaninowia	Turczaninowia fastigiata
Campanulales	Compositae	Youngia	Youngia japonica
Campanulales	Compositae	Youngia	Youngia longiflora
Campanulales	Compositae	Artemisia	Artemisia anethifolia
Campanulales	Compositae	Artemisia	Artemisia anethoides
Campanulales	Compositae	Artemisia	Artemisia angustissima
Campanulales	Compositae	Artemisia	Artemisia eriopoda
Campanulales	Compositae	Artemisia	Artemisia leucophylla
Campanulales	Compositae	Artemisia	Artemisia mongolica
Campanulales	Compositae	Artemisia	Artemisia princeps
Campanulales	Compositae	Artemisia	Artemisia sieversiana
Campanulales	Compositae	Dendranthema	Dendranthema chanetii
Campanulales	Compositae	Echinops	Echinops latifolius
Campanulales	Compositae	Erigeron	Erigeron acer
Campanulales	Compositae	Kalimeris	Kalimeris mongolica
Campanulales	Compositae	Leontopodium	Leontopodium leontopodioides
Campanulales	Compositae	Mulgedium	Mulgedium tataricum
Campanulales	Compositae	Picris	Picris hieracioides
Campanulales	Compositae	Prenanthes	Prenanthes tatarinowii
Campanulales	Compositae	Pterocypsela	Pterocypsela raddeana
Campanulales	Compositae	Scorzonera	Scorzonera divaricata
Campanulales	Compositae	Scorzonera	Scorzonera mongolica
Campanulales	Compositae	Senecio	Senecio argunensis
Campanulales	Compositae	Serratula	Serratula centauroides
Campanulales	Compositae	Serratula	Serratula chanetii
Campanulales	Compositae	Sonchus	Sonchus brachyotus
Campanulales	Compositae	Stemmacantha	Stemmacantha
Campanulales	Compositae	Taraxacum	Taraxacum borealisinense
Campanulales	Compositae	Taraxacum	Taraxacum platypecidum
Caryophyllales	Aizoaceae	Trigastrotheca	Trigastrotheca stricta
Caryophyllales	Amaranthaceae	Achyranthes	Achyranthes bidentata
Caryophyllales	Amaranthaceae	Alternanthera	Alternanthera philoxeroides
Caryophyllales	Amaranthaceae	Alternanthera	Alternanthera sessilis
Caryophyllales	Amaranthaceae	Amaranthus	Amaranthus hybridus
Caryophyllales	Amaranthaceae	Amaranthus	Amaranthus spinosus
Caryophyllales	Amaranthaceae	Amaranthus	Amaranthus viridis
Caryophyllales	Amaranthaceae	Chenopodium	Chenopodium gracilispicum
Caryophyllales	Amaranthaceae	Amaranthus	Amaranthus roxburghianus
Caryophyllales	Chenopodiaceae	Chenopodium	Chenopodium hybridum
Caryophyllales	Chenopodiaceae	Salsola	Salsola komarovii
Caryophyllales	Chenopodiaceae	Suaeda	Suaeda glauca
Caryophyllales	Chenopodiaceae	Suaeda	Suaeda salsa
Caryophyllales	Polygonaceae	Antenoron	Antenoron filiforme
Caryophyllales	Polygonaceae	Fagopyrum	Fagopyrum dibotrys
Caryophyllales	Polygonaceae	Fallopia	Fallopia convolvulus
Caryophyllales	Polygonaceae	Fallopia	Fallopia dentatoalata
Caryophyllales	Polygonaceae	Fallopia	Fallopia dumetorum
Caryophyllales	Polygonaceae	Fallopia	Fallopia multiflora
Caryophyllales	Polygonaceae	Polygonum	Polygonum alpinum
Caryophyllales	Polygonaceae	Polygonum	Polygonum bungeanum
Caryophyllales	Polygonaceae	Polygonum	Polygonum chinense
Caryophyllales	Polygonaceae	Polygonum	Polygonum dissitiflorum
Caryophyllales	Polygonaceae	Polygonum	Polygonum divaricatum
Caryophyllales	Polygonaceae	Polygonum	Polygonum jucundum
Caryophyllales	Polygonaceae	Polygonum	Polygonum muricatum
Caryophyllales	Polygonaceae	Polygonum	Polygonum persicaria
Caryophyllales	Polygonaceae	Polygonum	Polygonum posumbu
Caryophyllales	Polygonaceae	Polygonum	Polygonum pubescens
Caryophyllales	Polygonaceae	Polygonum	Polygonum senticosum
Caryophyllales	Polygonaceae	Polygonum	Polygonum sibiricum
Caryophyllales	Polygonaceae	Polygonum	Polygonum taquetii
Caryophyllales	Polygonaceae	Polygonum	Polygonum viscoferum
Caryophyllales	Polygonaceae	Polygonum	Polygonum viscosum
Caryophyllales	Polygonaceae	Reynoutria	Reynoutria japonica
Caryophyllales	Polygonaceae	Rumex	Rumex acetosella
Caryophyllales	Polygonaceae	Rumex	Rumex amurensis
Caryophyllales	Polygonaceae	Rumex	Rumex chalepensis
Caryophyllales	Polygonaceae	Rumex	Rumex crispus
Caryophyllales	Polygonaceae	Rumex	Rumex dentatus
Caryophyllales	Polygonaceae	Rumex	Rumex japonicus
Caryophyllales	Polygonaceae	Rumex	Rumex longifolius
Caryophyllales	Polygonaceae	Rumex	Rumex maritimus
Caryophyllales	Polygonaceae	Rumex	Rumex obtusifolius
Caryophyllales	Polygonaceae	Rumex	Rumex patientia
Caryophyllales	Portulacaceae	Portulaca	Portulaca oleracea
Caryophyllales	Tamaricaceae	Tamarix	Tamarix austromongolica
Centrospermae	Caryophyllaceae	Cerastium	Cerastium glomeratum
Centrospermae	Caryophyllaceae	Dianthus	Dianthus longicalyx
Centrospermae	Caryophyllaceae	Lychnis	Lychnis cognata Maxim.
Centrospermae	Caryophyllaceae	Pseudostellaria	Pseudostellaria davidii
Centrospermae	Caryophyllaceae	Pseudostellaria	Pseudostellaria heterophylla
Centrospermae	Caryophyllaceae	Sagina	Sagina japonica
Centrospermae	Caryophyllaceae	Sagina	Sagina maxima
Centrospermae	Caryophyllaceae	Stellaria	Stellaria chinensis
Centrospermae	Caryophyllaceae	Stellaria	Stellaria neglecta
Centrospermae	Caryophyllaceae	Arenaria	Arenaria juncea
Centrospermae	Caryophyllaceae	Gypsophila	Gypsophila oldhamiana
Centrospermae	Caryophyllaceae	Silene	Silene fortunei
Centrospermae	Caryophyllaceae	Silene	Silene jenisseensis
Centrospermae	Caryophyllaceae	Stellaria	Stellaria palustris
Centrospermae	Celastraceae	Celastrus	Celastrus angulatus
Centrospermae	Chenopodiaceae	Chenopodium	Chenopodium urbicum
Centrospermae	Chenopodiaceae	Salicornia	Salicornia europaea
Centrospermae	Chenopodiaceae	Salsola	Salsola collina
Centrospermae	Chenopodiaceae	Salsola	Salsola ruthenica
Centrospermae	Phytolaccaceae	Phytolacca	Phytolacca americana
Centrospermae	Phytolaccaceae	Phytolacca	Phytolacca japonica
Cephalotaxales	Taxaceae	Cephalotaxus	Cephalotaxus fortunei
Chloranthales	Chloranthaceae	Chloranthus	Chloranthus fortunei
Commelinales	Commelinaceae	Commelina	Commelina bengalensis
Commelinales	Commelinaceae	Murdannia	Murdannia nudiflora
Commelinales	Commelinaceae	Murdannia	Murdannia triquetra
Commelinales	Pontederiaceae	Eichhornia	Eichhornia crassipes
Coniferales	Cupressaceae	Cryptomeria	Cryptomeria japonica
Coniferales	Cupressaceae	Cunninghamia	Cunninghamia lanceolata
Coniferales	Cupressaceae	Taxodium	Taxodium distichum
Coniferales	Pinaceae	Pinus	Pinus elliottii
Coniferales	Pinaceae	Pinus	Pinus massoniana
Coniferales	Pinaceae	Pinus	Pinus palustris
Coniferales	Pinaceae	Pinus	Pinus taeda
Coniferales	Pinaceae	Pinus	Pinus taiwanensis
Coniferales	Pinaceae	Pseudolarix	Pseudolarix amabilis
Coniferales	Pinaceae	Tsuga	Tsuga chinensis
Coniferales	Sciadopityaceae	Sciadopitys	Sciadopitys verticillata
Contortae	Loganiaceae	Buddleja	Buddleja davidii
Contortae	Loganiaceae	Buddleja	Buddleja lindleyana
Contortae	Loganiaceae	Mitrasacme	Mitrasacme indica
Contortae	Loganiaceae	Mitrasacme	Mitrasacme pygmaea
Contortae	Loganiaceae	Buddleja	Buddleja alternifolia
Contortae	Loganiaceae	Buddleja	Buddleja officinalis
Contortae	Oleaceae	Forsythia	Forsythia viridissima
Contortae	Oleaceae	Jasminum	Jasminum sambac
Contortae	Oleaceae	Ligustrum	Ligustrum lucidum
Contortae	Oleaceae	Ligustrum	Ligustrum obtusifolium
Contortae	Oleaceae	Ligustrum	Ligustrum quihoui
Contortae	Oleaceae	Ligustrum	Ligustrum sinense
Contortae	Oleaceae	Fraxinus	Fraxinus bungeana
Contortae	Oleaceae	Fraxinus	Fraxinus mandschurica
Contortae	Oleaceae	Jasminum	Jasminum floridum
Contortae	Oleaceae	Syringa	Syringa pubescens
Cornales	Alangiaceae	Alangium	Alangium chinense
Cornales	Hydrangeaceae	Deutzia	Deutzia crenata
Cornales	Hydrangeaceae	Deutzia	Deutzia grandiflora
Cornales	Hydrangeaceae	Deutzia	Deutzia parviflora
Cornales	Hydrangeaceae	Dichroa	Dichroa febrifuga
Cornales	Hydrangeaceae	Hydrangea	Hydrangea paniculata
Cornales	Hydrangeaceae	Philadelphus	Philadelphus brachybotrys
Cucurbitales	Cucurbitaceae	Momordica	Momordica charantia
Cucurbitales	Cucurbitaceae	Zehneria	Zehneria japonica
Cucurbitales	Cucurbitaceae	Bolbostemma	Bolbostemma paniculatum
Cucurbitales	Cucurbitaceae	Thladiantha	Thladiantha dubia
Cycadales	Cycadaceae	Cycas	Cycas revoluta
Cyperales	Cyperaceae	Bulbostylis	Bulbostylis barbata
Cyperales	Cyperaceae	Bulbostylis	Bulbostylis densa
Cyperales	Cyperaceae	Carex	Carex leiorhyncha
Cyperales	Cyperaceae	Carex	Carex pumila
Cyperales	Cyperaceae	Carex	Carex capillacea
Cyperales	Cyperaceae	Carex	Carex dimorpholepis
Cyperales	Cyperaceae	Carex	Carex duriuscula
Cyperales	Cyperaceae	Carex	Carex heterolepis
Cyperales	Cyperaceae	Carex	Carex heterostachya
Cyperales	Cyperaceae	Carex	Carex japonica
Cyperales	Cyperaceae	Carex	Carex kobomugi
Cyperales	Cyperaceae	Cyperus	Cyperus amuricus
Cyperales	Cyperaceae	Cyperus	Cyperus compressus
Cyperales	Cyperaceae	Cyperus	Cyperus michelianus
Cyperales	Cyperaceae	Cyperus	Cyperus nipponicus
Dioscoreales	Dioscoreaceae	Dioscorea	Dioscorea nipponica
Dioscoreales	Dioscoreaceae	Dioscorea	Dioscorea tenuipes
Dipsacales	Adoxaceae	Adoxa	Adoxa moschatellina
Dipsacales	Caprifoliaceae	Patrinia	Patrinia heterophylla
Ephedrales	Ephedraceae	Ephedra	Ephedra equisetina
Ephedrales	Ephedraceae	Ephedra	Ephedra intermedia
Ericales	Actinidiaceae	Actinidia	Actinidia polygama
Ericales	Actinidiaceae	Actinidia	Actinidia kolomikta
Ericales	Balsaminaceae	Impatiens	Impatiens noli-tangere
Ericales	Ebenaceae	Diospyros	Diospyros kaki
Ericales	Ebenaceae	Diospyros	Diospyros lotus
Ericales	Ebenaceae	Diospyros	Diospyros rhombifolia
Ericales	Ericaceae	Rhododendron	Rhododendron pulchrum
Ericales	Ericaceae	Rhododendron	Rhododendron micranthum
Ericales	Ericaceae	Rhododendron	Rhododendron mucronulatum
Ericales	Ericaceae	Rhododendron	Rhododendron obtusum
Ericales	Ericaceae	Rhododendron	Rhododendron simsii
Ericales	Primulaceae	Lysimachia	Lysimachia candida
Ericales	Primulaceae	Lysimachia	Lysimachia clethroides
Ericales	Primulaceae	Lysimachia	Lysimachia davurica
Ericales	Primulaceae	Lysimachia	Lysimachia klattiana
Ericales	Primulaceae	Lysimachia	Lysimachia mauritiana
Ericales	Primulaceae	Lysimachia	Lysimachia parvifolia
Ericales	Primulaceae	Glaux	Glaux maritima
Ericales	Pyrolaceae	Pyrola	Pyrola calliantha
Ericales	Styracaceae	Styrax	Styrax confusus
Ericales	Styracaceae	Styrax	Styrax faberi
Ericales	Styracaceae	Styrax	Styrax japonicus
Ericales	Styracaceae	Styrax	Styrax obassia
Ericales	Symplocaceae	Symplocos	Symplocos paniculata
Fagales	Betulaceae	Alnus	Alnus japonica
Fagales	Betulaceae	Alnus	Alnus trabeculosa
Fagales	Betulaceae	Betula	Betula chinensis
Fagales	Betulaceae	Betula	Betula dahurica
Fagales	Betulaceae	Betula	Betula platyphylla
Fagales	Betulaceae	Betula	Betula utilis
Fagales	Betulaceae	Corylus	Corylus mandshurica
Gentianales	Apocynaceae	Apocynum	Apocynum venetum
Gentianales	Apocynaceae	Catharanthus	Catharanthus roseus
Gentianales	Apocynaceae	Cynanchum	Cynanchum amplexicaule
Gentianales	Apocynaceae	Cynanchum	Cynanchum atratum
Gentianales	Apocynaceae	Cynanchum	Cynanchum bungei
Gentianales	Apocynaceae	Cynanchum	Cynanchum inamoenum
Gentianales	Apocynaceae	Cynanchum	Cynanchum thesioides
Gentianales	Apocynaceae	Trachelospermum	Trachelospermum jasminoides
Gentianales	Apocynaceae	Vinca	Vinca major
Gentianales	Gentianaceae	Gentiana	Gentiana dahurica
Gentianales	Gentianaceae	Gentiana	Gentiana manshurica
Gentianales	Gentianaceae	Gentiana	Gentiana yokusai
Gentianales	Gentianaceae	Nymphoides	Nymphoides indica
Gentianales	Gentianaceae	Swertia	Swertia diluta
Gentianales	Gentianaceae	Swertia	Swertia pseudochinensis
Gentianales	Rubiaceae	Galium	Galium aparine
Gentianales	Rubiaceae	Paederia	Paederia scandens
Gentianales	Rubiaceae	Rubia	Rubia argyi
Gentianales	Rubiaceae	Rubia	Rubia chinensis
Gentianales	Rubiaceae	Galium	Galium boreale
Gentianales	Rubiaceae	Galium	Galium tricorne
Geraniales	Geraniaceae	Erodium	Erodium cicutarium
Geraniales	Geraniaceae	Geranium	Geranium carolinianum
Geraniales	Geraniaceae	Erodium	Erodium stephanianum
Geraniales	Geraniaceae	Geranium	Geranium sibiricum
Geraniales	Geraniaceae	Geranium	Geranium wlassowianum
Geraniales	Linaceae	Linum	Linum stelleroides
Geraniales	Oxalidaceae	Oxalis	Oxalis bowiei
Ginkgoales	Ginkgoaceae	Ginkgo	Ginkgo biloba
Graminales	Gramineae	Zoysia	Zoysia sinica
Graminales	Poaceae	Cortaderia	Cortaderia selloana
Graminales	Poaceae	Muhlenbergia	Muhlenbergia japonica
Graminales	Poaceae	Phyllostachys	Phyllostachys aureosulcata
Juglandales	Juglandaceae	Juglans	Juglans mandshurica
Juglandales	Juglandaceae	Platycarya	Platycarya strobilacea
Lamiales	Bignoniaceae	Catalpa	Catalpa fargesii
Lamiales	Bignoniaceae	Incarvillea	Incarvillea sinensis
Lamiales	Bignoniaceae	Campsis	Campsis grandiflora
Lamiales	Gesneriaceae	Boea	Boea hygrometrica
Lamiales	Labiatae	Ajuga	Ajuga nipponensis
Lamiales	Labiatae	Clinopodium	Clinopodium chinense
Lamiales	Labiatae	Clinopodium	Clinopodium polycephalum
Lamiales	Labiatae	Elsholtzia	Elsholtzia argyi
Lamiales	Labiatae	Elsholtzia	Elsholtzia splendens
Lamiales	Labiatae	Glechoma	Glechoma longituba
Lamiales	Labiatae	Lamium	Lamium amplexicaule
Lamiales	Labiatae	Lycopus	Lycopus lucidus var. hirtus
Lamiales	Labiatae	Mosla	Mosla chinensis
Lamiales	Labiatae	Mosla	Mosla dianthera
Lamiales	Labiatae	Mosla	Mosla scabra
Lamiales	Labiatae	Prunella	Prunella asiatica
Lamiales	Labiatae	Salvia	Salvia chinensis
Lamiales	Labiatae	Scutellaria	Scutellaria barbata
Lamiales	Labiatae	Scutellaria	Scutellaria indica
Lamiales	Labiatae	Scutellaria	Scutellaria pekinensis
Lamiales	Labiatae	Scutellaria	Scutellaria strigillosa
Lamiales	Lamiaceae	Callicarpa	Callicarpa bodinieri
Lamiales	Lamiaceae	Callicarpa	Callicarpa dichotoma
Lamiales	Lamiaceae	Callicarpa	Callicarpa giraldii
Lamiales	Lamiaceae	Callicarpa	Callicarpa japonica
Lamiales	Lamiaceae	Callicarpa	Callicarpa rubella
Lamiales	Lamiaceae	Caryopteris	Caryopteris mongholica
Lamiales	Lamiaceae	Clerodendrum	Clerodendrum bungei
Lamiales	Lamiaceae	Vitex	Vitex trifolia
Lamiales	Linderniaceae	Lindernia	Lindernia crustacea
Lamiales	Linderniaceae	Lindernia	Lindernia procumbens
Lamiales	Orobanchaceae	Centranthera	Centranthera cochinchinensis
Lamiales	Orobanchaceae	Pedicularis	Pedicularis resupinata
Lamiales	Paulowniaceae	Paulownia	Paulownia catalpifolia
Lamiales	Paulowniaceae	Paulownia	Paulownia elongata
Lamiales	Paulowniaceae	Paulownia	Paulownia fortunei
Lamiales	Paulowniaceae	Paulownia	Paulownia tomentosa
Lamiales	Phrymaceae	Mimulus	Mimulus tenellus
Lamiales	Plantaginaceae	Linaria	Linaria vulgaris
Lamiales	Plantaginaceae	Veronica	Veronica anagallisaquatica
Lamiales	Plantaginaceae	Veronica	Veronica arvensis
Lamiales	Plantaginaceae	Veronica	Veronica peregrina
Lamiales	Plantaginaceae	Veronica	Veronica persica
Lamiales	Plantaginaceae	Veronicastrum	Veronicastrum sibiricum
Lamiales	Plantaginaceae	Plantago	Plantago virginica
Lamiales	Scrophulariaceae	Scrophularia	Scrophularia buergeriana
Lamiales	Verbenaceae	Verbena	Verbena officinalis
Laurales	Calycanthaceae	Chimonanthus	Chimonanthus praecox
Liliflorae	Iridaceae	Iris	Iris dichotoma
Liliflorae	Iridaceae	Iris	Iris japonica
Liliflorae	Iridaceae	Iris	Iris ruthenica
Liliflorae	Iridaceae	Iris	Iris tectorum
Liliflorae	Juncaceae	Juncus	Juncus alatus
Liliflorae	Juncaceae	Juncus	Juncus bufonius
Liliflorae	Juncaceae	Juncus	Juncus diastrophanthus
Liliflorae	Juncaceae	Juncus	Juncus effusus
Liliflorae	Juncaceae	Juncus	Juncus papillosus
Liliflorae	Juncaceae	Juncus	Juncus setchuensis
Liliflorae	Juncaceae	Juncus	Juncus taonanensis
Liliflorae	Juncaceae	Juncus	Juncus tenuis
Liliflorae	Juncaceae	Juncus	Juncus articulatus
Liliflorae	Liliaceae	Aletris	Aletris spicata
Liliflorae	Liliaceae	Allium	Allium chinense
Liliflorae	Liliaceae	Allium	Allium prattii
Liliflorae	Liliaceae	Allium	Allium tenuissimum
Liliflorae	Liliaceae	Allium	Allium victorialis
Liliflorae	Liliaceae	Asparagus	Asparagus cochinchinensis
Liliflorae	Liliaceae	Asparagus	Asparagus longiflorus
Liliflorae	Liliaceae	Asparagus	Asparagus oligoclonos
Liliflorae	Liliaceae	Convallaria	Convallaria majalis
Liliflorae	Liliaceae	Hemerocallis	Hemerocallis citrina
Liliflorae	Liliaceae	Hosta	Hosta plantaginea
Liliflorae	Liliaceae	Hosta	Hosta ventricosa
Liliflorae	Liliaceae	Lilium	Lilium lancifolium
Liliflorae	Liliaceae	Lilium	Lilium tsingtauense
Liliflorae	Liliaceae	Liriope	Liriope graminifolia
Liliflorae	Liliaceae	Ophiopogon	Ophiopogon japonicus
Liliflorae	Liliaceae	Reineckia	Reineckia carnea
Liliflorae	Liliaceae	Rohdea	Rohdea japonica
Liliflorae	Liliaceae	Smilax	Smilax china
Liliflorae	Liliaceae	Smilax	Smilax nipponica
Liliflorae	Liliaceae	Smilax	Smilax riparia
Liliflorae	Liliaceae	Smilax	Smilax sieboldii
Liliflorae	Liliaceae	smilax	Smilax stans
Liliflorae	Liliaceae	Tulipa	Tulipa edulis
Liliflorae	Liliaceae	Allium	Allium anisopodium
Liliflorae	Liliaceae	Allium	Allium condensatum
Liliflorae	Liliaceae	Allium	Allium ramosum
Liliflorae	Liliaceae	Allium	Allium senescens
Liliflorae	Liliaceae	Allium	Allium thunbergii
Liliflorae	Liliaceae	Anemarrhena	Anemarrhena asphodeloides
Liliflorae	Liliaceae	Asparagus	Asparagus brachyphyllus
Liliflorae	Liliaceae	Asparagus	Asparagus dauricus
Liliflorae	Liliaceae	Asparagus	Asparagus schoberioides
Liliflorae	Liliaceae	Asparagus	Asparagus trichophyllus
Liliflorae	Liliaceae	Clintonia	Clintonia udensis
Liliflorae	Liliaceae	Hemerocallis	Hemerocallis esculenta
Liliflorae	Liliaceae	Hemerocallis	Hemerocallis lilioasphodelus
Liliflorae	Liliaceae	Hemerocallis	Hemerocallis minor
Liliflorae	Liliaceae	Lilium	Lilium concolor
Liliflorae	Liliaceae	Lilium	Lilium pumilum
Liliflorae	Liliaceae	Polygonatum	Polygonatum involucratum
Liliflorae	Liliaceae	Polygonatum	Polygonatum macropodium
Liliflorae	Liliaceae	Veratrum	Veratrum nigrum
Malpighiales	Euphorbiaceae	Alchornea	Alchornea davidii
Malpighiales	Euphorbiaceae	Euphorbia	Euphorbia cyathophora
Malpighiales	Euphorbiaceae	Euphorbia	Euphorbia helioscopia
Malpighiales	Euphorbiaceae	Euphorbia	Euphorbia heterophylla
Malpighiales	Euphorbiaceae	Euphorbia	Euphorbia hypericifolia
Malpighiales	Euphorbiaceae	Euphorbia	Euphorbia maculata
Malpighiales	Euphorbiaceae	Euphorbia	Euphorbia makinoi
Malpighiales	Euphorbiaceae	Euphorbia	Euphorbia marginata
Malpighiales	Euphorbiaceae	Euphorbia	Euphorbia pulcherrima
Malpighiales	Euphorbiaceae	Euphorbia	Euphorbia thymifolia
Malpighiales	Euphorbiaceae	Speranskia	Speranskia tuberculata
Malpighiales	Euphorbiaceae	Triadica	Sapium japonicum
Malpighiales	Euphorbiaceae	Triadica	Sapium sebiferum
Malpighiales	Euphorbiaceae	Vernicia	Vernicia fordii
Malpighiales	Flacourtiaceae	Poliothyrsis	Poliothyrsis sinensis
Malpighiales	Phyllanthaceae	Antidesma	Antidesma japonicum
Malpighiales	Phyllanthaceae	Bischofia	Bischofia polycarpa
Malpighiales	Phyllanthaceae	Flueggea	Flueggea virosa
Malpighiales	Phyllanthaceae	Glochidion	Glochidion puberum
Malpighiales	Phyllanthaceae	Phyllanthus	Phyllanthus urinaria
Malpighiales	Phyllanthaceae	Phyllanthus	Phyllanthus ussuriensis
Malpighiales	Salicaceae	Populus	Populus cathayana
Malpighiales	Salicaceae	Populus	Populus nigra
Malpighiales	Salicaceae	Populus	Populus simonii
Malpighiales	Salicaceae	Salix	Salix rosthornii
Malpighiales	Salicaceae	Salix	Salix suchowensis
Malpighiales	Salicaceae	Salix	Salix wilsonii
Malpighiales	Salicaceae	Salix	Salix koreensis
Malpighiales	Salicaceae	Populus	Populus alba
Malpighiales	Salicaceae	Populus	Populus davidiana
Malpighiales	Salicaceae	Salix	Salix taishanensis
Malpighiales	Violaceae	Viola	Viola biflora
Malpighiales	Violaceae	Viola	Viola chaerophylloides
Malpighiales	Violaceae	Viola	Viola dissecta
Malpighiales	Violaceae	Viola	Viola hancockii
Malpighiales	Violaceae	Viola	Viola inconspicua
Malpighiales	Violaceae	Viola	Viola mandshurica
Malpighiales	Violaceae	Viola	Viola monbeigii
Malpighiales	Violaceae	Viola	Viola mongolica
Malpighiales	Violaceae	Viola	Viola odorata
Malpighiales	Violaceae	Viola	Viola pekinensis
Malpighiales	Violaceae	Viola	Viola phalacrocarpa
Malpighiales	Violaceae	Viola	Viola prionantha
Malpighiales	Violaceae	Viola	Viola rossii
Malpighiales	Violaceae	Viola	Viola selkirkii
Malpighiales	Violaceae	Viola	Viola tenuicornis
Malpighiales	Violaceae	Viola	Viola verecunda
Malvales	Malvaceae	Abelmoschus	Abelmoschus esculentus
Malvales	Malvaceae	Abutilon	Abutilon striatum
Malvales	Malvaceae	Corchoropsis	Corchoropsis psilocarpa
Malvales	Malvaceae	Corchorus	Corchorus aestuans
Malvales	Malvaceae	Corchorus	Corchorus capsularis
Malvales	Malvaceae	Hibiscus	Hibiscus moscheutos
Malvales	Malvaceae	Hibiscus	Hibiscus mutabilis
Malvales	Malvaceae	Malva	Malva verticillata
Malvales	Malvaceae	Melochia	Melochia corchorifolia
Malvales	Malvaceae	Tilia	Tilia japonica
Malvales	Malvaceae	Tilia	Tilia mandshurica
Malvales	Malvaceae	Tilia	Tilia miqueliana
Malvales	Malvaceae	Tilia	Tilia mongolica
Malvales	Malvaceae	Tilia	Tilia paucicostata
Malvales	Malvaceae	Tilia	Tilia tuan
Malvales	Malvaceae	Malva	Malva rotundifolia
Malvales	Thymelaeaceae	Daphne	Daphne genkwa
Malvales	Thymelaeaceae	Edgeworthia	Edgeworthia chrysantha
Malvales	Thymelaeaceae	Diarthron	Diarthron linifolium
Malvales	Thymelaeaceae	Wikstroemia	Wikstroemia chamaedaphne
Malvales	Tiliaceae	Tilia	Tilia amurensis
Microspermae	Orchidaceae	Amitostigma	Amitostigma gracile
Microspermae	Orchidaceae	Cleisostoma	Cleisostoma scolopendrifolium
Microspermae	Orchidaceae	Cypripedium	Cypripedium guttatum
Microspermae	Orchidaceae	Epipactis	Epipactis helleborine
Microspermae	Orchidaceae	Herminium	Herminium monorchis
Microspermae	Orchidaceae	Liparis	Liparis japonica
Microspermae	Orchidaceae	Platanthera	Platanthera metabifolia
Microspermae	Orchidaceae	Gastrodia	Gastrodia elata
Myrtales	Lythraceae	Trapa	Trapa bispinosa
Myrtales	Lythraceae	Trapa	Trapa japonica
Myrtiflorae	Haloragidaceae	Myriophyllum	Myriophyllum verticillatum
Myrtiflorae	Lythraceae	Ammannia	Ammannia arenaria
Myrtiflorae	Lythraceae	Ammannia	Ammannia baccifera
Myrtiflorae	Lythraceae	Lagerstroemia	Lagerstroemia subcostata
Myrtiflorae	Lythraceae	Lythrum	Lythrum anceps
Myrtiflorae	Lythraceae	Rotala	Rotala indica
Myrtiflorae	Lythraceae	Rotala	Rotala mexicana
Myrtiflorae	Najadaceae	Najas	Najas minor
Myrtiflorae	Nyssaceae	Camptotheca	Camptotheca acuminata
Myrtiflorae	Nyssaceae	Nyssa	Nyssa sinensis
Myrtiflorae	Onagraceae	Circaea	Circaea alpina
Myrtiflorae	Onagraceae	Circaea	Circaea cordata
Myrtiflorae	Onagraceae	Circaea	Circaea mollis
Myrtiflorae	Onagraceae	Epilobium	Epilobium fastigiatoramosum
Myrtiflorae	Onagraceae	Epilobium	Epilobium hirsutum
Myrtiflorae	Onagraceae	Epilobium	Epilobium pyrricholophum
Myrtiflorae	Onagraceae	Gaura	Gaura lindheimeri
Myrtiflorae	Onagraceae	Gaura	Gaura parviflora
Myrtiflorae	Onagraceae	Ludwigia	Ludwigia epilobioides
Oxalidales	Oxalidaceae	Oxalis	Oxalis corymbosa
Pandanales	Stemonaceae	Stemona	Stemona sessilifolia
Parietales	Actinidiaceae	Actinidia	Actinidia arguta
Parietales	Guttiferae	Hypericum	Hypericum perforatum
Parietales	Guttiferae	Hypericum	Hypericum japonicum
Parietales	Guttiferae	Hypericum	Hypericum monogynum
Parietales	Guttiferae	Hypericum	Hypericum patulum
Parietales	Theaceae	Camellia	Camellia oleifera
Parietales	Theaceae	Camellia	Camellia sinensis
Parietales	Theaceae	Ternstroemia	Ternstroemia gymnanthera
Parietales	Theaceae	Ternstroemia	Ternstroemia nitida
Pinales	Cupressaceae	Chamaecyparis	Chamaecyparis obtusa
Pinales	Cupressaceae	Chamaecyparis	Chamaecyparis pisifera
Pinales	Cupressaceae	Cupressus	Cupressus funebris
Pinales	Cupressaceae	Juniperus	Juniperus formosana
Pinales	Cupressaceae	Juniperus	Juniperus rigida
Pinales	Cupressaceae	Thuja	Thuja occidentalis
Pinales	Cupressaceae	Thuja	Thuja standishii
Pinales	Cupressaceae	Thujopsis	Thujopsis dolabrata
Pinales	Cupressaceae	Metasequoia	Metasequoia glyptostroboides
Pinales	Papaveraceae	Pinus	Pinus banksiana
Pinales	Papaveraceae	Pinus	Pinus strobus
Pinales	Papaveraceae	Pinus	Pinus thunbergii
Pinales	Pinaceae	Cedrus	Cedrus deodara
Pinales	Pinaceae	Larix	Larix gmelinii
Pinales	Pinaceae	Larix	Larix kaempferi
Pinales	Pinaceae	Picea	Picea meyeri
Pinales	Pinaceae	Picea	Picea wilsonii
Pinales	Pinaceae	Pinus	Pinus koraiensis
Pinales	Pinaceae	Abies	Abies firma
Piperales	Aristolochiaceae	Aristolochia	Aristolochia debilis
Piperales	Aristolochiaceae	Aristolochia	Aristolochia mollissima
Piperales	Aristolochiaceae	Asarum	Asarum sieboldii
Piperales	Chloranthaceae	Chloranthus	Chloranthus serratus
Piperales	Chloranthaceae	Chloranthus	Chloranthus japonicus
Piperales	Saururaceae	Houttuynia	Houttuynia cordata
Plumbaginales	Plumbaginaceae	Limonium	Limonium bicolor
Plumbaginales	Plumbaginaceae	Limonium	Limonium sinense
Poales	Cyperaceae	Bolboschoenus	Bolboschoenus planiculmis
Poales	Cyperaceae	Bolboschoenus	Bolboschoenus yagara
Poales	Cyperaceae	Carex	Carex raddei
Poales	Cyperaceae	Fimbristylis	Fimbristylis bisumbellata
Poales	Cyperaceae	Fimbristylis	Fimbristylis complanata
Poales	Cyperaceae	Fimbristylis	Fimbristylis miliacea
Poales	Cyperaceae	Fimbristylis	Fimbristylis stauntonii
Poales	Cyperaceae	Fimbristylis	Fimbristylis subbispicata
Poales	Cyperaceae	Kyllinga	Kyllinga brevifolia
Poales	Cyperaceae	Pycreus	Pycreus flavidus
Poales	Cyperaceae	Pycreus	Pycreus sanguinolentus
Poales	Cyperaceae	Scirpus	Scirpus karuisawensis
Poales	Cyperaceae	Carex	Carex forficula
Poales	Eriocaulaceae	Eriocaulon	Eriocaulon decemflorum
Poales	Gramineae	Achnatherum	Achnatherum sibiricum
Poales	Gramineae	Agrostis	Agrostis clavata
Poales	Gramineae	Bromus	Bromus catharticus
Poales	Gramineae	Deyeuxia	Deyeuxia arundinacea var. robusta
Poales	Gramineae	Elymus	Elymus nutans
Poales	Gramineae	Eriochloa	Eriochloa villosa
Poales	Gramineae	Festuca	Festuca extremiorientalis
Poales	Gramineae	Glyceria	Glyceria leptolepis
Poales	Gramineae	Lolium	Lolium multiflorum
Poales	Gramineae	Phleum	Phleum pratense
Poales	Gramineae	Poa	Poa compressa
Poales	Gramineae	Puccinellia	Puccinellia manchuriensis
Poales	Gramineae	Roegneria	Roegneria mayebarana
Poales	Gramineae	Secale	Secale cereale
Poales	Gramineae	Aeluropus	Aeluropus sinensis
Poales	Gramineae	Agrostis	Agrostis gigantea
Poales	Gramineae	Alopecurus	Alopecurus japonicus
Poales	Gramineae	Aristida	Aristida adscensionis
Poales	Gramineae	Arundinella	Arundinella hirta
Poales	Gramineae	Arundo	Arundo donax
Poales	Gramineae	Avena	Avena sativa
Poales	Gramineae	Bromus	Bromus inermis
Poales	Gramineae	Bromus	Bromus japonicus
Poales	Gramineae	Bromus	Bromus remotiflorus
Poales	Gramineae	Calamagrostis	Calamagrostis macrolepis
Poales	Gramineae	Calamagrostis	Calamagrostis pseudophragmites
Poales	Gramineae	Calamagrostis	Capillipedium assimile
Poales	Gramineae	Cleistogenes	Cleistogenes caespitosa
Poales	Gramineae	Cleistogenes	Cleistogenes hackelii
Poales	Gramineae	Cleistogenes	Cleistogenes hancei
Poales	Gramineae	Cleistogenes	Cleistogenes polyphylla
Poales	Gramineae	Cleistogenes	Cleistogenes squarrosa
Poales	Gramineae	Cleistogenes	Cleistogenes hackelii
Poales	Gramineae	Crypsis	Crypsis aculeata
Poales	Gramineae	Crypsis	Crypsis schoenoides
Poales	Gramineae	Cymbopogon	Cymbopogon goeringii
Poales	Gramineae	Cynodon	Cynodon dactylon
Poales	Gramineae	Dactylis	Dactylis glomerata
Poales	Gramineae	Deyeuxia	Deyeuxia arundinacea var. hirsuta
Poales	Gramineae	Deyeuxia	Deyeuxia purpurea
Poales	Gramineae	Diarrhena	Diarrhena mandshurica
Poales	Gramineae	Digitaria	Digitaria violascens
Poales	Gramineae	Digitaria	Digitaria ciliaris
Poales	Gramineae	Dimeria	Dimeria ornithopoda
Poales	Gramineae	Echinochloa	Echinochloa caudata
Poales	Gramineae	Echinochloa	Echinochloa colona
Poales	Gramineae	Echinochloa	Echinochloa crus-galli var. mitis
Poales	Gramineae	Echinochloa	Echinochloa crus-galli var. zelayensis
Poales	Gramineae	Eleusine	Eleusine coracana
Poales	Gramineae	Elymus	Elymus dahuricus
Poales	Gramineae	Elymus	Elymus ciliaris
Poales	Gramineae	Elymus	Elymus ciliaris var. hackelianus
Poales	Gramineae	Elymus	Elymus ciliaris var. lasiophyllus
Poales	Gramineae	Elymus	Elymus ciliaris var. submuticus
Poales	Gramineae	Elymus	Elymus kamoji
Poales	Gramineae	Eragrostis	Eragrostis autumnalis
Poales	Gramineae	Eragrostis	Eragrostis japonica
Poales	Gramineae	Eulalia	Eulalia speciosa
Poales	Gramineae	Festuca	Festuca ovina
Poales	Gramineae	Festuca	Festuca parvigluma
Poales	Gramineae	Hordeum	Hordeum vulgare
Poales	Gramineae	Indocalamus	Indocalamus latifolius
Poales	Gramineae	Isachne	Isachne pulchella
Poales	Gramineae	Leersia	Leersia japonica
Poales	Gramineae	Leersia	Leersia sayanuka
Poales	Gramineae	Leptochloa	Leptochloa chinensis
Poales	Gramineae	Leptochloa	Leptochloa panicea
Poales	Gramineae	Leptochloa	Leptochloa fusca
Poales	Gramineae	Leymus	Leymus chinensis
Poales	Gramineae	Lolium	Lolium temulentum
Poales	Gramineae	Lophatherum	Lophatherum gracile
Poales	Gramineae	Melica	Melica grandiflora
Poales	Gramineae	Melica	Melica radula
Poales	Gramineae	Melica	Melica scabrosa
Poales	Gramineae	Microstegium	Microstegium vimineum
Poales	Gramineae	Miscanthus	Miscanthus sinensis
Poales	Gramineae	Miscanthus	Miscanthus sacchariflorus
Poales	Gramineae	Muhlenbergia	Muhlenbergia ramosa
Poales	Gramineae	Muhlenbergia	Muhlenbergia huegelii
Poales	Gramineae	Oplismenus	Oplismenus undulatifolius
Poales	Gramineae	Panicum	Panicum bisulcatum
Poales	Gramineae	Paspalum	Paspalum thunbergii
Poales	Gramineae	Paspalum	Paspalum scrobiculatum
Poales	Gramineae	Phacelurus	Phacelurus latifolius
Poales	Gramineae	Phleum	Phleum paniculatum
Poales	Gramineae	Phyllostachys	Phyllostachys glauca
Poales	Gramineae	Phyllostachys	Phyllostachys sulphurea
Poales	Gramineae	Phyllostachys	Phyllostachys edulis
Poales	Gramineae	Phyllostachys	Phyllostachys sulphurea
Poales	Gramineae	Poa	Poa acroleuca
Poales	Gramineae	Poa	Poa annua
Poales	Gramineae	Poa	Poa faberi
Poales	Gramineae	Poa	Poa pratensis
Poales	Gramineae	Polypogon	Polypogon fugax
Poales	Gramineae	Polypogon	Polypogon monspeliensis
Poales	Gramineae	Puccinellia	Puccinellia chinampoensis
Poales	Gramineae	Puccinellia	Puccinellia distans
Poales	Gramineae	Puccinellia	Puccinellia hauptiana
Poales	Gramineae	Puccinellia	Puccinellia tenuiflora
Poales	Gramineae	Roegneria	Achnatherum pekinense
Poales	Gramineae	Roegneria	Roegneria japonensis
Poales	Gramineae	Saccharum	Sacciolepis indica
Poales	Gramineae	Schizachyrium	Schizachyrium brevifolium
Poales	Gramineae	Setaria	Setaria faberi
Poales	Gramineae	Sorghum	Sorghum nitidum
Poales	Gramineae	Spartina	Spartina anglica
Poales	Gramineae	Spodiopogon	Spodiopogon cotulifer
Poales	Gramineae	Sporobolus	Sporobolus fertilis
Poales	Gramineae	Stipa	Stipa bungeana
Poales	Gramineae	Tragus	Tragus mongolorum
Poales	Gramineae	Tripogon	Tripogon chinensis
Poales	Gramineae	Zizania	Zizania latifolia
Poales	Gramineae	Zoysia	Zoysia japonica
Poales	Typhaceae	Sparganium	Sparganium stoloniferum
Poales	Typhaceae	Typha	Typha angustata
Poales	Typhaceae	Typha	Typha davidiana
Poales	Typhaceae	Typha	Typha laxmannii
Poales	Typhaceae	Typha	Typha minima
Poales	Typhaceae	Typha	Typha orientalis
Podocarpales	Podocarpaceae	Podocarpus	Podocarpus macrophyllus
Primulales	Myrsinaceae	Ardisia	Ardisia crispa
Primulales	Myrsinaceae	Ardisia	Ardisia japonica
Proteales	Sabiaceae	Meliosma	Meliosma myriantha
Proteales	Sabiaceae	Meliosma	Meliosma oldhamii
Proteales	Sabiaceae	Meliosma	Meliosma parviflora
Ranales	Cabombaceae	Brasenia	Brasenia schreberi
Ranales	Ceratophyllaceae	Ceratophyllum	Ceratophyllum demersum
Ranales	Lardizabalaceae	Akebia	Akebia quinata
Ranales	Lardizabalaceae	Decaisnea	Decaisnea insignis
Ranales	Lardizabalaceae	Stauntonia	Stauntonia leucantha
Ranales	Lauraceae	Laurus	Laurus nobilis
Ranales	Lauraceae	Lindera	Lindera angustifolia
Ranales	Lauraceae	Lindera	Lindera communis
Ranales	Lauraceae	Lindera	Lindera erythrocarpa
Ranales	Lauraceae	Lindera	Lindera glauca
Ranales	Lauraceae	Lindera	Lindera praecox
Ranales	Lauraceae	Machilus	Machilus thunbergii
Ranales	Lauraceae	Phoebe	Phoebe bournei
Ranales	Lauraceae	Sassafras	Sassafras tzumu
Ranales	Magnoliaceae	Liriodendron	Liriodendron chinense
Ranales	Magnoliaceae	Liriodendron	Liriodendron tulipifera
Ranales	Magnoliaceae	Magnolia	Magnolia cylindrica
Ranales	Magnoliaceae	Magnolia	Magnolia sieboldii
Ranales	Magnoliaceae	Schisandra	Schisandra chinensis
Ranales	Nymphaeaceae	Euryale	Euryale ferox
Ranales	Nymphaeaceae	Nelumbo	Nelumbo nucifera
Ranales	Nymphaeaceae	Nymphaea	Nymphaea alba
Ranales	Nymphaeaceae	Nymphaea	Nymphaea tetragona
Ranunculales	Berberidaceae	Berberis	Berberis amurensis
Ranunculales	Berberidaceae	Berberis	Berberis hersii
Ranunculales	Berberidaceae	Berberis	Berberis poiretii
Ranunculales	Berberidaceae	Berberis	Berberis virgetorum
Ranunculales	Berberidaceae	Mahonia	Mahonia bealei
Ranunculales	Berberidaceae	Nandina	Nandina domestica
Ranunculales	Fagaceae	Castanopsis	Castanopsis jucunda
Ranunculales	Fagaceae	Castanopsis	Castanopsis tibetana
Ranunculales	Fagaceae	Lithocarpus	Lithocarpus glaber
Ranunculales	Fagaceae	Quercus	Quercus acutissima
Ranunculales	Fagaceae	Quercus	Quercus serrata
Ranunculales	Fagaceae	Quercus	Quercus baronii
Ranunculales	Fagaceae	Quercus	Quercus mongolica
Ranunculales	Ranunculaceae	Aconitum	Aconitum kusnezoffii
Ranunculales	Ranunculaceae	Aquilegia	Aquilegia viridiflora
Ranunculales	Ranunculaceae	Aquilegia	Aquilegia yabeana
Ranunculales	Ranunculaceae	Cimicifuga	Cimicifuga dahurica
Ranunculales	Ranunculaceae	Cimicifuga	Cimicifuga foetida
Ranunculales	Ranunculaceae	Clematis	Clematis hexapetala
Ranunculales	Ranunculaceae	Clematis	Clematis kirilowii
Ranunculales	Ranunculaceae	Thalictrum	Thalictrum foeniculaceum
Ranunculales	Ranunculaceae	Thalictrum	Thalictrum simplex
Ranunculales	Ranunculaceae	Thalictrum	Thalictrum squarrosum
Ranunculales	Ranunculaceae	Aconitum	Aconitum carmichaeli
Ranunculales	Ranunculaceae	Clematis	Clematis chinensis
Ranunculales	Ranunculaceae	Coptis	Coptis chinensis
Ranunculales	Ranunculaceae	Ranunculus	Ranunculus ternatus
Ranunculales	Ranunculaceae	Semiaquilegia	Semiaquilegia adoxoides
Ranunculales	Ranunculaceae	Thalictrum	Thalictrum aquilegifolium
Ranunculales	Ranunculaceae	Thalictrum	Thalictrum ichangense
Ranunculales	Ranunculaceae	Thalictrum	Thalictrum petaloideum
Rhoeadales	Papaveraceae	Corydalis	Corydalis balansae
Rhoeadales	Papaveraceae	Corydalis	Corydalis bungeana
Rhoeadales	Papaveraceae	Corydalis	Corydalis caudata
Rhoeadales	Papaveraceae	Corydalis	Corydalis edulis
Rhoeadales	Papaveraceae	Corydalis	Corydalis raddeana
Rhoeadales	Papaveraceae	Corydalis	Corydalis speciosa
Rhoeadales	Papaveraceae	Corydalis	Corydalis yanhusuo
Rhoeadales	Papaveraceae	Dicranostigma	Dicranostigma leptopodum
Rhoeadales	Papaveraceae	Hypecoum	Hypecoum erectum
Rhoeadales	Papaveraceae	Macleaya	Macleaya microcarpa
Rosales	Cannabaceae	Aphananthe	Aphananthe aspera
Rosales	Cannabaceae	Celtis	Celtis julianae
Rosales	Cannabaceae	Celtis	Celtis koraiensis
Rosales	Cannabaceae	Celtis	Celtis sinensis
Rosales	Crassulaceae	Hylotelephium	Hylotelephium spectabile
Rosales	Crassulaceae	Sedum	Sedum stellariifolium
Rosales	Crassulaceae	Hylotelephium	Hylotelephium verticillatum
Rosales	Crassulaceae	Sedum	Sedum polytrichoides
Rosales	Elaeagnaceae	Elaeagnus	Elaeagnus angustifolia
Rosales	Elaeagnaceae	Elaeagnus	Elaeagnus macrophylla
Rosales	Elaeagnaceae	Elaeagnus	Elaeagnus multiflora
Rosales	Elaeagnaceae	Elaeagnus	Elaeagnus pungens
Rosales	Hamamelidaceae	Fortunearia	Fortunearia sinensis
Rosales	Hamamelidaceae	Liquidambar	Liquidambar formosana
Rosales	Hamamelidaceae	Loropetalum	Loropetalum chinense
Rosales	Hamamelidaceae	Sinowilsonia	Sinowilsonia henryi
Rosales	Leguminosa	Albizia	Albizia kalkora
Rosales	Leguminosa	Astragalus	Astragalus chinensis
Rosales	Leguminosa	Astragalus	Astragalus kifonsanicus
Rosales	Leguminosa	Astragalus	Astragalus tataricus
Rosales	Leguminosa	Caragana	Caragana leveillei
Rosales	Leguminosa	Caragana	Caragana opulens
Rosales	Leguminosa	Gleditsia	Gleditsia microphylla
Rosales	Leguminosa	Gueldenstaedtia	Gueldenstaedtia maritima
Rosales	Leguminosa	Lens	Lens culinaris
Rosales	Leguminosa	Lespedeza	Lespedeza potaninii
Rosales	Leguminosa	Psoralea	Psoralea corylifolia
Rosales	Leguminosa	Sophora	Sophora flavescens
Rosales	Leguminosa	Sphaerophysa	Sphaerophysa salsula
Rosales	Leguminosae	Aeschynomene	Aeschynomene indica
Rosales	Leguminosae	Amphicarpaea	Amphicarpaea edgeworthii
Rosales	Leguminosae	Apios	Apios fortunei
Rosales	Leguminosae	Astragalus	Astragalus adsurgens
Rosales	Leguminosae	Astragalus	Astragalus melilotoides
Rosales	Leguminosae	Astragalus	Astragalus sinicus
Rosales	Leguminosae	Cassia	Cassia mimosoides
Rosales	Leguminosae	Cassia	Cassia nomame
Rosales	Leguminosae	Cercis	Cercis glabra
Rosales	Leguminosae	Colutea	Colutea arborescens
Rosales	Leguminosae	Crotalaria	Crotalaria sessiliflora
Rosales	Leguminosae	Dalbergia	Dalbergia hupeana
Rosales	Leguminosae	Glycine	Glycine soja
Rosales	Leguminosae	Glycyrrhiza	Glycyrrhiza uralensis
Rosales	Leguminosae	Gueldenstaedtia	Gueldenstaedtia stenophylla
Rosales	Leguminosae	Lathyrus	Lathyrus davidii
Rosales	Leguminosae	Lathyrus	Lathyrus japonicus
Rosales	Leguminosae	Lespedeza	Lespedeza caraganae
Rosales	Leguminosae	Lespedeza	Lespedeza chinensis
Rosales	Leguminosae	Lespedeza	Lespedeza davidii
Rosales	Leguminosae	Lespedeza	Lespedeza formosa
Rosales	Leguminosae	Maackia	Maackia amurensis
Rosales	Leguminosae	Medicago	Medicago minima
Rosales	Leguminosae	Medicago	Medicago ruthenica
Rosales	Leguminosae	Ormosia	Ormosia hosiei
Rosales	Leguminosae	Phaseolus	Phaseolus vulgaris
Rosales	Leguminosae	Pueraria	Pueraria lobata
Rosales	Leguminosae	Robinia	Robinia hispida
Rosales	Leguminosae	Sesbania	Sesbania cannabina
Rosales	Leguminosae	Vicia	Vicia angustifolia
Rosales	Leguminosae	Vicia	Vicia bungei
Rosales	Leguminosae	Vicia	Vicia kioshanica
Rosales	Leguminosae	Wisteria	Wisteria villosa
Rosales	Pittosporaceae	Pittosporum	Pittosporum tobira
Rosales	Platanaceae	Platanus	Platanus occidentalis
Rosales	Rhamnaceae	Hovenia	Hovenia acerba
Rosales	Rhamnaceae	Hovenia	Hovenia dulcis
Rosales	Rhamnaceae	Rhamnella	Rhamnella franguloides
Rosales	Rhamnaceae	Rhamnus	Rhamnus arguta
Rosales	Rhamnaceae	Rhamnus	Rhamnus bungeana
Rosales	Rhamnaceae	Rhamnus	Rhamnus davurica
Rosales	Rhamnaceae	Rhamnus	Rhamnus dumetorum
Rosales	Rhamnaceae	Rhamnus	Rhamnus leptophylla
Rosales	Rhamnaceae	Rhamnus	Rhamnus parvifolia
Rosales	Rosaceae	Amelanchier	Amelanchier asiatica
Rosales	Rosaceae	Chaenomeles	Chaenomeles cathayensis
Rosales	Rosaceae	Chaenomeles	Chaenomeles japonica
Rosales	Rosaceae	Chaenomeles	Chaenomeles sinensis
Rosales	Rosaceae	Cotoneaster	Cotoneaster horizontalis
Rosales	Rosaceae	Cotoneaster	Cotoneaster melanocarpus
Rosales	Rosaceae	Cotoneaster	Cotoneaster multiflorus
Rosales	Rosaceae	Cotoneaster	Cotoneaster submultiflorus
Rosales	Rosaceae	Cotoneaster	Cotoneaster zabelii
Rosales	Rosaceae	Crataegus	Crataegus cuneata
Rosales	Rosaceae	Crataegus	Crataegus hupehensis
Rosales	Rosaceae	Eriobotrya	Eriobotrya japonica
Rosales	Rosaceae	Exochorda	Exochorda racemosa
Rosales	Rosaceae	Geum	Geum aleppicum
Rosales	Rosaceae	Geum	Geum japonicum
Rosales	Rosaceae	Kerria	Kerria japonica
Rosales	Rosaceae	Malus	Malus asiatica
Rosales	Rosaceae	Malus	Malus baccata
Rosales	Rosaceae	Malus	Malus halliana
Rosales	Rosaceae	Malus	Malus hupehensis
Rosales	Rosaceae	Malus	Malus mandshurica
Rosales	Rosaceae	Malus	Malus prunifolia
Rosales	Rosaceae	Malus	Malus pumila
Rosales	Rosaceae	Photinia	Photinia glabra
Rosales	Rosaceae	Photinia	Photinia villosa
Rosales	Rosaceae	Potentilla	Potentilla anserina
Rosales	Rosaceae	Potentilla	Potentilla flagellaris
Rosales	Rosaceae	Potentilla	Potentilla kleiniana
Rosales	Rosaceae	Potentilla	Potentilla longifolia
Rosales	Rosaceae	Potentilla	Potentilla multicaulis
Rosales	Rosaceae	Potentilla	Potentilla tanacetifolia
Rosales	Rosaceae	Prunus	Prunus × subhirtella
Rosales	Rosaceae	Prunus	Prunus dictyoneura
Rosales	Rosaceae	Prunus	Prunus glandulosa
Rosales	Rosaceae	Prunus	Prunus humilis
Rosales	Rosaceae	Prunus	Prunus japonica
Rosales	Rosaceae	Prunus	Prunus sibirica
Rosales	Rosaceae	Prunus	Prunus triloba
Rosales	Rosaceae	Pyracantha	Pyracantha fortuneana
Rosales	Rosaceae	Pyrus	Pyrus betulifolia
Rosales	Rosaceae	Pyrus	Pyrus bretschneideri
Rosales	Rosaceae	Pyrus	Pyrus calleryana
Rosales	Rosaceae	Pyrus	Pyrus phaeocarpa
Rosales	Rosaceae	Pyrus	Pyrus serrulata
Rosales	Rosaceae	Pyrus	Pyrus ussuriensis
Rosales	Rosaceae	Pyrus	Pyrus xerophila
Rosales	Rosaceae	Rhodotypos	Rhodotypos scandens
Rosales	Rosaceae	Rosa	Rosa acicularis
Rosales	Rosaceae	Rosa	Rosa banksiae
Rosales	Rosaceae	Rosa	Rosa bella
Rosales	Rosaceae	Rosa	Rosa davurica
Rosales	Rosaceae	Rosa	Rosa giraldii
Rosales	Rosaceae	Rosa	Rosa roxburghii
Rosales	Rosaceae	Rosa	Rosa xanthina
Rosales	Rosaceae	Rubus	Rubus corchorifolius
Rosales	Rosaceae	Rubus	Rubus crataegifolius
Rosales	Rosaceae	Rubus	Rubus hirsutus
Rosales	Rosaceae	Rubus	Rubus idaeus
Rosales	Rosaceae	Rubus	Rubus phoenicolasius
Rosales	Rosaceae	Rubus	Rubus sumatranus
Rosales	Rosaceae	Sanguisorba	Sanguisorba applanata
Rosales	Rosaceae	Sorbaria	Sorbaria kirilowii
Rosales	Rosaceae	Sorbus	Sorbus discolor
Rosales	Rosaceae	Sorbus	Sorbus pohuashanensis
Rosales	Rosaceae	Spiraea	Spiraea fritschiana
Rosales	Rosaceae	Spiraea	Spiraea japonica
Rosales	Rosaceae	Spiraea	Spiraea prunifolia
Rosales	Rosaceae	Spiraea	Spiraea pubescens
Rosales	Rosaceae	Spiraea	Spiraea thunbergii
Rosales	Rosaceae	Spiraea	Spiraea trilobata
Rosales	Rosaceae	Stephanandra	Stephanandra chinensis
Rosales	Rosaceae	Rosa	Rosa rugosa
Rosales	Rosaceae	Pyrus	Pyrus hopeiensis
Rosales	Ulmaceae	Ulmus	Ulmus americana
Rosales	Ulmaceae	Ulmus	Ulmus bergmanniana
Rosales	Ulmaceae	Ulmus	Ulmus changii
Rosales	Ulmaceae	Ulmus	Ulmus davidiana
Rosales	Ulmaceae	Ulmus	Ulmus laevis
Rosales	Ulmaceae	Zelkova	Zelkova serrata
Rosales	Ulmaceae	Ulmus	Ulmus glaucescens
Rosales	Ulmaceae	Ulmus	Ulmus laciniata
Rosales	Urticaceae	Boehmeria	Boehmeria nivea
Rosales	Urticaceae	Boehmeria	Boehmeria silvestrii
Rosales	Urticaceae	Boehmeria	Boehmeria spicata
Rosales	Urticaceae	Boehmeria	Boehmeria tricuspis
Rosales	Urticaceae	Parietaria	Parietaria micrantha
Rosales	Urticaceae	Urtica	Urtica laetevirens
Rubiales	Caprifoliaceae	Lonicera	Lonicera maackii
Rubiales	Caprifoliaceae	Kolkwitzia	Kolkwitzia amabilis
Rubiales	Caprifoliaceae	Lonicera	Lonicera fragrantissima
Rubiales	Caprifoliaceae	Lonicera	Lonicera hispida
Rubiales	Caprifoliaceae	Lonicera	Lonicera japonica
Rubiales	Caprifoliaceae	Lonicera	Lonicera tragophylla
Rubiales	Caprifoliaceae	Viburnum	Viburnum macrocephalum
Rubiales	Caprifoliaceae	Weigela	Weigela japonica
Rutineae	Meliaceae	Melia	Melia azedarach
Santalales	Loranthaceae	Loranthus	Loranthus tanakae
Santalales	Santalaceae	Thesium	Thesium longifolium
Sapindales	Aceraceae	Acer	Acer ginnala
Sapindales	Aceraceae	Acer	Acer griseum
Sapindales	Aceraceae	Acer	Acer grosseri
Sapindales	Aceraceae	Acer	Acer henryi
Sapindales	Aceraceae	Acer	Acer negundo
Sapindales	Anacardiaceae	Cotinus	Cotinus coggygria
Sapindales	Anacardiaceae	Toxicodendron	Toxicodendron succedaneum
Sapindales	Anacardiaceae	Toxicodendron	Toxicodendron sylvestre
Sapindales	Celastraceae	Euonymus	Euonymus fortunei
Sapindales	Celastraceae	Euonymus	Euonymus hamiltonianus
Sapindales	Celastraceae	Euonymus	Euonymus nitidus
Sapindales	Celastraceae	Euonymus	Euonymus oxyphyllus
Sapindales	Celastraceae	Euonymus	Euonymus phellomanus
Sapindales	Rutaceae	Citrus	Citrus limon
Sapindales	Rutaceae	Citrus	Citrus trifoliata
Sapindales	Rutaceae	Dictamnus	Dictamnus dasycarpus
Sapindales	Rutaceae	Phellodendron	Phellodendron amurense
Sapindales	Rutaceae	Zanthoxylum	Zanthoxylum armatum
Sapindales	Rutaceae	Zanthoxylum	Zanthoxylum schinifolium
Sapindales	Sapindaceae	Aesculus	Aesculus chinensis
Sapindales	Sapindaceae	Cardiospermum	Cardiospermum halicacabum
Sapindales	Sapindaceae	Koelreuteria	Koelreuteria paniculata
Sapindales	Sapindaceae	Sapindus	Sapindus mukorossi
Sapindales	Simaroubaceae	Picrasma	Picrasma quassioides
Saxifragales	Grossulariaceae	Ribes	Ribes fasciculatum
Saxifragales	Grossulariaceae	Ribes	Ribes pulchellum
Saxifragales	Saxifragaceae	Astilbe	Astilbe chinensis
Saxifragales	Saxifragaceae	Astilbe	Astilbe grandis
Saxifragales	Saxifragaceae	Saxifraga	Saxifraga sibirica
Saxifragales	Saxifragaceae	Saxifraga	Saxifraga stolonifera
Scitamineae	Musaceae	Musa	Musa basjoo
Solanales	Convolvulaceae	Calystegia	Calystegia soldanella
Solanales	Convolvulaceae	Cuscuta	Cuscuta australis
Solanales	Convolvulaceae	Merremia	Merremia sibirica
Solanales	Solanaceae	Physalis	Physalis angulata
Solanales	Solanaceae	Solanum	Solanum lyratum
Solanales	Solanaceae	Solanum	Solanum septemlobum
Taxales	Taxaceae	Taxus	Taxus cuspidata
Taxales	Taxaceae	Torreya	Torreya grandis
Taxales	Taxaceae	Torreya	Torreya nucifera
Tubiflorae	Convolvulaceae	Calystegia	Calystegia pellita
Tubiflorae	Convolvulaceae	Convolvulus	Convolvulus arvensis
Tubiflorae	Convolvulaceae	Cuscuta	Cuscuta lupuliformis
Tubiflorae	Labiatae	Ajuga	Ajuga linearifolia
Tubiflorae	Labiatae	Amethystea	Amethystea caerulea
Tubiflorae	Labiatae	Lycopus	Lycopus lucidus var. lucidus
Tubiflorae	Labiatae	Nepeta	Nepeta cataria
Tubiflorae	Labiatae	Scutellaria	Scutellaria baicalensis
Tubiflorae	Labiatae	Stachys	Stachys chinensis
Tubiflorae	Labiatae	Teucrium	Teucrium ussuriense
Tubiflorae	Labiatae	Thymus	Thymus mongolicus
Tubiflorae	Labiatae	Thymus	Thymus quinquecostatus
Tubiflorae	Lentibulariaceae	Utricularia	Utricularia aurea
Tubiflorae	Lentibulariaceae	Utricularia	Utricularia bifida
Tubiflorae	Lentibulariaceae	Utricularia	Utricularia vulgaris
Tubiflorae	Orobanchaceae	Orobanche	Orobanche coerulescens
Tubiflorae	Pedaliaceae	Trapella	Trapella sinensis
Umbelliflorae	Cornaceae	Bothrocaryum	Bothrocaryum controversum
Umbelliflorae	Cornaceae	Swida	Swida alba
Umbelliflorae	Cornaceae	Swida	Swida walteri
Umbelliflorae	Umbelliferae	Centella	Centella asiatica
Umbelliflorae	Umbelliferae	Cryptotaenia	Cryptotaenia japonica
Umbelliflorae	Umbelliferae	Daucus	Daucus carota
Umbelliflorae	Umbelliferae	Glehnia	Glehnia littoralis
Umbelliflorae	Umbelliferae	Hydrocotyle	Hydrocotyle sibthorpioides
Umbelliflorae	Umbelliferae	Ligusticum	Ligusticum sinense
Umbelliflorae	Umbelliferae	Nothosmyrnium	Nothosmyrnium japonicum
Umbelliflorae	Umbelliferae	Peucedanum	Peucedanum praeruptorum
Umbelliflorae	Umbelliferae	Torilis	Torilis scabra
Urticales	Moraceae	Morus	Morus australis
Urticales	Moraceae	Morus	Morus cathayana
Vitales	Vitaceae	Ampelopsis	Ampelopsis glandulosa
Vitales	Vitaceae	Cayratia	Cayratia japonica
Vitales	Vitaceae	Parthenocissus	Parthenocissus dalzielii
Vitales	Vitaceae	Parthenocissus	Parthenocissus quinquefolia
Vitales	Vitaceae	Tetrastigma	Tetrastigma hemsleyanum
Vitales	Vitaceae	Vitis	Vitis flexuosa
Vitales	Vitaceae	Vitis	Vitis heyneana
Vitales	Vitaceae	Vitis	Vitis pseudoreticulata
Vitales	Vitaceae	Ampelopsis	Ampelopsis aconitifolia
Zingiberales	Zingiberaceae	Zingiber	Zingiber officinale
